# Supplementary material for: Small molecule branched-chain ketoacid dehydrogenase kinase (BDK) inhibitors with opposing effects on BDK protein levels
Source: PubMed Central journal article supplement (PMC10412597; doi:10.1038/s41467-023-40536-y), 2023-08-09
Supplement: 41467_2023_40536_MOESM1_ESM.pdf [file 41467_2023_40536_MOESM1_ESM.pdf]

## Supplementary Information

### **Small molecule branched-chain ketoacid dehydrogenase kinase (BDK) inhibitors with opposing effects on BDK protein levels**

Rachel J. Roth Flach, Eliza Bollinger, Allan R. Reyes, Brigitte Laforest, Bethany L. Kormos, Shenping Liu, Matthew R. Reese, Luis A. Martinez Alsina, Leanne Buzon, Yuan Zhang, Bruce Bechle, Amy Rosado, Parag V. Sahasrabudhe, John Knafels, Samit K. Bhattacharya, Kiyoyuki Omoto, John C. Stansfield, Liam D. Hurley, LouJin Song, Lina Luo, Susanne B. Bretkopf, Mara Monetti, Teresa Cunio, Brendan Tierney, Frank J. Geoly, Jake Delmore, C. Parker Siddall, Liang Xue, Ka N. Yip, Amit S. Kalgutkar, Russell A. Miller, Bei B. Zhang, Kevin J. Filipski

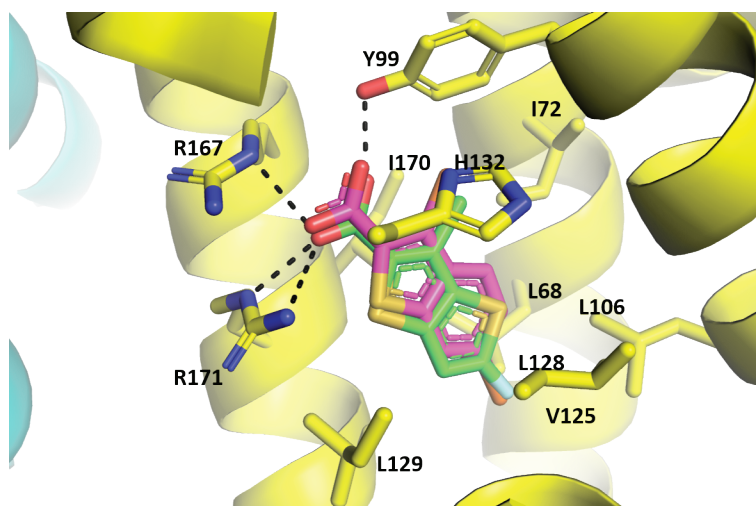

**Supplementary Figure 1. Overlay of PF-07208254 and BT2 bound to hBDK from X-ray structures.** PF-07208254 is shown in stick model with C atoms colored green. Superimposed is BT2 with C atoms colored in pink. BDK side chains that contact PF-07208254 are shown in sticks. Polar interactions are shown in dash.

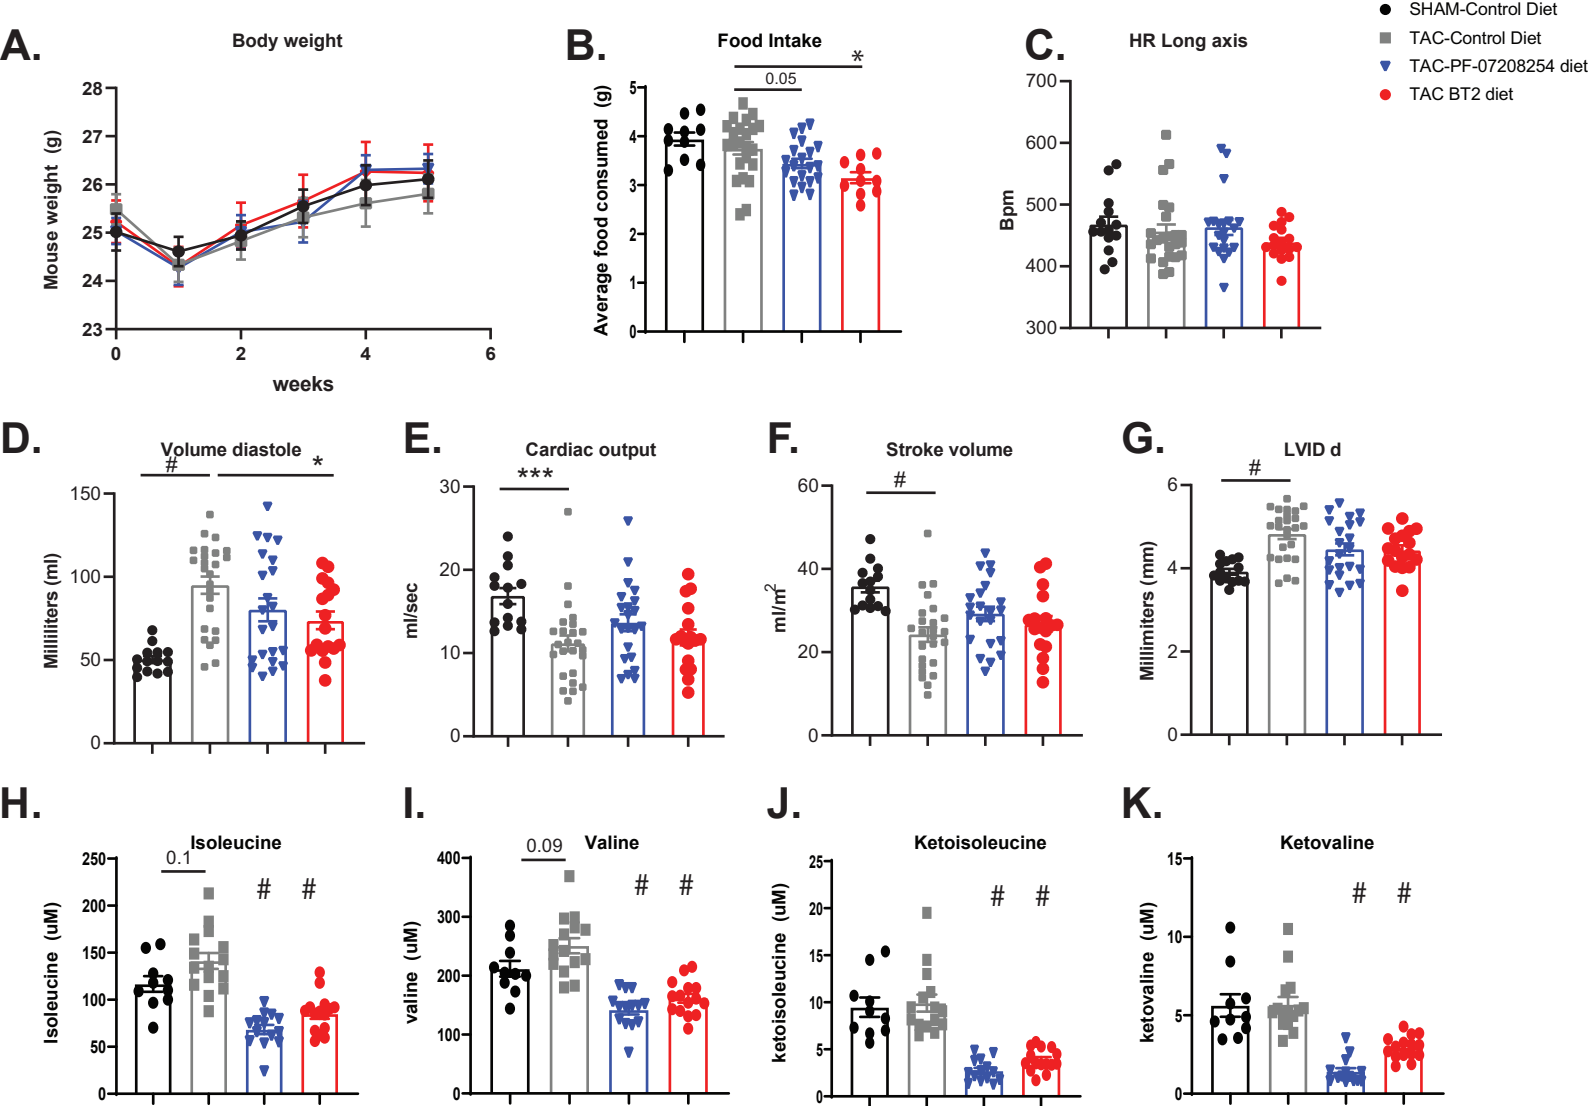

**Supplementary Figure 2. PF-07208254 improves cardiac function in a TAC model and reduces BCAA and BCKA.** Mice were subjected to TAC surgery as described in Figure 1A. **A.** Body weights throughout the study (N=10-23 animals/group; statistics performed using a longitudinal mixed effects model with a random intercept for each mouse and an AR(1) covariance structure). **B.** Average daily food intake (N=10-23 animals/group;  $p=0.010$ ). **C-G.** Echocardiography endpoints (N=14-26 animals/group). **C.** Heart rate (HR). **D.** Volume at diastole (#;  $p<0.0001$ , \*;  $p=0.044$ ). **E.** Cardiac output (\*\*;  $p=0.001$ ), **F.** Stroke volume (#;  $p<0.0001$ ), **G.** Left ventricular internal diameter at diastole (LVID;d) (#;  $p<0.0001$ ). **H-K.** Plasma BCAA and BCKA were measured at day 38 (N=10-14 animals/group). **H.** Isoleucine (#;  $p<0.0001$ ), **I.** Valine (#;  $p<0.0001$ ), **J.** Ketoisoleucine (#;  $p<0.0001$ ), **K.** Ketovaline (#;  $p<0.0001$ ). Statistics performed for B-K by one-way ANOVA with Tukey post-hoc test. Data represent the mean  $\pm$  SEM. Source data are provided as a Source Data file.

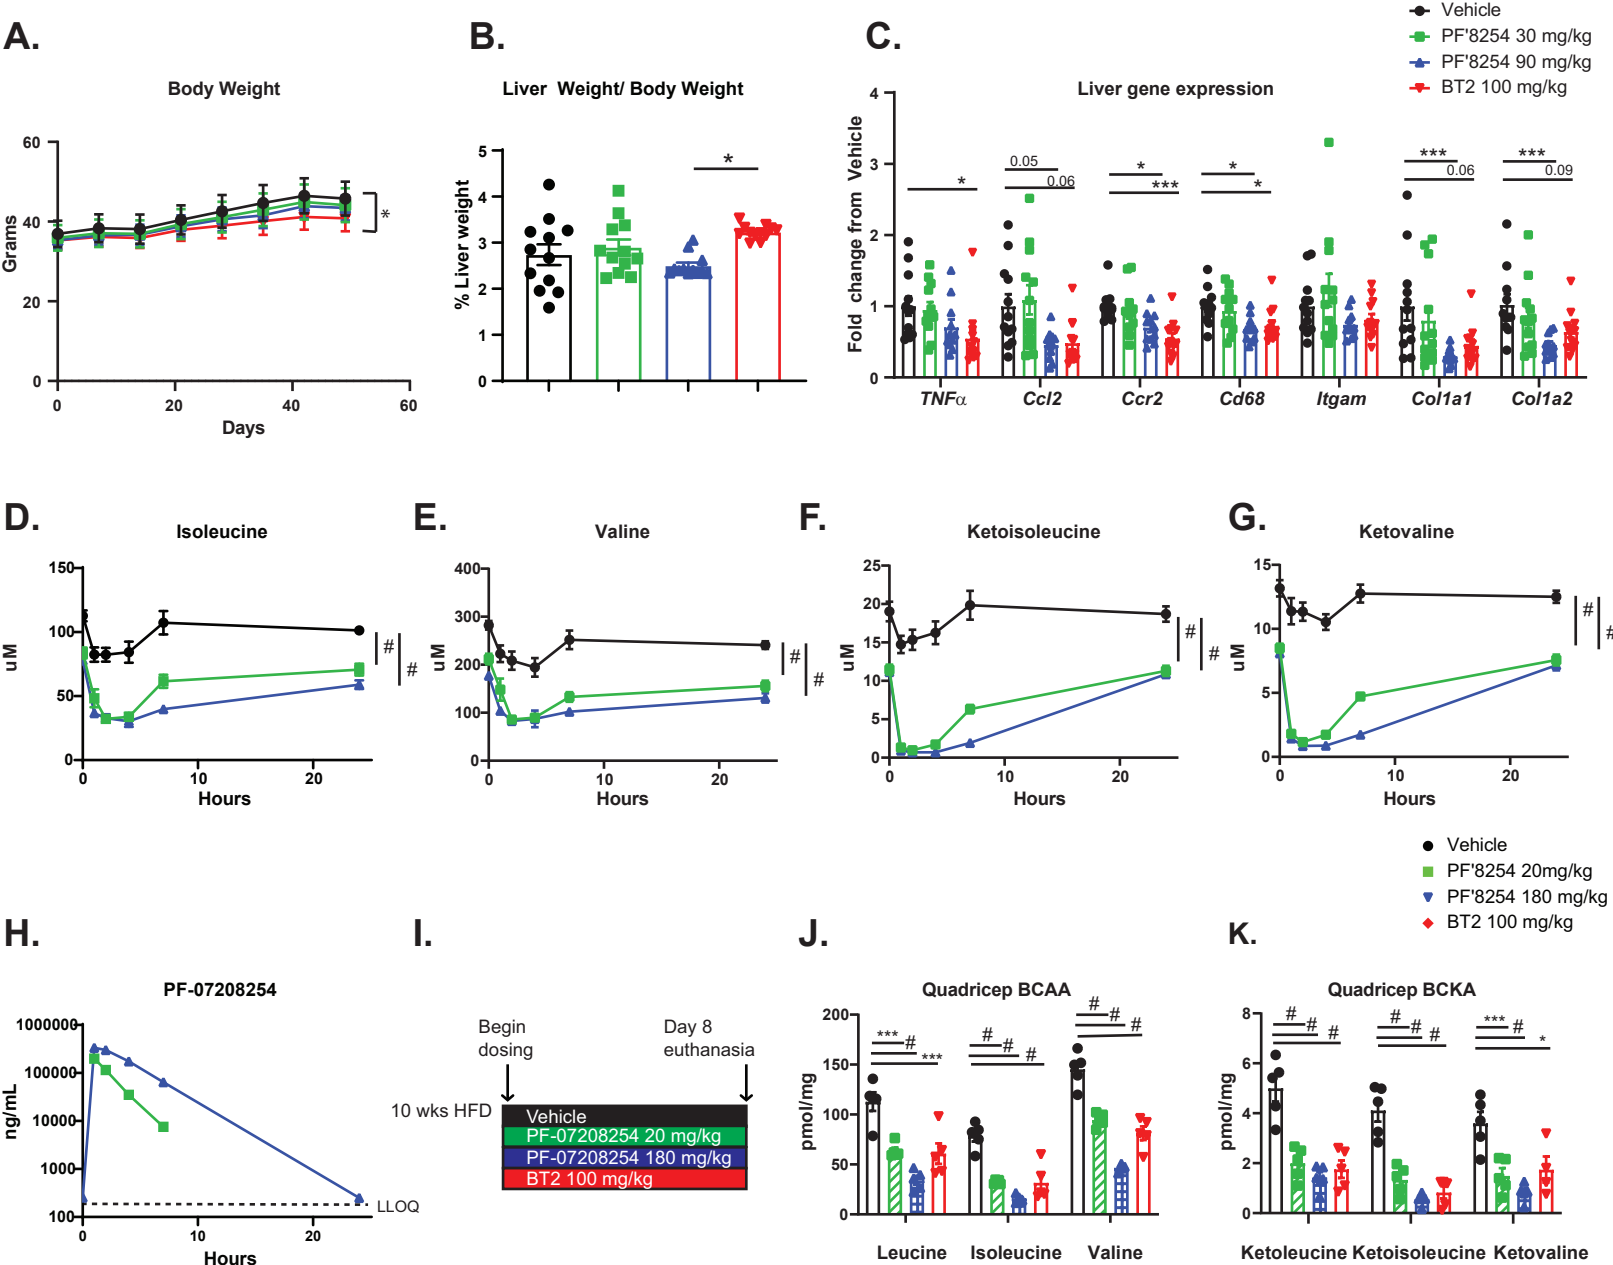

**Supplementary Figure 3. PF-07208254 improves metabolic endpoints and lowers BCAA/BCKA in HFD-fed mice.** Mice were fed HFD and treated with PF-07208254 or BT2 as in Figure 2A. **A.** Body weights throughout the study (N=11-12; a longitudinal mixed effects model with a random intercept for each mouse and an AR(1) covariance structure was fit). **B.** Liver weight was measured as a percentage of body weight (N=12 animals/group; a pairwise Wilcoxon test was performed \*;  $p=0.014$ ). **C.** RNA was isolated from livers, and qRT-PCR was performed for several genes (N=12 animals/group; A one-way ANOVA with Tukey HSD test (*ccr2* \*;  $p=0.043$ , \*\*\*;  $p=0.001$ ) or a pairwise Wilcoxon test was performed (*tnfa* \*;  $p=0.017$ , *ccl2*, *cd68* \*;  $p=0.015$ ,  $0.043$ , *itgam*, *col1a1* \*\*\*;  $p=0.004$ , *col1a2* \*\*\*;  $p=0.002$ ). **D-H.** A PK/PD assessment was performed after 7 weeks of treatment in which mice are dosed with compound and timed bleeds are performed to measure BCAA, BCKA and drug levels (N=6-12 animals/group; a one-way ANOVA with Tukey HSD test was performed for D-G). **D.** Isoleucine (#;  $p<0.0001$ ), **E.** Valine (#;  $p<0.0001$ ), **F.** Ketoisoleucine (#;  $p<0.0001$ ), **G.** Ketovaline (#;  $p<0.0001$ ). **H.** PF-07208254 concentrations. **I-K.** HFD-fed mice were randomized into groups after 10 weeks on diet and treated for 8 days with PF-07208254 or BT2. Quadriceps muscle was isolated one hour post final compound dose, and BCAA and BCKA were measured (N=4-5 animals/group; a one-way ANOVA with Tukey HSD test was performed). **I.** Study design. **J.** BCAA (\*\*\*;  $p=0.001$ , #;  $p<0.0001$ ). **K.** BCKA (\*;  $p=0.019$ , \*\*\*;  $p=0.005$ , #;  $p<0.0001$ ). Data represent the mean  $\pm$  SEM. Source data are provided as a Source Data file.

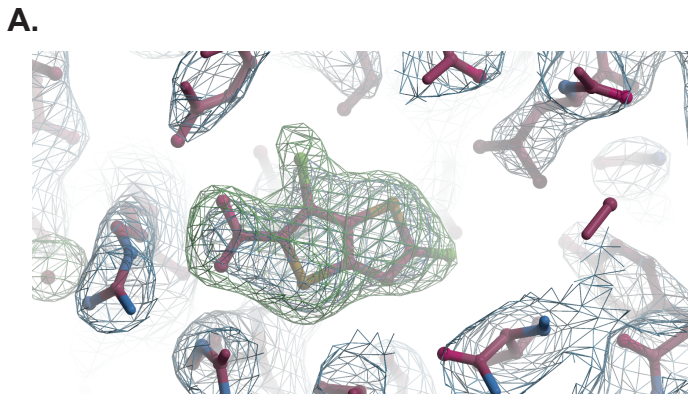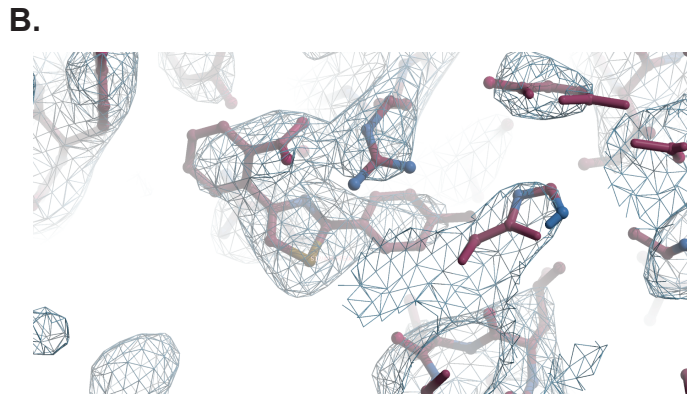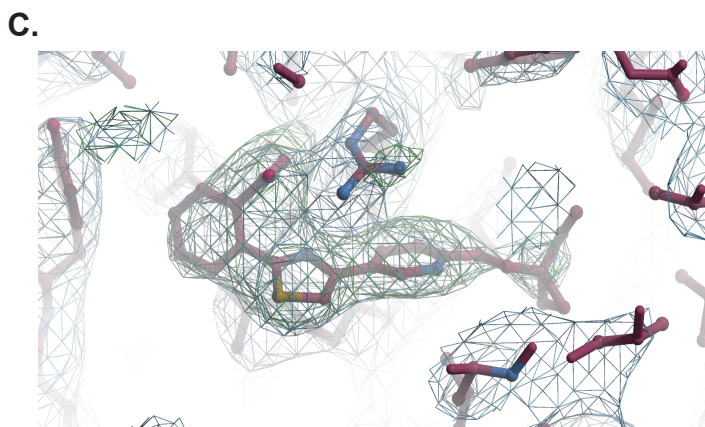

**Supplementary Figure 4. OMIT maps for crystal structures. A.** OMIT map for PF-07208254. To show model building quality, the final refined model was embedded in initial 2Fo-Fc (blue mesh) and Fo-Fc (green mesh) maps contoured at  $1.2 \sigma$  and  $3.0 \sigma$ , respectively, before the ligand was included in calculation. **B.** OMIT map for **S3**. To show model building quality, the final refined model was embedded in initial 2Fo-Fc (blue mesh) map contoured at  $1.2 \sigma$ , before the ligand was included in calculation. **C.** OMIT map for PF-07247685. To show model building quality, the final refined model was embedded in initial 2Fo-Fc (blue mesh) and Fo-Fc (green mesh) maps contoured at  $1.2 \sigma$  and  $3.0 \sigma$ , respectively, before the ligand was included in calculation.

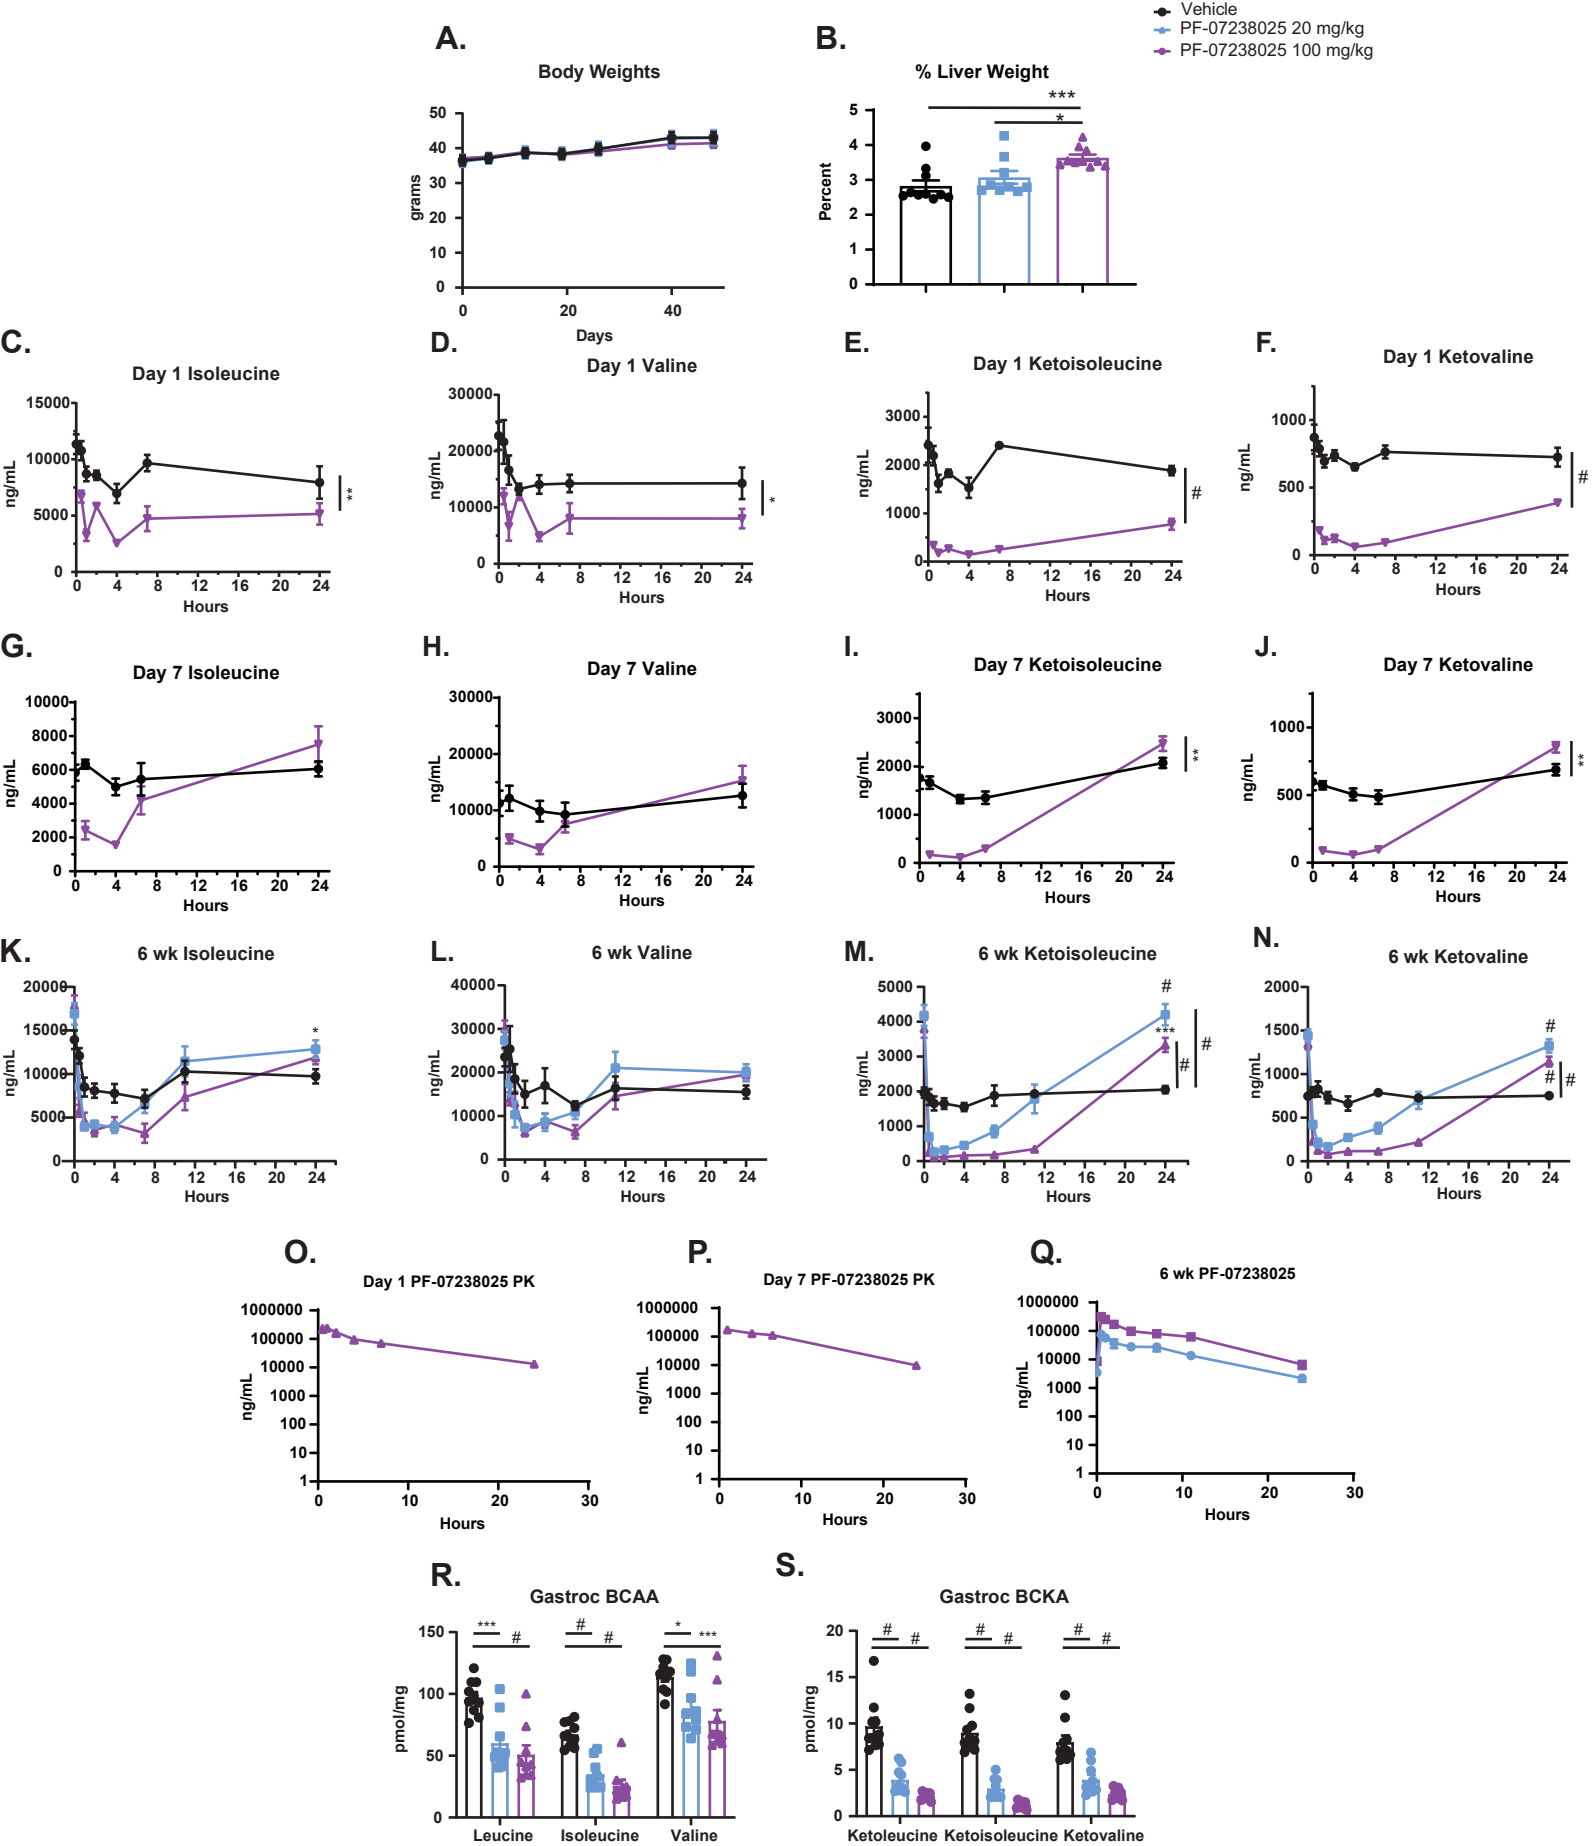

Supplementary Figure 5  
Related to Figure 4

**Supplementary Figure 5. Thiazole PF-07238025 does not improve metabolic endpoints after day 2, and BCAA/BCKA rebound occurs over time.** Mice were fed HFD for 10 weeks, at which time animals were randomized into groups, and treated daily with vehicle or PF-07238025 for 8 weeks as in Figure 4D. **A.** Body weights throughout the study duration (N=9-10 animals/group; a longitudinal mixed effects model with a random intercept for each mouse and an AR(1) covariance structure was fit). **B.** % liver weight at euthanasia (N=9-10 animals/group; a one-way ANOVA with Tukey HSD test was performed, \*,  $p=0.03$ , \*\*\*,  $p=0.001$ ). **C-Q.** PK/PD assessments were performed on day 1 (N=4 animals/group), after 7 days (N=4 animals/group), or 6 weeks of treatment (N=5-10 animals/group), in which mice were dosed with compound, and timed bleeds were performed to measure drug levels, BCAA, and BCKA levels, as in Figure 4K-N. **A** one-way ANOVA with Tukey HSD test was performed on AUC and 24 hour time points for each analyte. **C.** Day 1 Isoleucine (\*\*;  $p=0.0059$ ), **D.** Day 1 Valine (\*;  $p=0.027$ ), **E.** Day 1 Ketoisoleucine (#;  $p=2.16 \times 10^{-6}$ ), **F.** Day 1 Ketovaline (#;  $p=0.0001$ ), **G.** Day 7 Isoleucine, **H.** Day 7 Valine, **I.** Day 7 Ketoisoleucine (\*\*;  $p=0.00055$ ), **J.** Day 7 Ketovaline (\*\*\*,  $p=0.0046$ ), **K.** Week 6 Isoleucine (\*;  $p=0.048$ ), **L.** Week 6 Valine, **M.** Week 6 Ketoisoleucine (#;  $p<0.0001$ , \*\*\*,  $p=0.001$ ), **N.** Week 6 Ketovaline (#;  $p<0.0001$ ). **O-Q.** Total PF-07238025 concentrations at **O.** Day 1, **P.** Day 7, and **Q.** Week 6. **R-S.** Gastrocnemius muscle was isolated 1 hour post final compound dose, and **R.** BCAA (isoleucine\*\*\*;  $p=0.001$ , #;  $p<0.0001$ , valine\*\*\*;  $p=0.002$ , \*,  $p=0.028$ ) and **S.** BCKA were measured (#;  $p<0.0001$ ). Data represent the mean  $\pm$  SEM. Source data are provided as a Source Data file

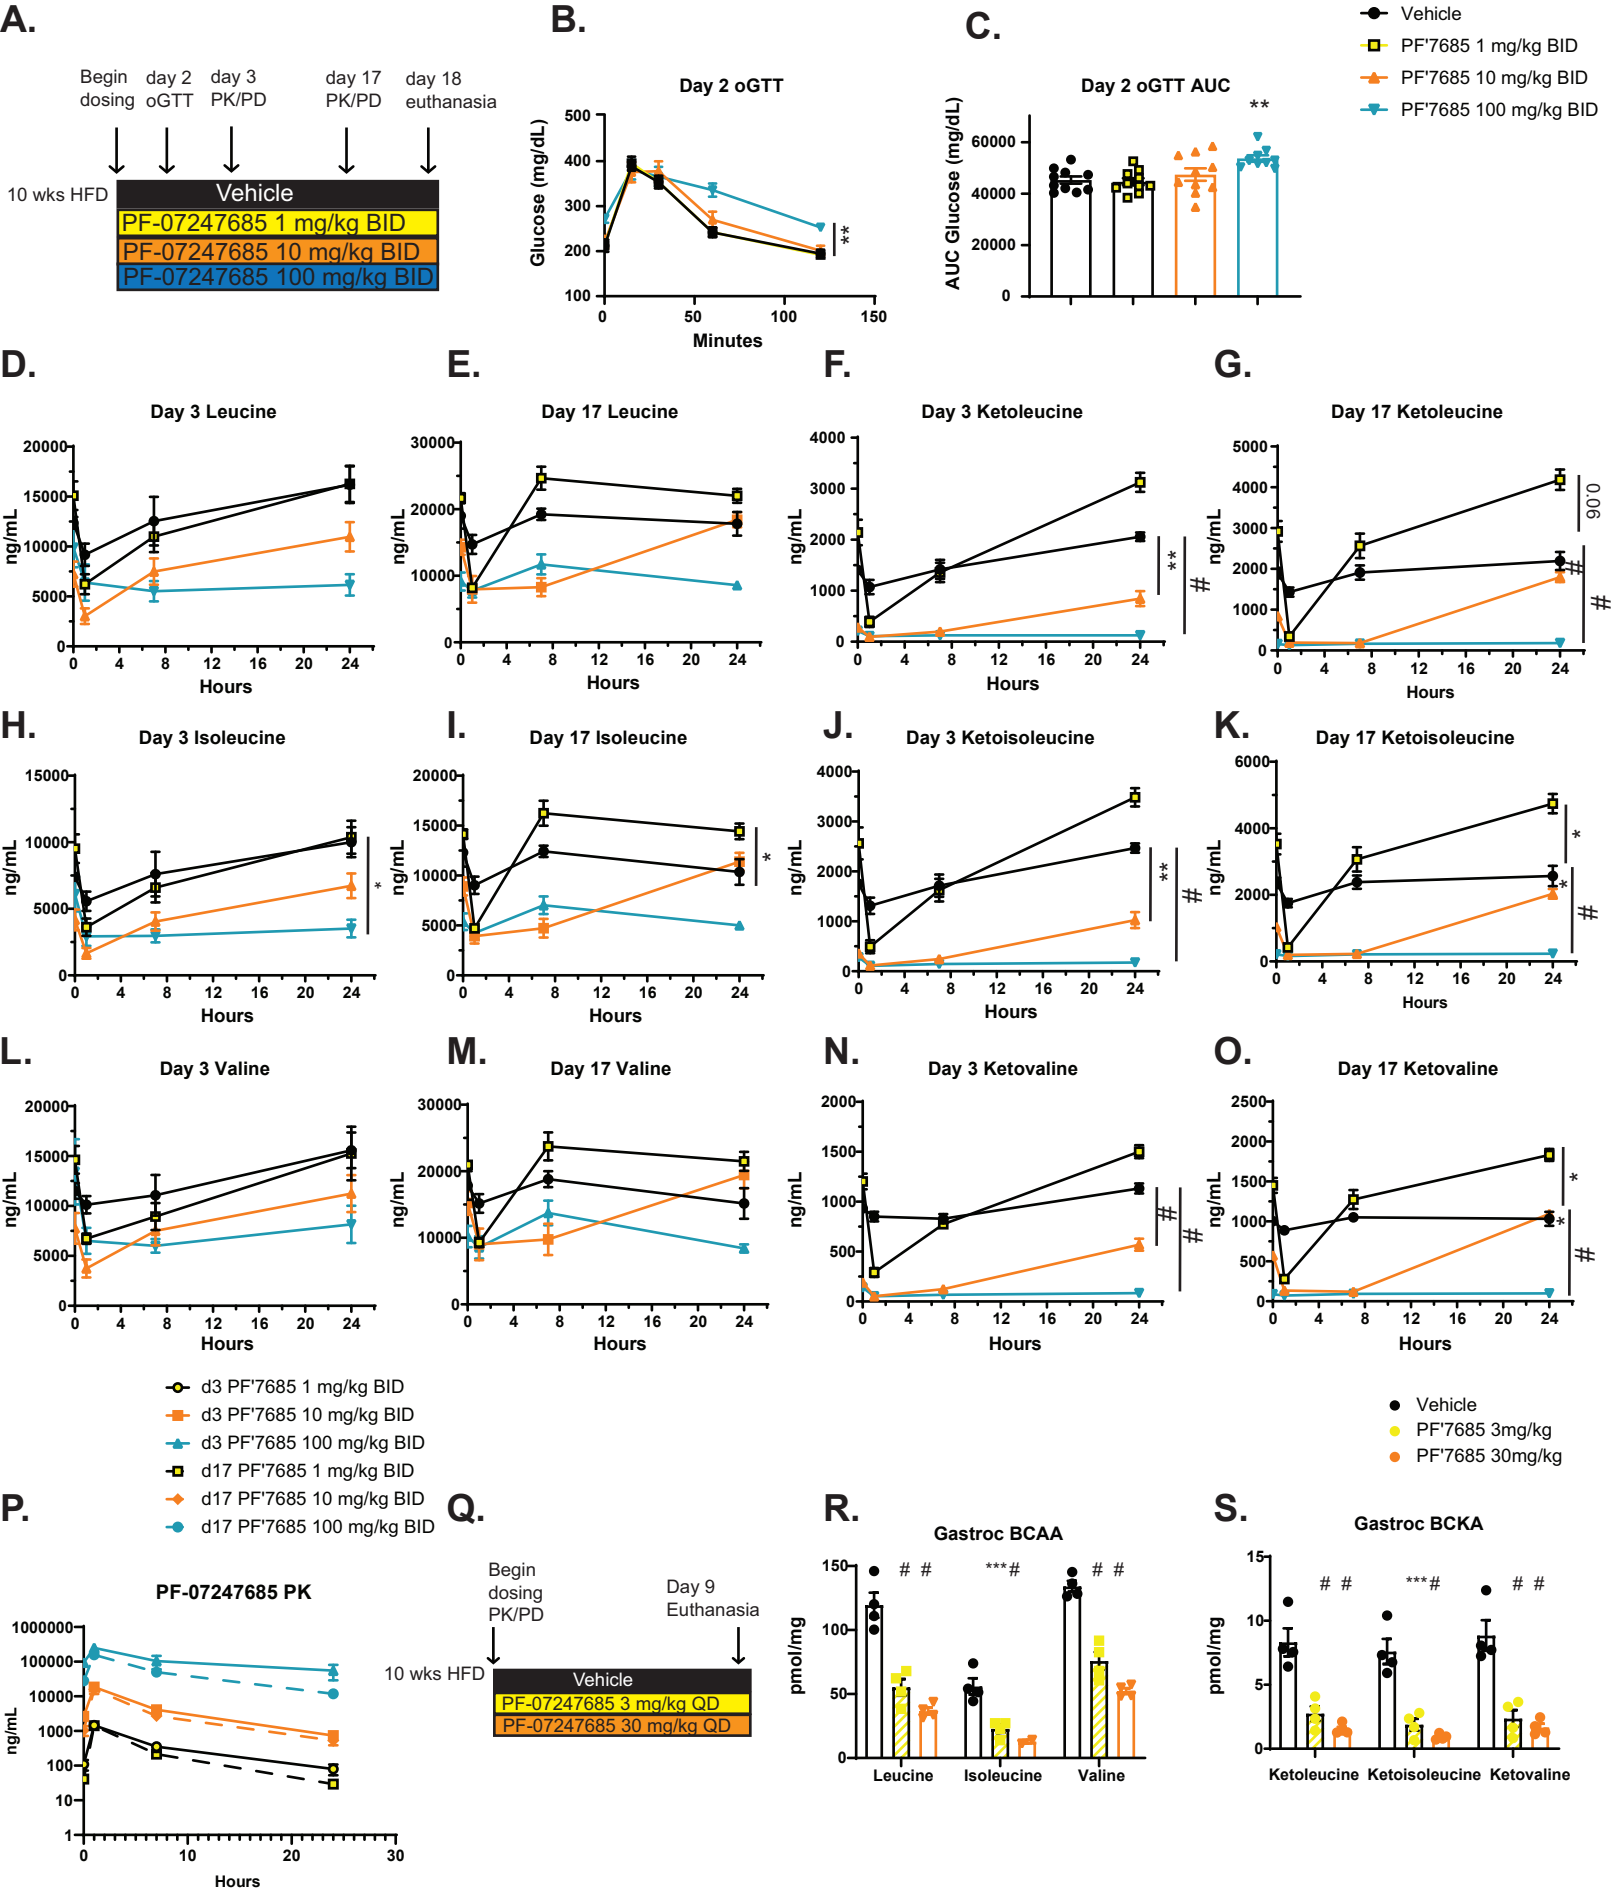

Supplementary Figure 6  
Related to Figure 4



**Supplementary Figure 6. Thiazole PF-07247685 does not improve glycemia but inhibits BDK and acutely lowers BCKA in plasma and tissues.** Mice were fed HFD for 10 weeks, at which time animals were randomized into groups and treated BID with vehicle or PF-07247685 for 18 days. **A.** Study design. **B-C.** An oral glucose tolerance test (oGTT) was performed on day 2 (N=9-10 animals/group; one-way ANOVA with Tukey HSD test was performed on AUC, \*\*,  $p=0.008$ ). **B.** oGTT, **C.** oGTT AUC. **D-P.** PK/PD assessments were performed on days 3 and 17, in which mice were dosed with compound, and timed bleeds were performed to measure drug levels and BCKA levels (N=5 animals/group; one-way ANOVA with Tukey HSD test was performed on AUC in D-O). **D.** Day 3 Leucine, **E.** Day 17 Leucine, **F.** Day 3 Ketoleucine (\*\*;  $p=0.006$ , #;  $p<0.0001$ ), **G.** Day 17 Ketoleucine (#;  $p<0.0001$ ), **H.** Day 3 Isoleucine (\*;  $p=0.02$ ), **I.** Day 17 Isoleucine (\*;  $p=0.028$ ), **J.** Day 3 Ketoisoleucine (\*\*;  $p=0.001$ , #;  $p<0.0001$ ), **K.** Day 17 Ketoisoleucine (\*;  $p=0.012$ , 0.019, #;  $p<0.0001$ ), **L.** Day 3 Valine, **M.** Day 17 Valine, **N.** Day 3 Ketovaline (#;  $p=0.0000$ ), **O.** Day 17 Ketovaline (\*;  $p=0.01$ , 0.023, #;  $p<0.0001$ ), **P.** Total PF-07247685 levels on days 3 and 17. **Q-S.** Mice were fed HFD for 10 weeks, at which time animals were randomized into groups and treated QD with vehicle or PF-07247685 for 9 days. **Q.** Study design. **R-S.** Muscle was harvested one hour post final compound dose, and **R.** BCAA (#;  $p<0.0001$ , \*\*\*,  $p=0.001$ ) and **S.** BCKA (#;  $p<0.0001$ ) were assessed by mass spectrometry (N=2-4 animals/group; one-way ANOVA with Tukey HSD test was performed for statistics). Data represent the mean  $\pm$  SEM. Source data are provided as a Source Data file.

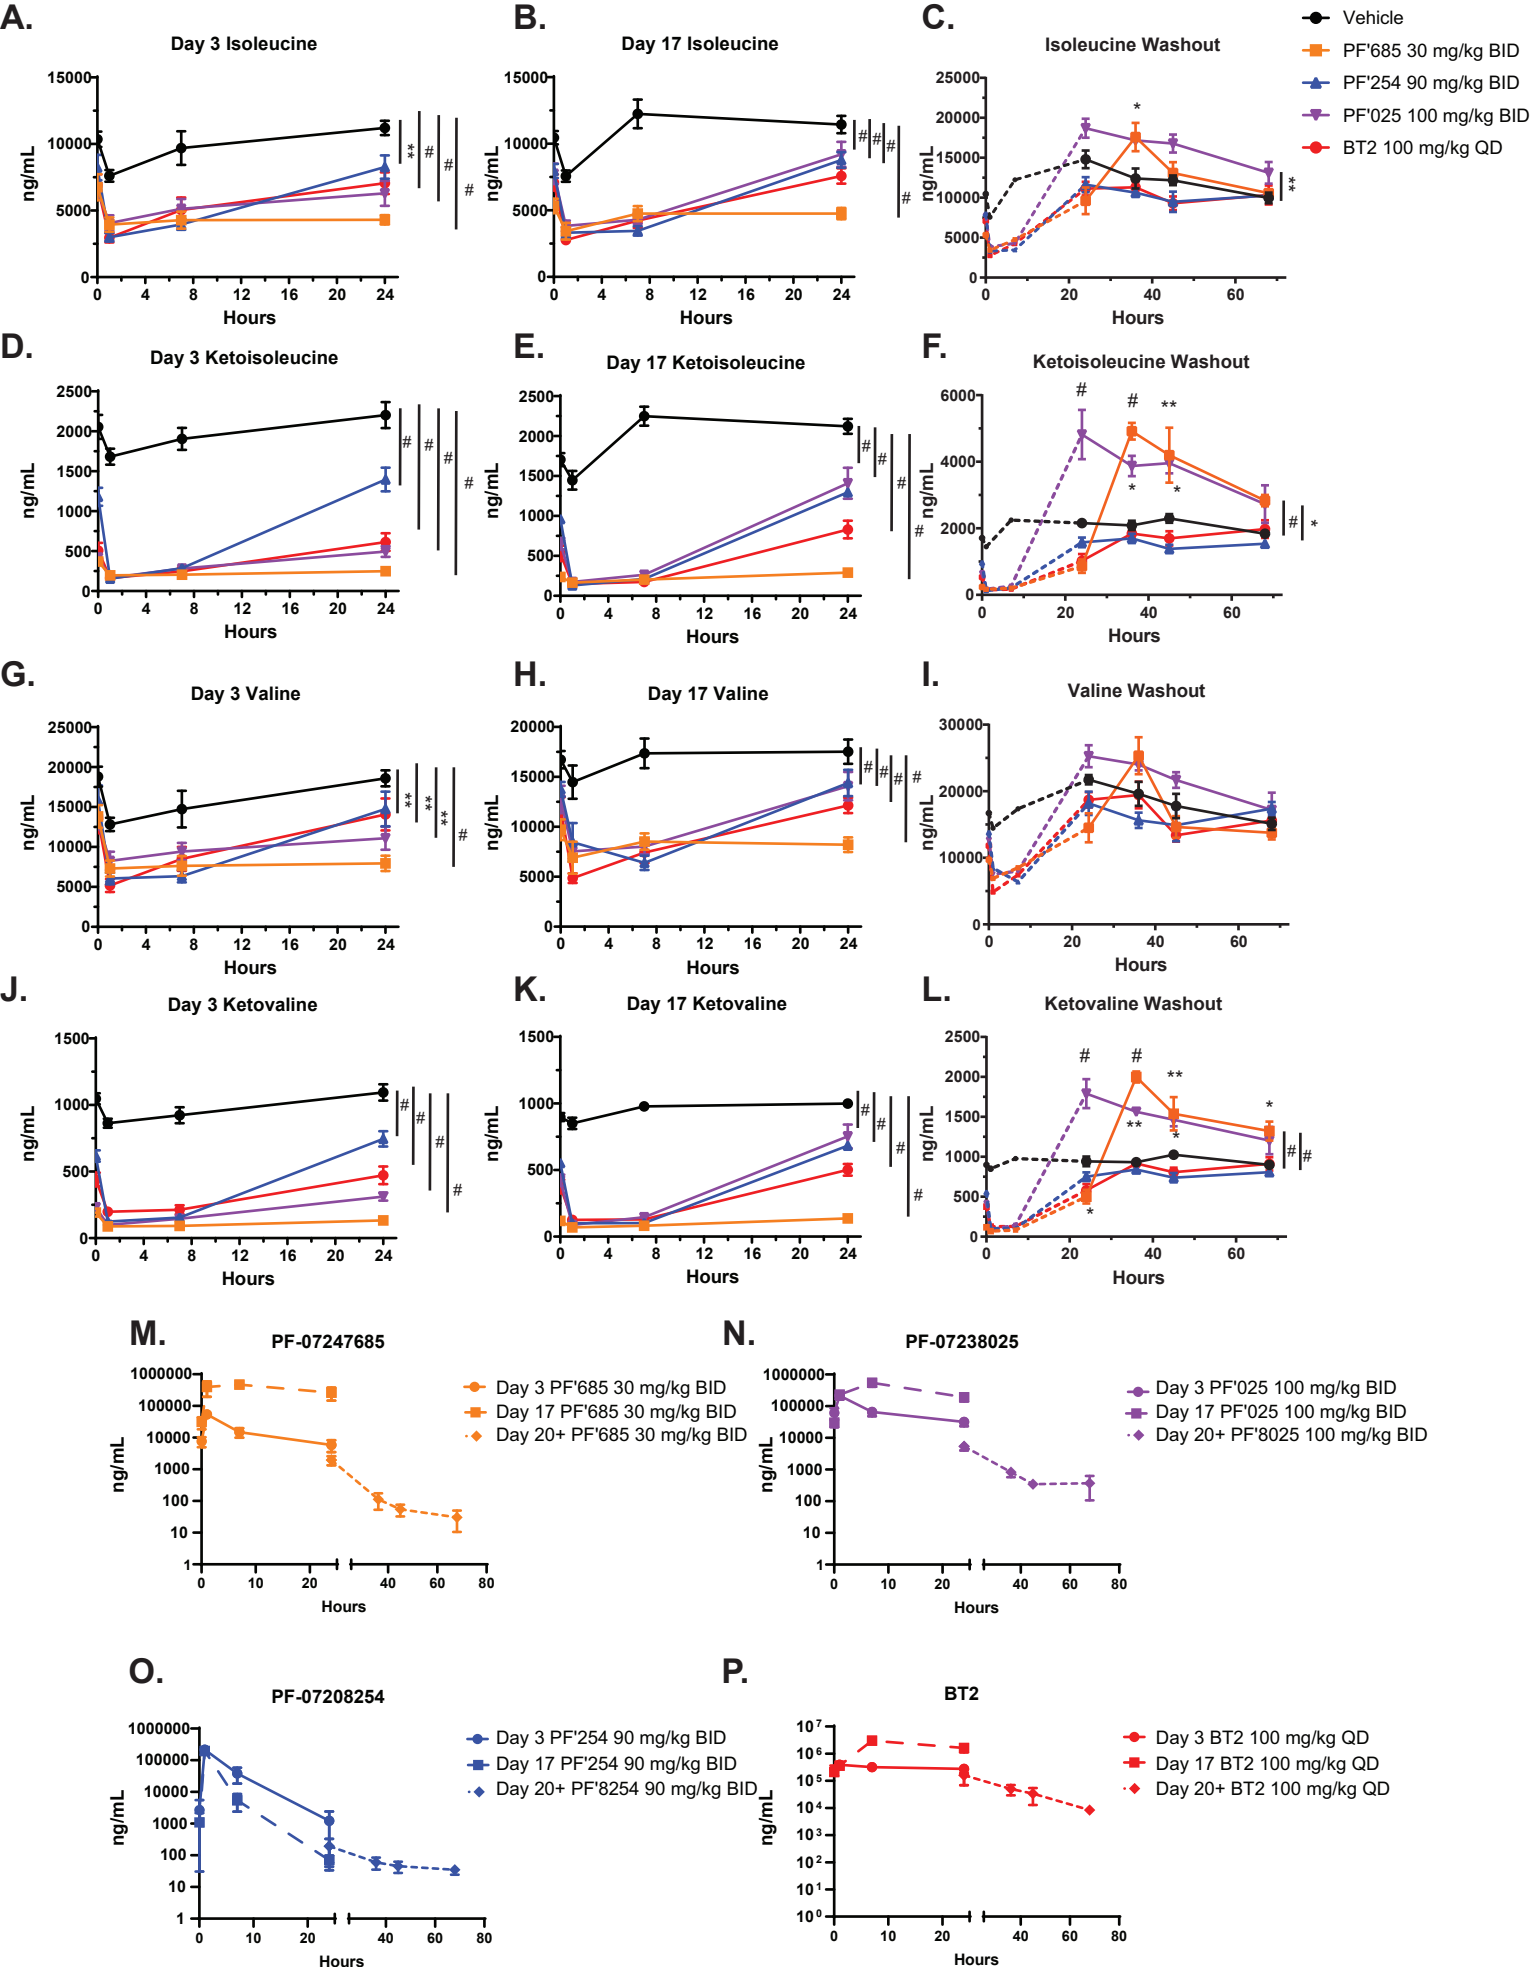

Supplementary Figure 7; Related to Figure 5

**Supplementary Figure 7. Additional BCAA/BCKA and drug levels during study described in Figure 5.** Mice were fed HFD for 10 weeks, at which time animals were randomized into groups, and treated BID or QD as indicated with vehicle, BT2, PF-07208254, PF-07247685, or PF-07238025 at maximal inhibitory doses. Mice were bled immediately prior to dosing compound, 1 hour post compound dose, 4 hours post compound dose, 7 hours post compound dose (immediately prior to 2<sup>nd</sup> daily compound dose if BID dosed), and 24 hours after first compound dose on day 3 and day 17 (N=8-9 animals/group). Washout bleeds were performed at 24, 36, 45 and 68 hours post final compound dose on days 20-22 (N=5 animals/group; a one way ANOVA with Tukey post hoc test was used for statistics on A-L for AUC and 24, 36, 45, 68 h time points). **A.** Isoleucine was measured on day 3 (\*\*;  $p=0.008$ , #;  $p<0.0001$ ), **B.** day 17 (#;  $p<0.0001$ ), and **C.** upon compound washout (\*;  $p=0.03$ , \*\*;  $p=0.001$ ). **D.** Ketoisoleucine was measured on day 3 (#;  $p<0.0001$ ), **E.** day 17 (#;  $p<0.0001$ ), and **F.** upon compound washout (AUC #;  $p<0.0001$ , \*;  $p=0.010$ , per time point  $p<0.0001$ , \*;  $p=0.010$ , 0.018, \*\*;  $p=0.003$ ). **G.** Valine was measured on day 3 (\*\*;  $p=0.001$ , #;  $p<0.0001$ ), **H.** day 17 (#;  $p<0.0001$ ), and **I.** upon compound washout. **J.** Ketovaline was measured on day 3 (#;  $p<0.0001$ ), **K.** day 17 (#;  $p<0.0001$ ), and **L.** upon compound washout (AUC #;  $p<0.0001$ , per time point #;  $p<0.0001$ , \*\*;  $p=0.001$ ,  $p=0.002$ , \*;  $p=0.022$ , 0.007, 0.03). Dashed lines in panels C,F,I & L represent the 0-7 hour time points from panels B, E, H & K for visualization purposes. Data represent the mean  $\pm$  SEM. **M-P.** Drug levels throughout study. **M.** PF-07247685, **N.** PF-07238025, **O.** PF-07208254, **P.** BT2. Solid lines represent day 3, dashed lines day 17, dotted lines are washout days 20-21. Data represent the mean  $\pm$  SD. Source data are provided as a Source Data file.

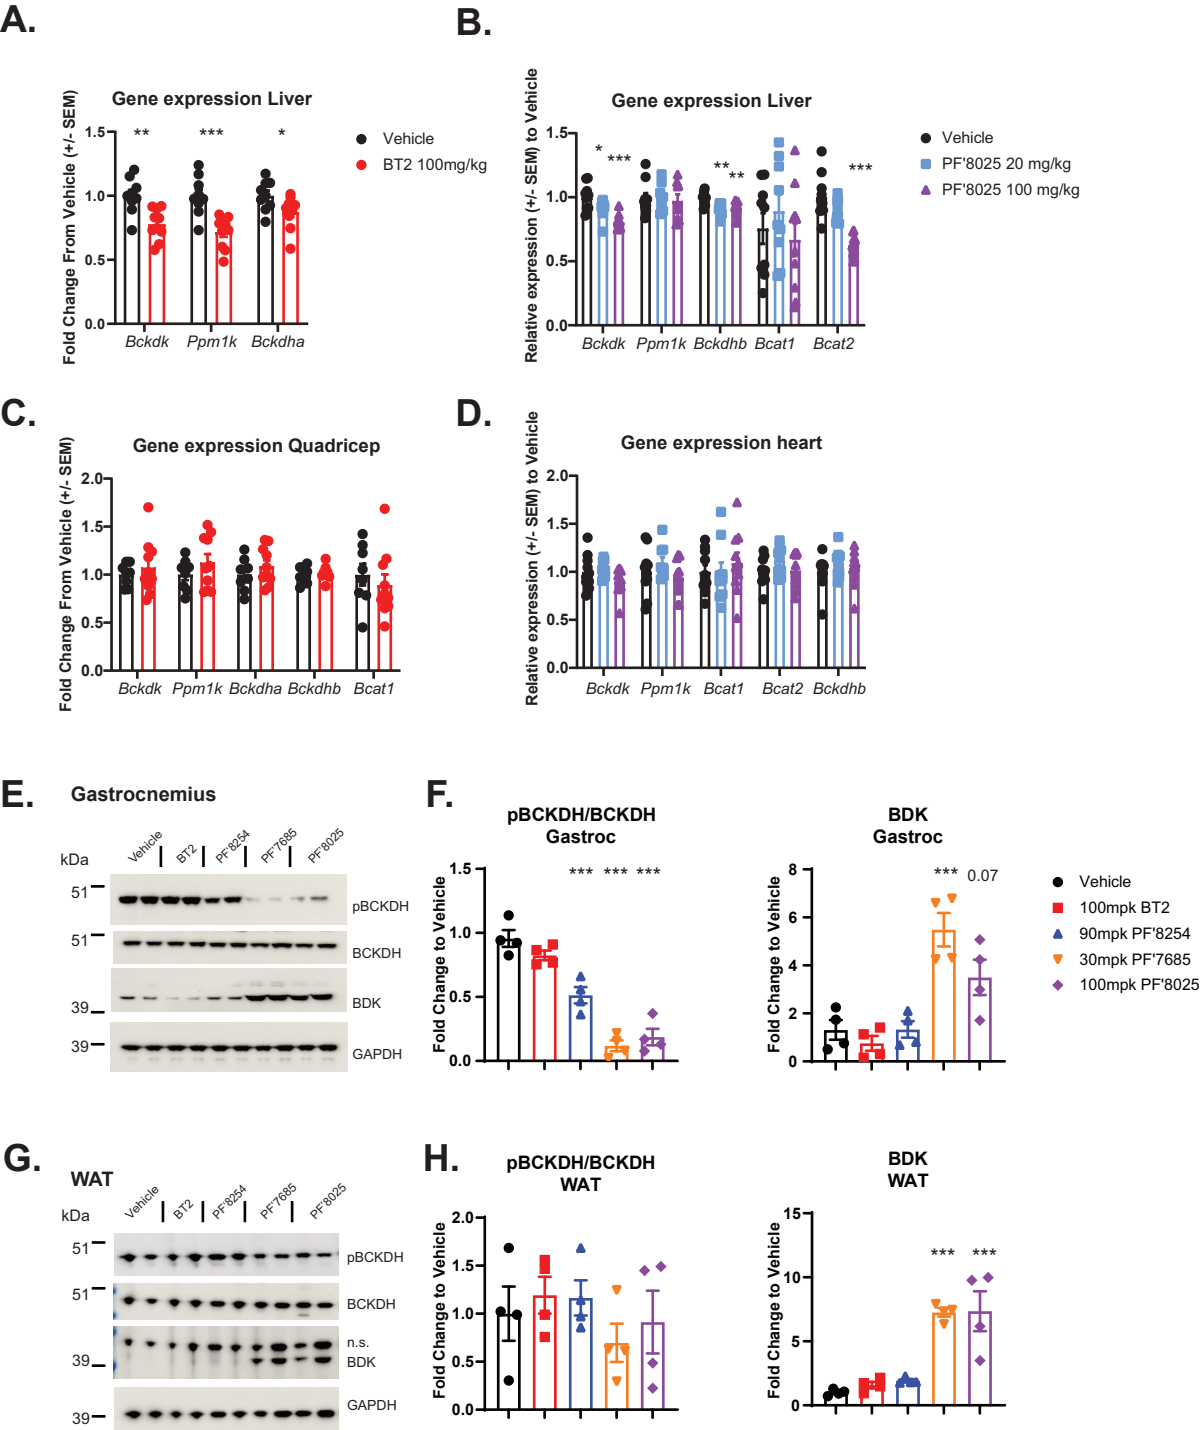

**Supplementary Figure 8. BDK mRNA levels not driving BDK protein changes with BT2 or PF-07238025 and BDK protein is upregulated in multiple tissues with thiazoles. A-D.** One hour post final compound dose, tissue was harvested. mRNA was isolated, and qPCR was performed from HFD-fed animals that had been treated with BT2 or PF-07238025 (N=8-10 animals/group; a Welch two-sample t-test was performed for statistics). **A.** Liver after BT2 treatment (\*\*;  $p=0.001$ , \*\*\*;  $p=0.00047$ , \*;  $p=0.03$ ). **B.** Liver after PF-07238025 treatment (\*;  $p=0.041$ , \*\*;  $p=0.005$ ,  $0.008$  \*\*\*;  $p<0.0001$ ). **C.** Quadriceps after BT2 treatment. **D.** Heart after PF-07238025 treatment. **E-H.** One hour post final compound dose, tissue was harvested and lysed, and Western blots were performed from HFD-fed animals that had been treated with BT2, PF-07208254, PF-07238025 or PF-07247685 (N=4 animals/group; a one-way ANOVA with Tukey HSD test was performed for statistics). **E.** Gastrocnemius tissue, **F.** Densitometry of **E.** (\*\*\*;  $p<0.0001$ ) **G.** White adipose tissue (WAT). **H.** Densitometry of **G.** (\*\*\*;  $p<0.0001$ ) Data represent the mean  $\pm$  SEM. \*;  $p<0.05$ ; \*\*;  $p<0.01$ , \*\*\*;  $p<0.005$ . Source data are provided as a Source Data file.

**A.**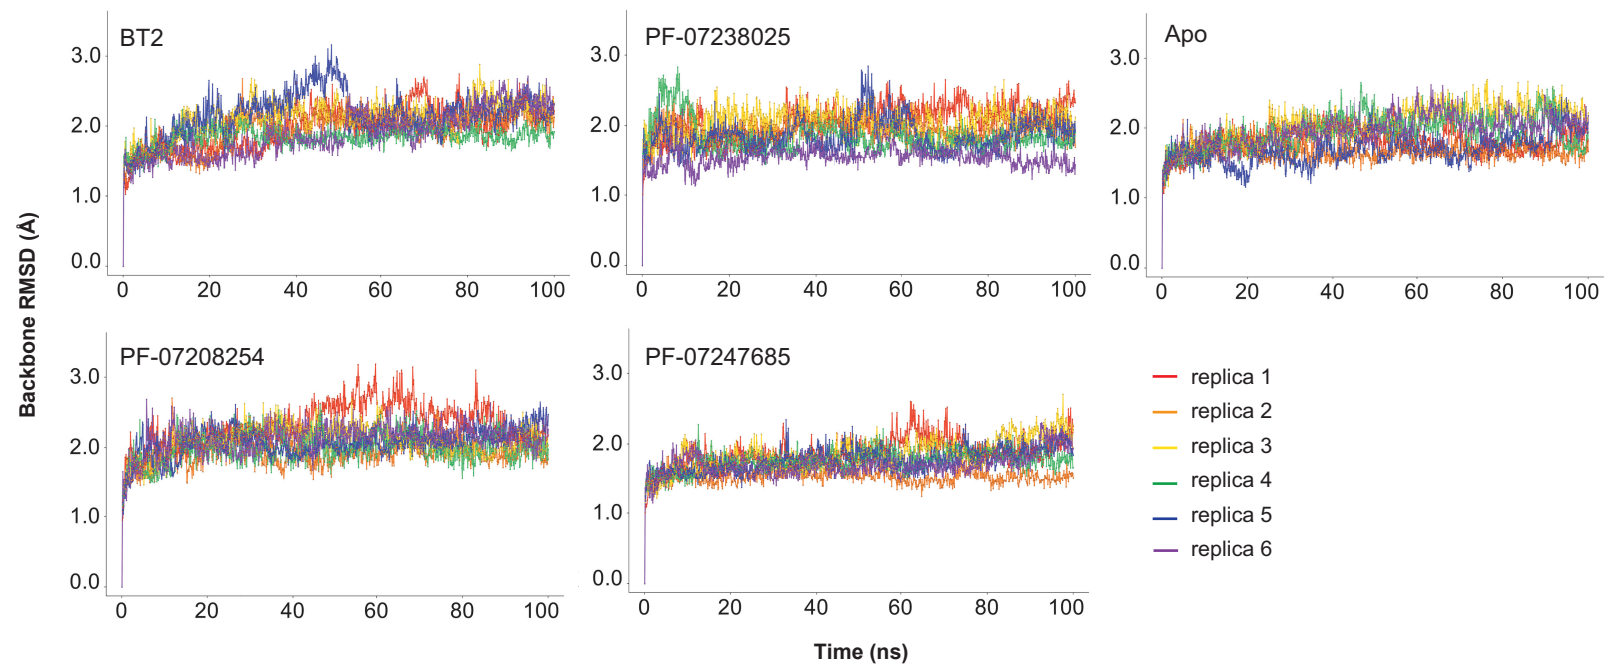**B.**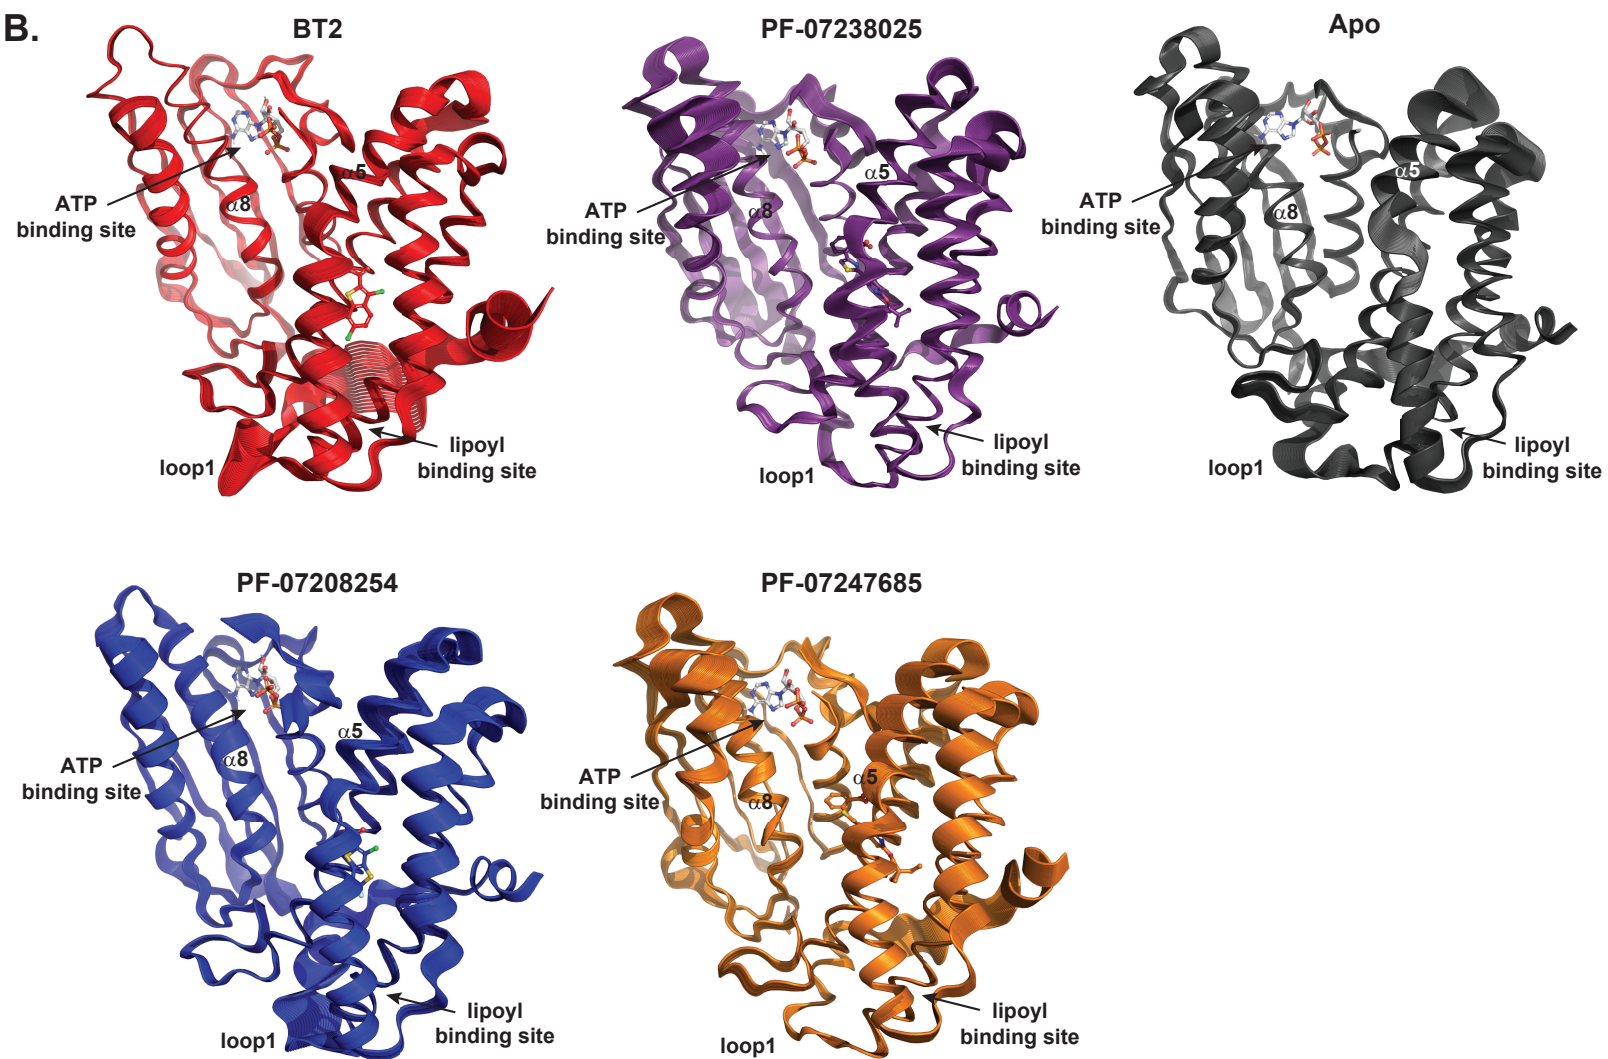

**Supplementary Figure 9. BDK MD trajectories are stable over the course of the simulations; Loop 1 shows dynamic differences. A.** Root-mean-square deviation (RMSD) of BDK backbone atoms with respect to the starting structure over six replicas of 100 ns when bound to BT2, PF-07208254, PF-07238025, PF-07247685 and apo. **B.** Visualizations of the first principal component of BDK bound to destabilizers BT2 (red) and PF-07208254 (blue), stabilizers PF-07238025 (purple) and PF-07247685 (orange), and apo (black).

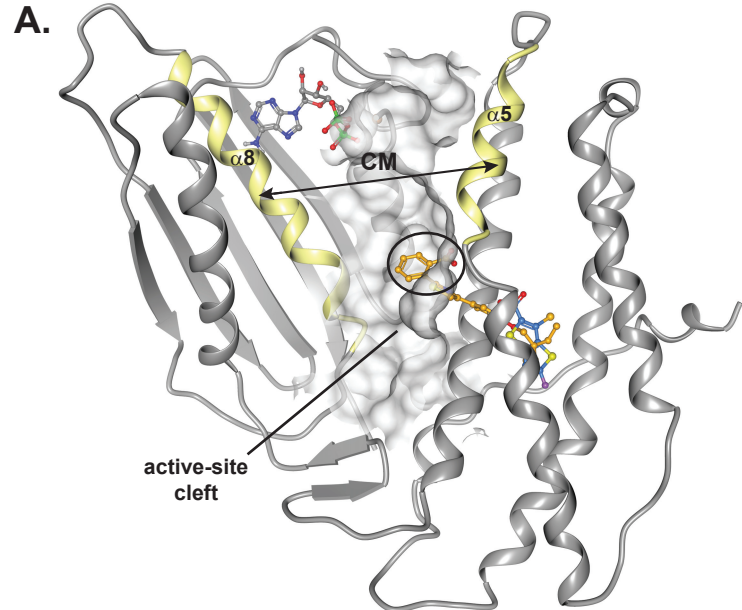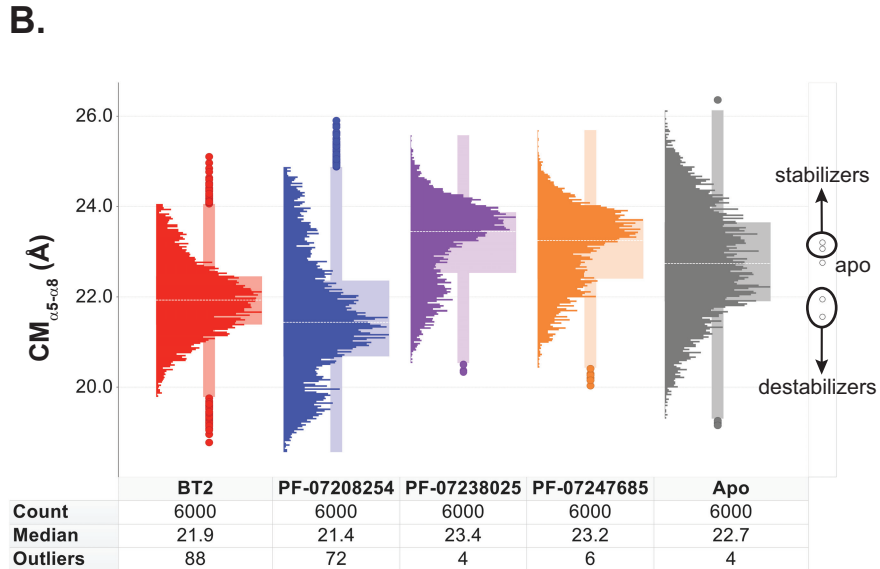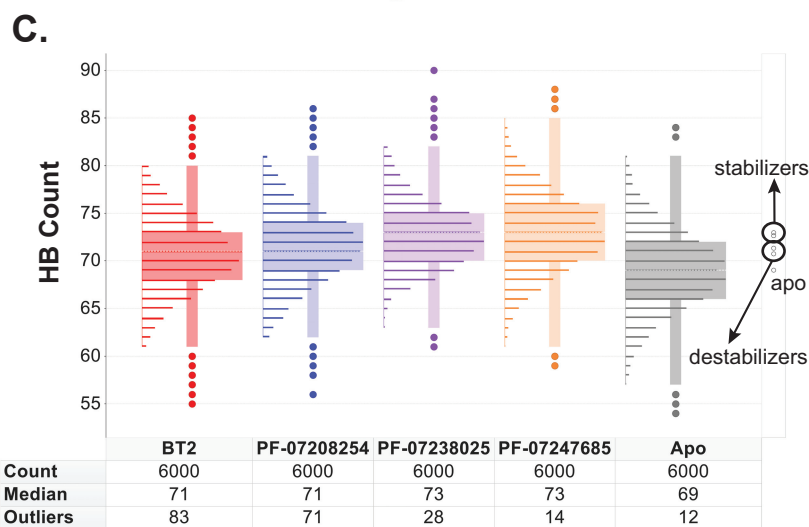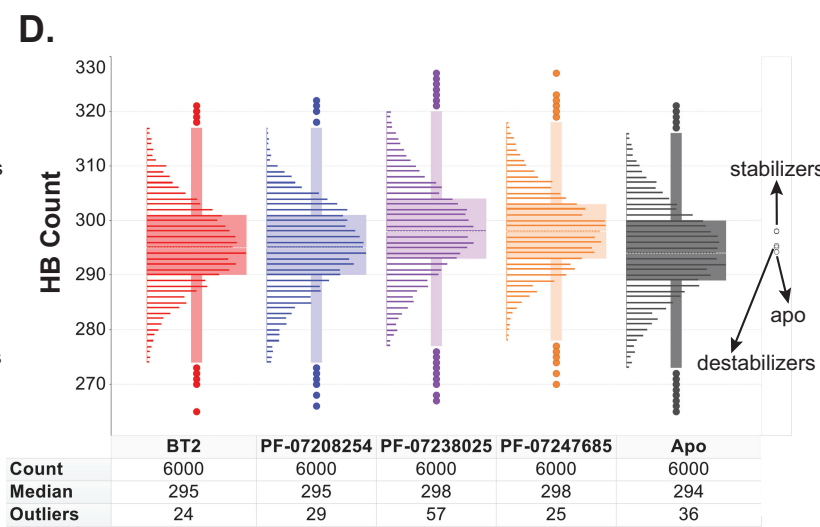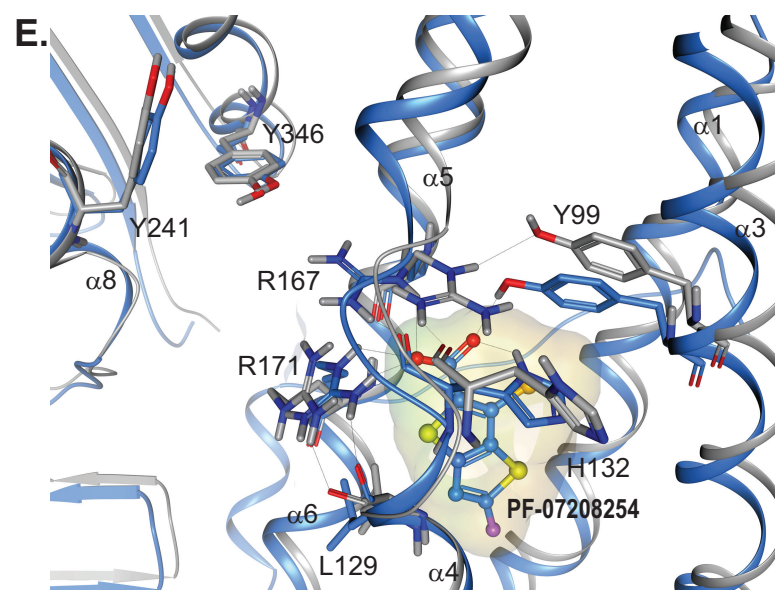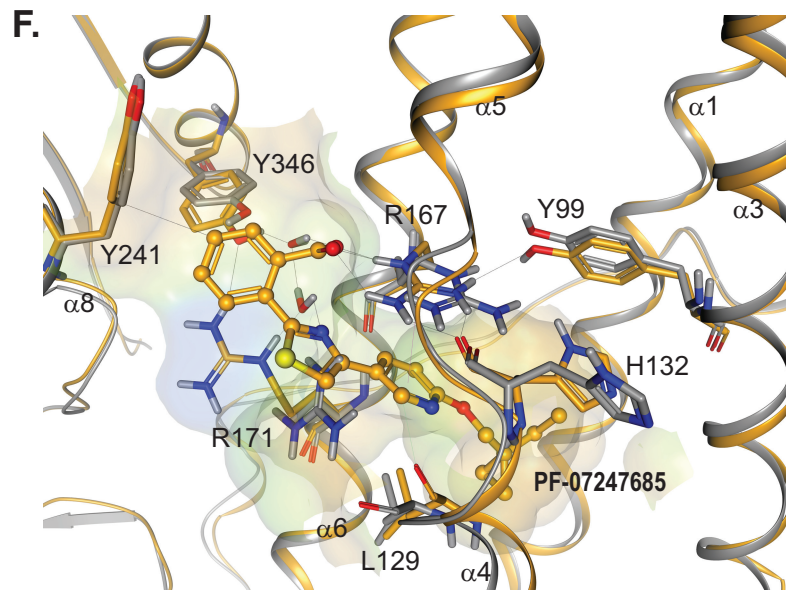

**Supplementary Figure 10. BDK active-site cleft narrows and fewer hydrogen bonds are observed with binding of destabilizers and widens with binding of stabilizers. A.**

Illustration of active-site cleft (gray surface) where E1 binds and is phosphorylated by BDK, and center-of-mass (CM) distance between helices  $\alpha 5$  and  $\alpha 8$  (yellow). Stabilizers PF-07238025 (not shown) and PF-07247685 (orange) protrude into the active-site cleft, physically blocking E1 from binding. **B.** Distribution of BDK  $CM_{\alpha 5-\alpha 8}$  over MD simulations. **C.** Distribution of the number of hydrogen bonds formed by residues in the BDK lipoyl-binding pocket over the course of MD simulations. **D.** Distribution of the number of hydrogen bonds formed by all BDK residues over the course of MD simulations. **E.** Differences in protein-protein and protein-ligand interactions when BDK is bound to a destabilizer (PF-07208254, blue) compared to apo structure (gray). **F.** Differences in protein-protein and protein-ligand interactions when BDK is bound to a stabilizer (PF-07247685, orange) compared to apo structure (gray).



1 **Supplementary Tables**

2 **Supplementary Table 1. Potency of BDK inhibitors**

| Compound  | Structure                                                                         | BDK in vitro IC <sub>50</sub> (nM) <sup>a</sup> | BDK SPR K <sub>D</sub> (nM) <sup>a</sup> | Human skeletal myocyte IC <sub>50</sub> (nM) <sup>a</sup> |
|-----------|-----------------------------------------------------------------------------------|-------------------------------------------------|------------------------------------------|-----------------------------------------------------------|
| <b>S1</b> | 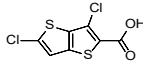 | 600 ± 51                                        | 75 ± 2.0 <sup>b</sup>                    | ND <sup>c</sup>                                           |
| <b>S2</b> |  | 210 ± 10                                        | 270 ± 31                                 | 930 ± 120                                                 |
| <b>S3</b> |  | 1200 ± 490                                      | 5800 ± 4400                              | >60,000                                                   |

3 <sup>a</sup>Potency values are ± standard error with an N ≥ 3 except where noted.

4 <sup>b</sup>N = 2

5 <sup>c</sup>Not Determined

6  
7

8

9 **Supplementary Table 2. Cerep Bioprint Off-Target Panel**

| Target                           | Format            | Single Point Compound Test Concentration (uM) or IC <sub>50</sub> /EC <sub>50</sub> | % Inhibition or IC <sub>50</sub> /EC <sub>50</sub> |             |             |
|----------------------------------|-------------------|-------------------------------------------------------------------------------------|----------------------------------------------------|-------------|-------------|
|                                  |                   |                                                                                     | PF-07208254                                        | PF-07238025 | PF-07247685 |
| Abl Kinase                       | Kinase Inhibition | 10                                                                                  |                                                    | 9           | 11          |
| Abl Kinase                       | Kinase Inhibition | 100                                                                                 | 42                                                 |             |             |
| Acetylcholinesterase             | Enzyme Inhibition | 10                                                                                  |                                                    | 11          | -4          |
| Acetylcholinesterase             | Enzyme Inhibition | 100                                                                                 | -4                                                 |             |             |
| Adenosine A1 Receptor            | Agonism           | 10                                                                                  |                                                    | -1          | 0           |
| Adenosine A1 Receptor            | Agonism           | 100                                                                                 | 0                                                  |             |             |
| Adenosine A2a Receptor           | Agonism           | 10                                                                                  |                                                    | 1           | 1           |
| Adenosine A2a Receptor           | Agonism           | 100                                                                                 | 0                                                  |             |             |
| Adrenergic Alpha 1a Adrenoceptor | Agonism           | 10                                                                                  |                                                    | -1          | 1           |
| Adrenergic Alpha 1a Adrenoceptor | Agonism           | 100                                                                                 | 8                                                  |             |             |
| Adrenergic Alpha 1a Adrenoceptor | Antagonism        | 10                                                                                  |                                                    | 13          | 14          |
| Adrenergic Alpha 1a Adrenoceptor | Antagonism        | 100                                                                                 | 21                                                 |             |             |
| Adrenergic Alpha 2a receptor     | Agonism           | 10                                                                                  |                                                    | -2          | 0           |
| Adrenergic Alpha 2a receptor     | Agonism           | 100                                                                                 | -1                                                 |             |             |
| Adrenergic Alpha 2b Adrenoceptor | Agonism           | 10                                                                                  |                                                    | 0           | -1          |
| Adrenergic Alpha 2b Adrenoceptor | Agonism           | 100                                                                                 | -4                                                 |             |             |
| Adrenergic Alpha 2b Adrenoceptor | Antagonism        | 10                                                                                  |                                                    | 9           | -1          |
| Adrenergic Alpha 2b Adrenoceptor | Antagonism        | 100                                                                                 | -2                                                 |             |             |
| Adrenergic Beta 1 Adrenoceptor   | Agonism           | 10                                                                                  |                                                    | 3           | 6           |
| Adrenergic Beta 1 Adrenoceptor   | Agonism           | 100                                                                                 | 2                                                  |             |             |
| Adrenergic Beta 1 Adrenoceptor   | Antagonism        | 10                                                                                  |                                                    | 20          | 27          |

|                                                   |                     |                  |            |     |     |
|---------------------------------------------------|---------------------|------------------|------------|-----|-----|
| Adrenergic Beta 1 Adrenoceptor                    | Antagonism          | 100              | 8          |     |     |
| Adrenergic Beta 2 Adrenoceptor                    | Agonism             | 10               |            | 4   | -6  |
| Adrenergic Beta 2 Adrenoceptor                    | Agonism             | 100              | -5         |     |     |
| Adrenergic Beta 2 Adrenoceptor                    | Antagonism          | 10               |            | 8   | 3   |
| Adrenergic Beta 2 Adrenoceptor                    | Antagonism          | 100              | 10         |     |     |
| AMPA Receptor                                     | Ion Channel Binding | 10               |            | -13 | 5   |
| AMPA Receptor                                     | Ion Channel Binding | 100              | 7          |     |     |
| Androgen Receptor                                 | NHR Binding         | 10               |            | -6  | -8  |
| Androgen Receptor                                 | NHR Binding         | 100              | -4         |     |     |
| Angiotensin 1                                     | Agonism             | 10               |            | -4  | -8  |
| Angiotensin 1                                     | Agonism             | 100              | 3          |     |     |
| Angiotensin 1                                     | Antagonism          | 10               |            | -1  | 5   |
| Angiotensin 1                                     | Antagonism          | 100              | 18         |     |     |
| Angiotensin Converting Enzyme                     | Enzyme Inhibition   | 10               |            | -33 | -31 |
| Angiotensin Converting Enzyme                     | Enzyme Inhibition   | 100              | -4         |     |     |
| Aurora A Kinase                                   | Kinase Inhibition   | 10               |            | -8  | -7  |
| Aurora A Kinase                                   | Kinase Inhibition   | 100              | 15         |     |     |
| Cannabinoid CB1                                   | Agonism             | 10               |            | 32  | 39  |
| Cannabinoid CB1                                   | Agonism             | 100              | 55         |     |     |
| Cannabinoid CB1                                   | Agonism             | EC <sub>50</sub> | 180,000 nM |     |     |
| Cannabinoid CB1                                   | Antagonism          | 10               |            | -1  | -4  |
| Cannabinoid CB1                                   | Antagonism          | 100              | -10        |     |     |
| Cholecystokinin 2                                 | Agonism             | 10               |            | 2   | -8  |
| Cholecystokinin 2                                 | Agonism             | 100              | 0          |     |     |
| Choline Transporter                               | Transporter Binding | 10               |            | -8  | -12 |
| Choline Transporter                               | Transporter Binding | 100              | -15        |     |     |
| Corticotrophin Releasing Factor 1 (CRF1) Receptor | Agonism             | 10               |            | -1  | 4   |
| Corticotrophin Releasing Factor 1 (CRF1) Receptor | Agonism             | 100              | -2         |     |     |
| Corticotrophin Releasing Factor 1 (CRF1) Receptor | Antagonism          | 10               |            | 32  | 11  |
| Corticotrophin Releasing Factor 1 (CRF1) Receptor | Antagonism          | 100              | 39         |     |     |
| Cyclooxygenase 2                                  | Enzyme Inhibition   | 10               |            | 3   | 4   |
| Cyclooxygenase 2                                  | Enzyme Inhibition   | 100              | 0          |     |     |
| Delta Opioid Receptor                             | Agonism             | 10               |            | -2  | -1  |
| Delta Opioid Receptor                             | Agonism             | 100              | -2         |     |     |
| Dopamine 2S                                       | Agonism             | 10               |            | -6  | -17 |
| Dopamine 2S                                       | Agonism             | 100              | -29        |     |     |
| Dopamine 2S                                       | Antagonism          | 10               |            | 3   | -7  |
| Dopamine 2S                                       | Antagonism          | 100              | -7         |     |     |
| Dopamine D1                                       | Agonism             | 10               |            | 1   | 4   |
| Dopamine D1                                       | Agonism             | 100              | -4         |     |     |
| Dopamine D1                                       | Antagonism          | 10               |            | 10  | 5   |
| Dopamine D1                                       | Antagonism          | 100              | -5         |     |     |
| Dopamine Transporter                              | Transporter Binding | 10               |            | -4  | -1  |
| Dopamine Transporter                              | Transporter Binding | 100              | 7          |     |     |
| EGFR Kinase                                       | Kinase Inhibition   | 10               |            | -1  | -6  |
| EGFR Kinase                                       | Kinase Inhibition   | 100              | 19         |     |     |
| Endothelin A                                      | Agonism             | 10               |            | -1  | -4  |
| Endothelin A                                      | Agonism             | 100              | 4          |     |     |
| GABA Transporter                                  | Transporter Binding | 10               |            | -9  | -8  |
| GABA Transporter                                  | Transporter Binding | 100              | 0          |     |     |
| GABAa (benzodiazepine site)                       | Ion Channel Binding | 10               |            | -14 | 13  |

|                                            |                     |                  |           |     |     |
|--------------------------------------------|---------------------|------------------|-----------|-----|-----|
| GABAa (benzodiazepine site)                | Ion Channel Binding | 100              | -9        |     |     |
| GABAa (Cl Channel)                         | Ion Channel Binding | 10               |           | 11  | 19  |
| GABAa (Cl Channel)                         | Ion Channel Binding | 100              | 19        |     |     |
| GABAa1 Receptor                            | Ion Channel Binding | 10               |           | -28 | -21 |
| GABAa1 Receptor                            | Ion Channel Binding | 100              | -12       |     |     |
| Glucocorticoid Receptor                    | NHR Binding         | 10               |           | -2  | 0   |
| Glucocorticoid Receptor                    | NHR Binding         | 100              | 4         |     |     |
| Histamine H1                               | Agonism             | 10               |           | -4  | -5  |
| Histamine H1                               | Agonism             | 100              | -1        |     |     |
| Histamine H1                               | Antagonism          | 10               |           | 13  | -2  |
| Histamine H1                               | Antagonism          | 100              | 17        |     |     |
| Histamine H2                               | Agonism             | 10               |           | 2   | 1   |
| Histamine H2                               | Agonism             | 100              | 0         |     |     |
| Histamine H3                               | Agonism             | 10               |           | 28  | 4   |
| Histamine H3                               | Agonism             | 100              | 15        |     |     |
| Kappa Opioid                               | Agonism             | 10               |           | -18 | -7  |
| Kappa Opioid                               | Agonism             | 100              | -3        |     |     |
| Kdr Kinase (VEGFR2)                        | Kinase Inhibition   | 10               |           | 5   | -11 |
| Kdr Kinase (VEGFR2)                        | Kinase Inhibition   | 100              | 57        |     |     |
| Kdr Kinase (VEGFR2)                        | Kinase Inhibition   | IC <sub>50</sub> | 76,000 nM |     |     |
| LCK Kinase                                 | Kinase Inhibition   | 10               |           | 0   | -2  |
| LCK Kinase                                 | Kinase Inhibition   | 100              | -4        |     |     |
| L-Type Ca2+ Channel (dihydropyridine site) | Ion Channel Binding | 10               |           | -8  | -2  |
| L-Type Ca2+ Channel (dihydropyridine site) | Ion Channel Binding | 100              | 1         |     |     |
| L-Type Ca2+ Channel (diltiazem site)       | Ion Channel Binding | 10               |           | -30 | 24  |
| L-Type Ca2+ Channel (diltiazem site)       | Ion Channel Binding | 100              | -8        |     |     |
| L-Type Ca2+ Channel (verapamil site)       | Ion Channel Binding | 10               |           | -3  | 1   |
| L-Type Ca2+ Channel (verapamil site)       | Ion Channel Binding | 100              | -6        |     |     |
| Melanocortin MC2 Receptor                  | Agonism             | 10               |           | 0   | 0   |
| Melanocortin MC2 Receptor                  | Agonism             | 100              | 0         |     |     |
| Melanocortin MC2 Receptor                  | Antagonism          | 10               |           | 39  | 18  |
| Melanocortin MC2 Receptor                  | Antagonism          | 100              | -4        |     |     |
| Monoamine Oxidase A                        | Enzyme Inhibition   | 10               |           | 13  | 12  |
| Monoamine Oxidase A                        | Enzyme Inhibition   | 100              | 0         |     |     |
| Mu Opioid                                  | Antagonism          | 10               |           | -9  | -3  |
| Mu Opioid                                  | Antagonism          | 100              | 2         |     |     |
| Mu Opioid                                  | Agonism             | 10               |           | -1  | -3  |
| Mu Opioid                                  | Agonism             | 100              | 16        |     |     |
| Muscarinic 1                               | Agonism             | 10               |           | -1  | 1   |
| Muscarinic 1                               | Agonism             | 100              | -1        |     |     |
| Muscarinic 1                               | Antagonism          | 10               |           | 14  | 9   |
| Muscarinic 1                               | Antagonism          | 100              | 0         |     |     |
| Muscarinic 2                               | Agonism             | 10               |           | 21  | 3   |
| Muscarinic 2                               | Agonism             | 100              | 39        |     |     |
| Muscarinic 2                               | Antagonism          | 10               |           | -12 | 2   |
| Muscarinic 2                               | Antagonism          | 100              | -7        |     |     |
| Muscarinic 3                               | Agonism             | 10               |           | -5  | -1  |
| Muscarinic 3                               | Agonism             | 100              | 0         |     |     |
| Muscarinic 3                               | Antagonism          | 10               |           | 7   | 3   |
| Muscarinic 3                               | Antagonism          | 100              | 18        |     |     |

|                                                                     |                     |                  |           |           |           |
|---------------------------------------------------------------------|---------------------|------------------|-----------|-----------|-----------|
| Na+ Channel (site 2)                                                | Ion Channel Binding | 10               |           | -2        | 31        |
| Na+ Channel (site 2)                                                | Ion Channel Binding | 100              | -2        |           |           |
| Neurokinin Nk1                                                      | Agonism             | 10               |           | -2        | -4        |
| Neurokinin Nk1                                                      | Agonism             | 100              | -3        |           |           |
| Nicotinic Acetylcholine Receptor                                    | Ion Channel Binding | 10               |           | 1         | -1        |
| Nicotinic Acetylcholine Receptor                                    | Ion Channel Binding | 100              | -12       |           |           |
| Nicotinic Acetylcholine Receptor (alpha4, beta2 subunit containing) | Ion Channel Binding | 10               |           | -2        | -4        |
| Nicotinic Acetylcholine Receptor (alpha4, beta2 subunit containing) | Ion Channel Binding | 100              | -6        |           |           |
| NMDA Receptor (glutamate site)                                      | Ion Channel Binding | 10               |           | -2        | -5        |
| NMDA Receptor (glutamate site)                                      | Ion Channel Binding | 100              | 3         |           |           |
| NMDA Receptor (PCP binding site)                                    | Ion Channel Binding | 10               |           | -2        | 0         |
| NMDA Receptor (PCP binding site)                                    | Ion Channel Binding | 100              | -13       |           |           |
| Norepinephrine Transporter                                          | Transporter Binding | 10               |           | -11       | 6         |
| Norepinephrine Transporter                                          | Transporter Binding | 100              | -15       |           |           |
| P38alpha MAP Kinase                                                 | Kinase Inhibition   | 10               |           | 2         | 3         |
| P38alpha MAP Kinase                                                 | Kinase Inhibition   | 100              | 35        |           |           |
| Phosphodiesterase 3B                                                | Enzyme Inhibition   | 10               |           | 5         | -16       |
| Phosphodiesterase 3B                                                | Enzyme Inhibition   | 100              | -9        |           |           |
| Phosphodiesterase 4D2                                               | Enzyme Inhibition   | 10               |           | 12        | -24       |
| Phosphodiesterase 4D2                                               | Enzyme Inhibition   | 100              | -11       |           |           |
| PPAR-gamma                                                          | NHR Binding         | 10               |           | 10        | 21        |
| PPAR-gamma                                                          | NHR Binding         | 100              | 62        |           |           |
| PPAR-gamma                                                          | NHR Binding         | IC <sub>50</sub> | 86,000 nM | 26,000 nM | 50,000 nM |
| Serotonin 5-HT1a Receptor                                           | Agonism             | 10               |           | -2        | -1        |
| Serotonin 5-HT1a Receptor                                           | Agonism             | 100              | -1        |           |           |
| Serotonin 5-HT1b Receptor                                           | Agonism             | 10               |           | -3        | 34        |
| Serotonin 5-HT1b Receptor                                           | Agonism             | 100              | 39        |           |           |
| Serotonin 5-HT2a                                                    | Agonism             | 10               |           | 0         | 3         |
| Serotonin 5-HT2a                                                    | Agonism             | 100              | -5        |           |           |
| Serotonin 5-HT2b                                                    | Agonism             | 10               |           | 4         | -5        |
| Serotonin 5-HT2b                                                    | Agonism             | 100              | -5        |           |           |
| Serotonin 5-HT3                                                     | Ion Channel Binding | 10               |           | -9        | 0         |
| Serotonin 5-HT3                                                     | Ion Channel Binding | 100              | -14       |           |           |
| Serotonin 5-HT4e                                                    | Agonism             | 10               |           | 2         | 0         |
| Serotonin 5-HT4e                                                    | Agonism             | 100              | 6         |           |           |
| Serotonin Transporter                                               | Transporter Binding | 10               |           | -10       | 2         |
| Serotonin Transporter                                               | Transporter Binding | 100              | -3        |           |           |
| Src Kinase                                                          | Kinase Inhibition   | 10               |           | 5         | -8        |
| Src Kinase                                                          | Kinase Inhibition   | 100              | 11        |           |           |
| Thyrotropin Releasing Hormone 1 (TRH1) Receptor                     | Agonism             | 10               |           | -2        | 4         |
| Thyrotropin Releasing Hormone 1 (TRH1) Receptor                     | Agonism             | 100              | 4         |           |           |
| Thyrotropin Releasing Hormone 1 (TRH1) Receptor                     | Antagonism          | 10               |           | 20        | 10        |
| Thyrotropin Releasing Hormone 1 (TRH1) Receptor                     | Antagonism          | 100              | -5        |           |           |
| Vasopressin 1a                                                      | Agonism             | 10               |           | -1        | -1        |
| Vasopressin 1a                                                      | Agonism             | 100              | 16        |           |           |

10

11 Key compounds were tested against a broad off-target panel to determine selectivity for BDK  
12 activity. PF-07238025 and PF-07247685 were tested in single point at 10 µM. Because of its  
13 weaker activity PF-07208254 was tested in single point at 100 µM. No targets showed >50%

14 activity for PF-07238025 and PF-07247685. Three targets (shaded in table) showed >50% activity  
 15 @ 100  $\mu$ M for PF-07208254. These were followed up with dose response curves and  
 16 demonstrated high micromolar activity. Because of the weak activity and large margins between  
 17 BDK potency and these off-target potencies, pharmacology due to these off-targets in not  
 18 anticipated within the context of the included experiments.

19

20 **Supplementary Table 3. Kinase Off-Target Panel**

| Target                                                                                         | ATP = Km<br>% Inhibition @ 10 $\mu$ M |             |             | ATP = 1 mM<br>% Inhibition @ 10 $\mu$ M |             |             |
|------------------------------------------------------------------------------------------------|---------------------------------------|-------------|-------------|-----------------------------------------|-------------|-------------|
|                                                                                                | PF-07208254                           | PF-07238025 | PF-07247685 | PF-07208254                             | PF-07238025 | PF-07247685 |
| ABL Proto-Oncogene 1 Non-receptor Tyrosine Kinase (ABL1)                                       | 9.0                                   | 7.0         | 5.1         | -0.5                                    | 3.8         | 0.9         |
| Aurora Kinase A (AURKA)                                                                        | 9.4                                   | 5.8         | 8.9         | -2.6                                    | 0.6         | 2.2         |
| Bruton agammaglobulinemia Tyrosine Kinase (BTK)                                                | 5.9                                   | 5.4         | -0.7        | 0.8                                     | -3.6        | 3.1         |
| Cyclin Dependent Kinase 1 (CDK2/Cyclin-A)                                                      | 14.6                                  | 3.4         | 1.2         | -1.2                                    | 2.9         | -1.4        |
| Checkpoint Kinase 1 (CHEK1)                                                                    | 4.6                                   | 3.8         | -3.1        | 4.3                                     | 1.5         | 4.5         |
| Checkpoint Kinase 2 (CHEK2)                                                                    | 6.7                                   | -2.7        | 3.8         | -0.7                                    | 1.0         | -0.2        |
| Casein Kinase 1 delta (CKI-delta)                                                              | 9.1                                   | 2.3         | 6.0         | NT                                      | NT          | NT          |
| MAP Kinase Interacting serine/threonine Kinase 1 (MKNK1)                                       | 15.1                                  | -2.3        | 0.5         | NT                                      | NT          | NT          |
| NUAK family, SNF1-like kinase, 1 (NUAK1)                                                       | 10.3                                  | 1.4         | -18.2       | NT                                      | NT          | NT          |
| DNA-activated, catalytic polypeptide protein kinase (PRKDC)                                    | 8.3                                   | -4.7        | 5.4         | NT                                      | NT          | NT          |
| CSK tyrosine Kinase                                                                            | 2.9                                   | 4.8         | 4.3         | NT                                      | NT          | NT          |
| C-terminal Src Kinase (v-src sarcoma (Schmidt-Ruppin A-2) viral oncogene homolog (avian) (SRC) | 5.6                                   | 6.6         | 17.3        | -4.8                                    | 7.8         | -1.0        |
| Epidermal Growth Factor Receptor (erythroblastic leukemia viral (v-erb)                        | -0.9                                  | 3.9         | -2.6        | -7.2                                    | -2.3        | 1.2         |
| EPH Receptor A2 (EPHA2)                                                                        | 0.5                                   | 7.0         | 0.6         | -5.6                                    | 4.7         | 5.6         |
| ERBB-4 receptor protein tyrosine kinase (Tyrosine kinase-type cell surface receptor HER4)      | -11.4                                 | 1.4         | 7.2         | NT                                      | NT          | NT          |
| Fibroblast Growth Factor Receptor 1 (FGFR1)                                                    | -0.5                                  | 6.4         | 8.8         | -0.5                                    | 3.3         | 2.1         |
| Glycogen Synthase Kinase 3 Beta (GSK3B)                                                        | 9.7                                   | 4.0         | 11.0        | 0.7                                     | 1.6         | 3.7         |
| Tyrosine-protein kinase HCK (Haemopoietic cell kinase)                                         | 9.9                                   | 5.6         | 4.5         | NT                                      | NT          | NT          |
| I $\kappa$ B kinase beta subunit (IKK BETA)                                                    | 4.8                                   | 1.0         | -0.0        | NT                                      | NT          | NT          |
| Insulin Receptor (INSR)                                                                        | 3.1                                   | 5.9         | 3.4         | 0.0                                     | 4.4         | -0.4        |
| Interleukin 1 Receptor Associated Kinase 4 (IRAK4)                                             | 6.2                                   | 3.4         | -0.9        | -2.1                                    | 5.7         | 2.9         |
| Janus Kinase 3 (JAK3)                                                                          | 0.9                                   | 0.4         | 0.8         | -4.1                                    | -1.7        | -0.0        |
| Kinase Insert Domain Receptor (a type III receptor tyrosine kinase) (KDR, VEGFR2)              | 1.1                                   | 4.1         | 2.0         | 5.6                                     | 3.0         | 0.1         |
| LCK Proto-Oncogene Src Family Tyrosine Kinase, lymphocyte-specific protein kinase (LCK)        | 20.6                                  | 8.1         | 5.9         | 9.9                                     | 8.5         | 3.0         |
| Mitogen-Activated Protein Kinase 1 (MAPK1)                                                     | 9.4                                   | 0.3         | 7.0         | 2.8                                     | 5.2         | 2.4         |

|                                                                                       |      |       |      |       |       |      |
|---------------------------------------------------------------------------------------|------|-------|------|-------|-------|------|
| Mitogen-Activated Protein Kinase-Activated Protein Kinase 2 (MAPKAPK2)                | 3.4  | -0.3  | 2.2  | -1.5  | 4.4   | 3.3  |
| MAP/Microtubule Affinity Regulating Kinase 1 (MARK1)                                  | 2.1  | 6.0   | 4.3  | 8.4   | 2.4   | 7.5  |
| MET Proto-Oncogene Receptor Tyrosine Kinase (hepatocyte growth factor receptor) (MET) | -3.1 | 2.8   | -0.3 | -10.2 | -2.7  | -2.2 |
| Misshapen-like Kinase 1 (zebrafish)                                                   | -3.3 | 19.7  | 21.9 | NT    | NT    | NT   |
| Mitogen and stress-activated protein kinase-1 (MSK1)                                  | 2.7  | 1.5   | -1.4 | NT    | NT    | NT   |
| Serine/Threonine Kinase 3 (STE20 homolog, yeast) (STK3)                               | 5.5  | -9.3  | -1.8 | -2.3  | -1.7  | -7.6 |
| NEK6                                                                                  | 7.1  | 6.5   | 1.2  | NT    | NT    | NT   |
| Ribosomal protein S6 kinase                                                           | 2.5  | 3.5   | 2.7  | NT    | NT    | NT   |
| p21 protein (Cdc42/Tac)-activated kinase 4 (PAK4)                                     | 6.0  | 4.2   | 8.3  | 0.9   | 2.8   | 3.7  |
| Proto-oncogene kinase PIM-1                                                           | 44.5 | -2.6  | -2.6 | NT    | NT    | NT   |
| Pim-2 Proto-Oncogene Serine/Threonine Kinase (PIM2)                                   | 22.3 | -8.4  | 0.1  | -5.2  | 1.3   | 0.9  |
| Protein Kinase cAMP-dependent, Catalytic Subunit Alpha (PRKACA)                       | 2.7  | 3.2   | 2.3  | -2.4  | 2.6   | 0.3  |
| AKT Kinase (Protein Kinase B), v-akt murine thymoma viral oncogene homolog 1 (AKT1)   | 6.7  | 2.2   | 2.4  | -0.8  | -0.6  | -0.8 |
| MAP kinase activated protein kinase 5 (MAPKAPK5)                                      | 6.6  | 1.4   | 2.3  | NT    | NT    | NT   |
| Rho Associated, Coiled-Coil Containing Protein Kinase 1 (ROCK1)                       | 3.6  | -0.8  | 2.4  | 0.8   | -1.1  | -0.9 |
| Rho kinase (ROCK2)                                                                    | -5.8 | -3.5  | 5.5  | NT    | NT    | NT   |
| Ribosomal protein S6 kinase II alpha 1 (Rsk1)                                         | 3.3  | 1.2   | 2.4  | NT    | NT    | NT   |
| Ribosomal protein S6 kinase II alpha 3 (Rsk2)                                         | -0.7 | -11.1 | -1.6 | NT    | NT    | NT   |
| Mitogen-activated protein kinase 12 (MAPK12/ERK6/P38 gamma)                           | 13.3 | 5.6   | 4.6  | NT    | NT    | NT   |
| Mitogen-activated protein kinase 13 (MAPK13/P38 gamma)                                | 3.6  | 0.1   | -0.7 | NT    | NT    | NT   |
| Serum/Glucocorticoid Regulated Kinase 1 (SGK1)                                        | -0.1 | -11.1 | 0.7  | 1.9   | -12.3 | -5.1 |
| Serine kinase SRPK1                                                                   | 2.8  | 30.4  | 12.6 | NT    | NT    | NT   |
| TEK Receptor Tyrosine Kinase, endothelial (TEK)                                       | 0.3  | 3.6   | 0.6  | 0.7   | 3.6   | 8.6  |
| Neurotrophic Receptor Tyrosine Kinase, type 1 (NTRK1)                                 | 5.6  | 9.6   | 14.5 | 5.8   | 15.5  | 10.0 |
| Eukaryotic elongation factor-2 kinase                                                 | 2.3  | 0.9   | -1.5 | NT    | NT    | NT   |
| Mitogen-activated protein kinase kinase kinase 9 (MAPK3K9) (mixed lineage kinase 1)   | 3.2  | -1.1  | 6.3  | NT    | NT    | NT   |
| RAC-beta serine/threonine kinase (AKT2 kinase)                                        | 0.2  | 1.5   | 5.5  | NT    | NT    | NT   |
| TAO Kinase 2 (TAOK2)                                                                  | -2.5 | -0.4  | -4.7 | 1.4   | -1.0  | -1.8 |
| Aurora kinase B (AURKB)                                                               | 3.0  | 9.9   | 17.3 | NT    | NT    | NT   |
| Calcium/Calmodulin Dependent Protein Kinase II Alpha (CAMK2A)                         | 6.8  | -0.5  | 2.8  | -0.3  | -0.8  | 3.5  |
| Casein Kinase 1 Alpha 1 (CSNK1A1)                                                     | 9.2  | 1.6   | 3.1  | -0.6  | 3.8   | 2.1  |
| Casein Kinase 2 Alpha prime polypeptide (CSNK2A2)                                     | 24.5 | 2.1   | 7.5  | 7.3   | 0.9   | 1.9  |
| Dual-specificity tyrosine-(Y)-phosphorylation regulated kinase (DYRK)                 | 11.8 | 7.1   | 2.1  | NT    | NT    | NT   |
| FKBP-rapamycin associated protein (FRAP, mTOR)                                        | 5.1  | -0.1  | 0.4  | NT    | NT    | NT   |

|                                                                      |                    |                    |                    |      |      |      |
|----------------------------------------------------------------------|--------------------|--------------------|--------------------|------|------|------|
| Mitogen-Activated Protein Kinase Kinase Kinase 4 (MAPK4K4)           | 11.9               | 17.2               | 25.5               | -7.5 | -0.7 | 3.2  |
| Serine/Threonine-Protein Kinase MASK (MST4)                          | 16.7               | 5.9                | 2.9                | 3.7  | 0.1  | -2.9 |
| Myosin Light Chain Kinase 2 (MYLK2)                                  | -3.6               | 1.1                | 1.4                | -0.1 | -1.6 | 1.7  |
| Phosphorylase B kinase gamma catalytic chain skeletal muscle isoform | 1.8                | 0.8                | 2.2                | NT   | NT   | NT   |
| PLK1 kinase                                                          | 1.8                | 3.0                | 10.1               | NT   | NT   | NT   |
| Phosphatidylinositol 4-kinase, catalytic, beta (PI4KB)               | 7.9                | 3.1                | 7.1                | NT   | NT   | NT   |
| Phosphatidylinositol-3-kinase, class 3 (PIK3C3)                      | 7.3                | 4.0                | 3.0                | NT   | NT   | NT   |
| Phosphatidylinositol-3-kinase, catalytic, delta polypeptide (PIK3CD) | 6.4                | 12.2               | -7.0               | NT   | NT   | NT   |
| Sphingosine kinase 1 (SPHK1)                                         | -15.9              | -86.4              | -82.5              | NT   | NT   | NT   |
| 3-phosphoinositide dependent protein kinase-1 (PDPK1)                | -3.2               | 1.3                | -0.6               | -3.1 | 0.8  | 2.0  |
| Phosphatidylinositol-3-kinase, class 2, alpha polypeptide (PIK3C2A)  | 2.6                | -11.1              | -4.2               | NT   | NT   | NT   |
| Phosphatidylinositol-3-kinase, catalytic, beta polypeptide (PIK3CB)  | 3.1                | -3.0               | -3.5               | NT   | NT   | NT   |
| Phosphatidylinositol-3-kinase, catalytic, gamma polypeptide (PIK3CG) | 4.8                | -1.5               | -4.6               | NT   | NT   | NT   |
| Phosphatidylinositol-3-kinase, class 2, alpha polypeptide (PIK3C2A)  | 1.6                | -6.3               | 5.5                | NT   | NT   | NT   |
| Mitogen-Activated Protein Kinase 14 (MAPK14)                         | 3.0                | 0.5                | 3.5                | 4.0  | -3.7 | 7.1  |
| MAP/microtubule affinity-regulating kinase 3 (MARK3)                 | 5.0                | 3.1                | 2.1                | NT   | NT   | NT   |
| Protein kinase, DNA-activated, catalytic polypeptide (PRKDC)         | 8.3                | -4.7               | 5.4                | NT   | NT   | NT   |
| Protein kinase C, alpha (PRKCA)                                      | 3.8                | -2.0               | 14.8               | NT   | NT   | NT   |
| Protein kinase C, beta II isoform (PRKCB2)                           | -1.7               | 2.6                | 9.4                | 1.9  | -1.7 | 4.0  |
| <b>ATP = 10 uM</b>                                                   |                    |                    |                    |      |      |      |
| <b>% Inhibition @ 10 uM</b>                                          |                    |                    |                    |      |      |      |
| <b>Target</b>                                                        | <b>PF-07208254</b> | <b>PF-07238025</b> | <b>PF-07247685</b> |      |      |      |
| Phosphatidylinositol 4-kinase, catalytic, alpha (PI4KA)              | 8.2                | 2.6                | -3.1               |      |      |      |
| Phosphatidylinositol-3-kinase, class 2, beta polypeptide (PIK3C2B)   | 3.5                | -6.7               | 2.0                |      |      |      |
| Sphingosine kinase 2 (SPHK2)                                         | -11.8              | -9.4               | 3.9                |      |      |      |
| <b>ATP = 100 uM</b>                                                  |                    |                    |                    |      |      |      |
| <b>% Inhibition @ 10 uM</b>                                          |                    |                    |                    |      |      |      |
| Mitogen-activated protein kinase 8 (MAPK8 / JNK1)                    | -0.6               | -0.2               | 2.1                |      |      |      |
| Mitogen-activated protein kinase 9 (MAPK9 / JNK2)                    | -3.0               | 5.4                | 4.3                |      |      |      |
| MEK1                                                                 | 4.1                | 10.1               | 11.2               |      |      |      |
| Calcium/calmodulin-dependent protein kinase I (CAMK1)                | -7.9               | -3.7               | -5.1               |      |      |      |
| <b>Lantha Binding</b>                                                |                    |                    |                    |      |      |      |
| <b>% Inhibition @ 10 uM</b>                                          |                    |                    |                    |      |      |      |
| TTK protein kinase (TTK)                                             | 16.2               | 4.1                | 3.6                |      |      |      |

|                                                                         |      |      |      |
|-------------------------------------------------------------------------|------|------|------|
| Calcium/calmodulin-dependent protein kinase kinase 2, beta (CAMKK2)     | 7.8  | 1.8  | 1.8  |
| Myosin light chain kinase (MYLK)                                        | 3.3  | 1.0  | 1.3  |
| MAP kinase interacting serine/threonine kinase 2 (MKNK2)                | 11.8 | -2.1 | 1.2  |
| TGF-beta activated kinase 1/MAP3K7 binding protein 1 (MAP3K7IP1)        | 2.6  | 3.6  | -1.9 |
| Mitogen-activated protein kinase kinase kinase 11 (MAP3K11)             | 6.8  | -3.5 | -2.2 |
| Protein kinase N2 (PKN2)                                                | 8.1  | 4.1  | -1.7 |
| Protein kinase, AMP-activated, alpha 1 beta 1 gamma 2 complex (PRKA A1) | 5.9  | -1.8 | 0.5  |
| Dual-specificity tyrosine-(Y)-phosphorylation regulated kinase 2 (DYRK) | 29.2 | 13.3 | 1.9  |
| Mitogen-activated protein kinase 15 (MAPK15)                            | 18.3 | -4.9 | 2.4  |
| Transforming growth factor, beta receptor II (70/80kDa) (TGFB2)         | 15.9 | 4.7  | 15.1 |

21

22 Key compounds were tested against multiple Invitrogen kinase panels, which included 96 kinases,  
 23 to determine kinase selectivity. PF-07208254, PF-07238025, and PF-07247685 were tested at  
 24 10  $\mu$ M compound concentration for % inhibition of select protein and lipid kinases at the ATP  
 25 concentrations noted in the table. Several other kinases were probed for inhibition of binding in a  
 26 Lantha screen format assay as noted in the table. All % inhibition values were < 30% with the  
 27 exceptions (shaded in table) of PF-07208254 showing 44.5% inhibition of PIM-1 at  $K_m$  ATP and  
 28 PF-07238025 showing 30.4% inhibition of Serine Kinase SRPK1 at  $K_m$  ATP. In a follow-up dose  
 29 response, PF-07208254 demonstrated an  $IC_{50}$  = 14.4  $\mu$ M for PIM-1. Because of this weak activity  
 30 and large margins between BDK potency (PF-07208254 BDK  $IC_{50}$  = 110 nM) and PF-07238025  
 31 BDK  $IC_{50}$  = 4.5 nM), and these off-target potencies, pharmacology due to these off-targets is not  
 32 anticipated within the context of the included experiments.

33

34

### 35 X-ray Crystal Structures:

36

#### 37 **Supplementary Table 4. Data collection and refinement statistics (molecular replacement)**

|                                    | PF-07208254              | S3                     | PF-07247685               |
|------------------------------------|--------------------------|------------------------|---------------------------|
| <b>Data collection</b>             |                          |                        |                           |
| Space group                        | P6 <sub>4</sub> 22       | P4 <sub>1</sub> 22     | P4 <sub>1</sub> 22        |
| Cell dimensions                    |                          |                        |                           |
| <i>a</i> , <i>b</i> , <i>c</i> (Å) | 132.27, 132.27, 121.70   | 117.8, 117.8, 154.8    | 118.370, 118.370, 156.230 |
| $\alpha$ , $\beta$ , $\gamma$ (°)  | 90, 90, 120              | 90, 90, 90             | 90, 90, 90                |
| Resolution (Å)                     | 114.5-2.55 (2.70-2.55) * | 117.8-2.79 (3.08-2.79) | 47.7-3.15(3.23-3.15)      |
| $R_{merge}$                        | 0.15(2.49)               | 0.112(2.74)            | 0.113(2.07)               |
| $I / \sigma I$                     | 13.5(1.2)                | 17.3(1.7)              | 17.7(1.6)                 |
| Completeness (spherical, %)        | 86.2(28.3)               | 63.1(12.7)             | 93.3(54.7)                |
| Completeness (ellipsoidal, %)      | 90.4(39.9)               | 86.0(73.5)             | 96.0(89.2)                |
| Redundancy                         | 18.0(13.9)               | 12.8(12.5)             | 13.1(13.2)                |



---

**Refinement**

|                                     |             |             |             |
|-------------------------------------|-------------|-------------|-------------|
| Resolution (Å)                      | 114.5-2.54  | 117.8(2.79) | 47.7(3.15)  |
| No. reflections                     | 18,176      | 17,480      | 18,537      |
| $R_{\text{work}} / R_{\text{free}}$ | 0.231/0.270 | 0.248/0.296 | 0.240/0.279 |
| No. atoms                           |             |             |             |
| Protein                             | 2,564       | 5,042       | 5,163       |
| Ligand/ion                          | 42          | 124         | 121         |
| Water                               | 28          | 12          | 13          |
| $B$ -factors <sup>‡</sup>           |             |             |             |
| Protein                             | 80.7        | 97.2/163    | 99.9/142    |
| Ligand                              | 81.3        | 79.8/155    | 95.3/119    |
| Solvent                             | 63.9        | 64.02/132   | 74.5        |
| Wilson Plot                         | 83.56       | 92.4        | 102.3       |
| R.m.s. deviations                   |             |             |             |
| Bond lengths (Å)                    | 0.008       | 0.009       | 0.008       |
| Bond angles (°)                     | 0.91        | 0.92        | 0.91        |

---

38 \*One crystal was used for each data set. Values in parentheses are for the highest-resolution shell. Anisotropic  
39 resolution cutoff was used during data merging and scaling, and both spherical and ellipsoidal completeness are  
40 reported.

41 <sup>‡</sup>For **S3** and PF-07247685, the average  $B$  factors of protein and bound inhibitors are listed separately for chain A and  
42 B in the asymmetric unit. Chain A is more ordered than chain B, and chain B was tightly restrained to chain A  
43 during model building and refinements. There is only one chain in the PF-07208254 crystal.

44  
45

## 46 **Supplementary Methods**

47

### 48 **Chemical Synthesis:**

49

50 BT2 was obtained from Enamine in 95% purity (Monmouth Junction, NJ, USA); Catalog number  
51 EN300-00845. Compound **S1** can be synthesized according to a literature procedure, and  
52 showed 98.2% purity as determined by LCMS.<sup>11</sup> Compound **S2** is commercially available from  
53 multiple vendors including Aurora Fine Chemicals LLC (San Diego, CA); catalog number  
54 182.043.609. Material used herein was 96.5% pure as determined by LCMS. Compound **S3** is  
55 commercially available from multiple vendors including Aurora Fine Chemicals LLC (San Diego,  
56 CA); catalog number 100.479.432. Material used herein was 95.7% pure as determined by LCMS.  
57 The synthesis of all other included compounds is below.

### 58 **Methods:**

59 Reactions were performed in air or, when oxygen- or moisture-sensitive reagents or  
60 intermediates were employed, under an inert atmosphere (nitrogen or argon). When appropriate,  
61 reaction apparatuses were dried under dynamic vacuum using a heat gun, and anhydrous  
62 solvents (Sure-Seal™ products from Aldrich Chemical Company, Milwaukee, Wisconsin or  
63 DriSolv™ products from EMD Chemicals, Gibbstown, NJ) were employed. Commercial solvents  
64 and reagents were used without further purification. When indicated, reactions were heated by  
65 microwave irradiation using Biotage Initiator or Personal Chemistry Emrys Optimizer microwaves  
66 or the like. Reaction progress was monitored using thin-layer chromatography (TLC), liquid  
67 chromatography-mass spectrometry (LCMS) and high-performance liquid chromatography  
68 (HPLC) analyses. TLC was performed on pre-coated silica gel plates with a fluorescence  
69 indicator (254 nm excitation wavelength) and visualized under UV light and/or with I<sub>2</sub>, KMnO<sub>4</sub>,  
70 CoCl<sub>2</sub>, phosphomolybdic acid, and/or ceric ammonium molybdate stains. LCMS data were  
71 acquired on an Agilent 1100 Series instrument with a Leap Technologies autosampler, Gemini  
72 C18 columns, acetonitrile/water gradients, and either trifluoroacetic acid, formic acid, or  
73 ammonium hydroxide modifiers or similar equipment. The column eluent was analyzed using a  
74 Waters ZQ mass spectrometer scanning in both positive and negative ion modes from 100 to  
75 1200 Da. Other similar instruments were also used. HPLC data were acquired on an Agilent 1100  
76 Series instrument using Gemini or XBridge C18 columns, acetonitrile/water gradients, and either  
77 trifluoroacetic acid or ammonium hydroxide modifiers and comparable equipment. Purifications  
78 were performed by medium performance liquid chromatography (MPLC) using Isco CombiFlash  
79 Companion, AnaLogix IntelliFlash 280, Biotage SP1, or Biotage Isolera One instruments and pre-  
80 packed Isco RediSep or Biotage Snap silica cartridges and the like. Chiral purifications were  
81 performed by chiral supercritical fluid chromatography (SFC) using Berger or Thar instruments  
82 and similar instruments; ChiralPAK-AD, -AS, -IC, Chiralcel-OD, or -OJ columns; and CO<sub>2</sub>  
83 mixtures with methanol, ethanol, isopropanol, or acetonitrile, alone or modified using  
84 trifluoroacetic acid or iPrNH<sub>2</sub>. UV detection was used to trigger fraction collection.

85 Mass spectrometry data are reported from LCMS analyses. Mass spectrometry (MS) was  
86 performed via atmospheric pressure chemical ionization (APCI), electrospray ionization (ESI),  
87 electron impact ionization (EI) or electron scatter (ES) ionization sources. High resolution mass  
88 spectrometry (HRMS) was performed on a Sciex TripleTOF 5600+ (Sciex, Ontario, Canada) with  
89 DuoSpray ionization source. The LC instrument includes an Agilent (Agilent Technologies,  
90 Wilmington, DE) 1200 binary pump, Agilent 1200 autosampler, Agilent 1200 column  
91 compartment, and Agilent 1200 DAD. The instrument acquisition and data handling were done  
92 with Sciex Analyst TF version 1.7.1. Prior to acquisition, instrument was calibrated with less than  
93 5 ppm accuracy. During acquisition, a calibration run was performed initially and after every 5  
94 injections using the Sciex positive polarity tuning mix. Elution Conditions: Column: Waters XSelect

95 HSS T3, 2.1 x 50mm, 2.5  $\mu\text{m}$  particle size; Column Temperature 60  $^{\circ}\text{C}$ ; Solvent A: Water (0.1%  
 96 formic acid); Solvent B: Acetonitrile (0.1% formic acid); Gradient: Initial 5% B, hold for 0.10 min,  
 97 5-95% B in 2.8 min, 95-5% B in 0.20 min, 3.5 min total runtime; Flow rate 0.8 mL/min. TOF  
 98 Conditions: ESI in Positive Mode; The spray chamber: Gas 1 and 2 at 60, curtain gas at 40,  
 99 temperature 600  $^{\circ}\text{C}$ , IonSpray voltage 5500 V, declustering potential 100, collision energy 10.  
 100 The acquisition was done in TOF MS mode with range of 100-2000 amu with accumulation time  
 101 of 0.20 sec. ESI in Negative Mode; The spray chamber: Gas 1 and 2 at 60, curtain gas at 40,  
 102 temperature 600  $^{\circ}\text{C}$ , IonSpray voltage -4500 V, declustering potential -100, collision energy -10.  
 103 The acquisition is done in TOF MS mode with range of 100-2000 amu with accumulation time of  
 104 0.20 sec. Proton, carbon, and fluorine nuclear magnetic spectroscopy ( $^1\text{H}$  NMR,  $^{13}\text{C}$  NMR,  $^{19}\text{F}$   
 105 NMR) chemical shifts are given in parts per million downfield from tetramethylsilane and were  
 106 recorded on 101, 300, 400, 500, or 600 MHz Varian spectrometers. Chemical shifts are expressed  
 107 in parts per million (ppm,  $\delta$ ) referenced to the deuterated solvent residual peaks. The peak shapes  
 108 are described as follows: s, singlet; d, doublet; t, triplet; q, quartet; quin, quintet; m, multiplet; br  
 109 s, broad singlet; app, apparent. Analytical SFC data were acquired on a Berger analytical  
 110 instrument as described above. Optical rotation data were acquired on a PerkinElmer model 343  
 111 polarimeter using a 1 dm cell. Silica gel chromatography was performed primarily using a medium  
 112 pressure Biotage or ISCO systems using columns pre-packaged by various commercial vendors  
 113 including Biotage and ISCO.

114 Unless otherwise noted, chemical reactions were performed at room temperature (about  
 115 23 degrees Celsius). HPLC, UPLC, LCMS, and SFC retention times were measured using the  
 116 methods noted in the procedures. Products were generally dried under vacuum before being  
 117 carried on to further reactions or submitted for biological testing. Mass spectrometry data is  
 118 reported from liquid chromatography-mass spectrometry (LCMS), atmospheric pressure  
 119 chemical ionization (APCI) instrumentation. Chemical shifts for nuclear magnetic resonance  
 120 (NMR) data are expressed in parts per million (ppm,  $\delta$ ) referenced to residual peaks from the  
 121 deuterated solvents employed.

122

123 Synthesis of 3-chloro-5-fluorothiopheno[3,2-b]thiophene-2-carboxylic acid (**PF-07208254**)

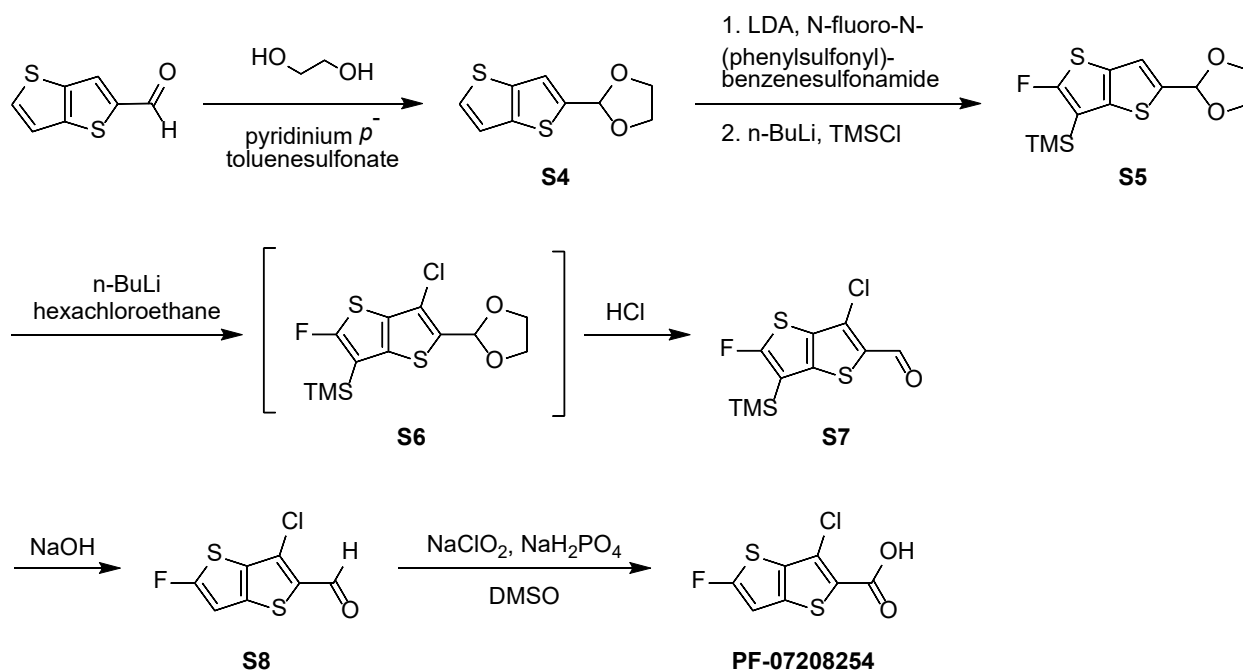

124

125

126 Step 1. Synthesis of 2-(thieno[3,2-*b*]thiophen-2-yl)-1,3-dioxolane (**S4**)

127 To a solution of thieno[3,2-*b*]thiophene-2-carbaldehyde (180 g, 1.07 mol) in cyclohexane (3 L,  
128 0.36 M) was added pyridinium *p*-toluenesulfonate (26.9 g, 0.107 mol) and ethylene glycol (597  
129 mL, 10.7 mol). The reaction mixture was heated to 90 °C for 40 hours, in an apparatus equipped  
130 with a Dean-Stark trap. The resulting mixture was diluted with sodium chloride (aq., 2 L) and the  
131 resulting organic layer was separated. The aqueous layer was extracted with ethyl acetate (3 x  
132 1 L) and the combined organic layers were dried over sodium sulfate, filtered, and concentrated  
133 *in vacuo* to afford **S4** as a light brown solid (230 g). This material was used for next step directly.  
134 <sup>1</sup>H NMR (400 MHz, DMSO-*d*<sub>6</sub>) δ 7.68 (d, *J* = 5.3 Hz, 1H), 7.57 (s, 1H), 7.43 (dd, *J* = 5.3, 0.7 Hz,  
135 1H), 6.10 (s, 1H), 4.07 – 4.00 (m, 2H), 4.00 – 3.93 (m, 2H); HRMS (*m/z*): [M+H]<sup>+</sup> calcd. for  
136 C<sub>9</sub>H<sub>9</sub>O<sub>2</sub>S<sub>2</sub><sup>+</sup>, 213.0038; found, 213.0038; 2.01 min; 96%. HPLC: 8.649 min, 95% pure.

137

138 Step 2. Synthesis of [5-(1,3-dioxolan-2-yl)-2-fluorothieno[3,2-*b*]thiophen-3-yl](trimethyl)silane  
139 (**S5**).

140 A solution of **S4** (120.0 g, 564 mmol) in a mixture of toluene (1.5 L) and tetrahydrofuran (0.9 L)  
141 was cooled to –78 °C. Lithium diisopropylamide (2.0 M solution in tetrahydrofuran / heptane /  
142 ethylbenzene, 367 mL, 1.3 eq.) was added in a drop-wise manner at a rate such that the internal  
143 temperature of the reaction mixture remained below –72 °C. The reaction mixture was stirred at  
144 this temperature over 1 hour followed by dropwise addition of a *N*-fluoro-*N*-  
145 (phenylsulfonyl)benzenesulfonamide (231.7 g, 734 mmol) solution in tetrahydrofuran (5 volumes)  
146 at –78 °C. The reaction mixture was stirred at this temperature for 1 hour followed by addition of  
147 sodium hydroxide (15%, 20 volumes). Once at ambient temperature, the aqueous phase was  
148 extracted with isopropyl acetate (5 volumes). The combined organic layers were dried over  
149 sodium sulfate, filtered, and concentrated *in vacuo* to afford 120 g of a crude brown solid. This  
150 material was used for next step directly.

151 This solid (120 g) was dissolved in tetrahydrofuran (2.3 L), cooled to –78 °C, and treated in a  
152 drop-wise manner with *n*-butyllithium (2.5 M solution in hexanes; 417 mL, 2 eq.) at a rate that  
153 maintained the internal reaction temperature below –72 °C. After the reaction mixture had been  
154 stirred at –78 °C for 1 hour, a solution of trimethylsilyl chloride (113.2 g, 2 eq.) in tetrahydrofuran  
155 (1 volume) was added, while again maintaining the internal reaction temperature below –72 °C.  
156 The reaction mixture was then stirred at –78 °C for 1 hour, whereupon an aliquot was partitioned  
157 between diethyl ether and saturated aqueous sodium bicarbonate solution. GCMS analysis of  
158 the organic layer of this aliquot indicated conversion to **S5**: GCMS *m/z* 302.1 [M<sup>+</sup>]. The reaction  
159 mixture was quenched at –78 °C by addition of saturated aqueous sodium bicarbonate solution  
160 (10 volumes), and the resulting mixture was allowed to warm to room temperature. The aqueous  
161 phase was extracted with isopropyl acetate (5 volumes). The organic layer was concentrated and  
162 purified by silica gel (3 g/g), eluted with heptanes : methyl *tert*-butyl ether (10:1). The organic  
163 phase was concentrated to 2-3 volumes, then slurried with heptanes (3 volumes). The mixture  
164 was filtered, and the residue dried under nitrogen to give **S5** as a yellowish solid (150 g, 88%  
165 yield). <sup>1</sup>H NMR (400 MHz, methanol-*d*<sub>4</sub>) δ 7.24 (s, 1H), 6.00 (s, 1H), 4.04 – 3.96 (m, 2H), 3.95 –  
166 3.86 (m, 2H), 0.29 (s, 9H); <sup>19</sup>F NMR (400 MHz, methanol-*d*<sub>4</sub>) δ -113.92 (s, 1H).

167

168 Step 3. Synthesis of 3-chloro-5-fluoro-6-(trimethylsilyl)thieno[3,2-*b*]thiophene-2-carbaldehyde  
169 (**S7**)

170 A tetrahydrofuran (1.8 L, 15 volumes) solution of **S5** (150 g, 1 eq.) was cooled down to  $-78\text{ }^{\circ}\text{C}$   
171 followed by dropwise addition of *n*-BuLi (2.5 M solution in hexanes, 260 mL, 1.3 eq), at a rate  
172 that maintained the internal temperature below  $-72\text{ }^{\circ}\text{C}$ . After completion of the addition, the  
173 reaction mixture was allowed to stir at  $-78\text{ }^{\circ}\text{C}$  for 1 hour, whereupon a solution of  
174 hexachloroethane (165.7 g, 1.4 eq.) in tetrahydrofuran (5 volumes) was added dropwise, in a  
175 manner that maintained the internal reaction temperature below  $-72\text{ }^{\circ}\text{C}$ . The reaction mixture  
176 was stirred for a further 1 hour at  $-78\text{ }^{\circ}\text{C}$ . The reaction mixture, containing **S6**, was quenched  
177 with HCl (4 N, 5 volumes) and stirred at room temperature for 6 hours. The aqueous mixture was  
178 extracted with isopropyl acetate (5 volumes). The organic phase was concentrated to 2-3  
179 volumes, then slurried with isopropyl alcohol (3 volumes). The mixture was filtered, and the  
180 residue was dried under nitrogen to give crude material as a yellowish solid. The crude product  
181 was slurried with a tetrahydrofuran : water co-mixture (1/1; 20 volumes) and the residue was then  
182 dried under nitrogen to afford **S7** as a yellowish solid (87 g, 60% yield).  $^1\text{H}$  NMR (400 MHz,  
183 DMSO- $d_6$ )  $\delta$  9.87 (s, 1H), 0.26 (s, 9H);  $^{13}\text{C}$  NMR (101 MHz, DMSO- $d_6$ )  $\delta$  182.36, 174.04, 171.07,  
184 134.64 (d,  $J = 4.8$  Hz), 127.40, 115.98, 115.75, -0.51 (d,  $J = 1.8$  Hz);  $^{19}\text{F}$  NMR (400 MHz, DMSO-  
185  $d_6$ )  $\delta$  -100.08 (s, 1H); HRMS (m/z):  $[\text{M}+\text{H}]^+$  calcd. for  $\text{C}_{10}\text{H}_{11}\text{ClFOS}_2\text{Si}^+$ , 292.9688; found,  
186 292.9688; 3.01 min; 100%. HPLC: 11.806 min, 100% pure.

187

#### 188 Step 4. Synthesis of 3-chloro-5-fluorothieno[3,2-b]thiophene-2-carbaldehyde (**S8**)

189 To a methanol (30 mL) : water (30 mL) solution of **S7** (2.96 g, 10.1 mmol) was added an aqueous  
190 solution of sodium hydroxide (1 M, 0.20 mL). The resulting solution was stirred at  $50\text{ }^{\circ}\text{C}$  for 1 h.  
191 After that time additional water was added to yield a thick slurry. The beige precipitated solid was  
192 filtered, rinsed with a methanol : water (1:1 ratio; 12 mL) solution to yield **S8** (2.17 g 89% yield)  
193 as a beige solid after drying at  $50\text{ }^{\circ}\text{C}$  over 16 h.  $^1\text{H}$  NMR (400 MHz, DMSO- $d_6$ )  $\delta$  9.99 (s, 1H),  
194 7.49 (d,  $J = 1.7$  Hz, 1H);  $^{13}\text{C}$  NMR (400 MHz, DMSO- $d_6$ )  $\delta$  182.08, 169.83, 166.85, 139.70,  
195 134.83, 126.90, 105.75;  $^{19}\text{F}$  NMR (400 MHz, DMSO- $d_6$ )  $\delta$  -111.67 (s, 1H); HRMS (m/z):  $[\text{M}+\text{H}]^+$   
196 calcd. for  $\text{C}_7\text{H}_3\text{ClFOS}_2^+$ , 220.9292; found, 220.9290; 2.26 min; 94%; HPLC: 9.393 min, 90%  
197 pure; LC/MS: 0.817 min / 220.7  $[\text{M}+\text{H}]$ .

198

#### 199 Step 5. Synthesis of 3-chloro-5-fluorothieno[3,2-b]thiophene-2-carboxylic acid (**PF-07208254**)

200 A solution of sodium chlorite (20.5 g, 227 mmol) and sodium dihydrogen phosphate (27.5 g, 229  
201 mmol) in water (100 mL) was added slowly, in a drop-wise manner, to a  $0\text{ }^{\circ}\text{C}$  solution of **S8** (10.0  
202 g, 45.3 mmol) in a mixture of dimethyl sulfoxide (56 mL) and 2-methyltetrahydrofuran (100 mL).  
203 The reaction mixture was then allowed to warm to room temperature and was stirred at that  
204 temperature until the starting material had been completely consumed, as assessed by LCMS  
205 analysis (approximately 2 hours). The reaction mixture was then poured in portions into a cold ( $0$   
206  $^{\circ}\text{C}$ ) saturated aqueous solution of sodium thiosulfate pentahydrate (300 mL), at a rate that  
207 maintained the temperature of the resulting mixture below  $15\text{ }^{\circ}\text{C}$ . After stirring at  $10\text{ }^{\circ}\text{C}$  for 20  
208 minutes, the mixture was diluted with ethyl acetate (200 mL). The aqueous layer was extracted  
209 with ethyl acetate (2 x 200 mL), and the combined organic layers were washed with saturated  
210 aqueous sodium chloride solution, dried over magnesium sulfate, filtered, and concentrated *in*  
211 *vacuo*. The residue was stirred in a mixture of heptane and ethyl acetate (9:1, 50 mL) for about  
212 1 hour. The resulting solid was collected via filtration and washed with a mixture of heptane and  
213 ethyl acetate (9:1, 2 x 20 mL), providing a white solid (10.58 g). This was stirred in  
214 dichloromethane for 20 minutes and filtered; the filter cake was washed with dichloromethane (2  
215 x 20 mL) to afford 3-chloro-5-fluorothieno[3,2-b]thiophene-2-carboxylic acid (**PF-07208254**) as a  
216 white solid. Yield: 10.0 g, 42.2 mmol, 93%.  $^1\text{H}$  NMR (400 MHz, DMSO- $d_6$ )  $\delta$  13.7 (br s, 1H), 7.40

217 (d,  $J = 1.7$  Hz, 1H),  $^{19}\text{F}$  NMR (400 MHz,  $\text{DMSO-}d_6$ )  $\delta$  -116.0 (d, 1H);  $^{13}\text{C}$  NMR (400 MHz,  $\text{DMSO-}$   
218  $d_6$ ):  $\delta$  168.6, 165.64, 161.79, 127.86, 125.20, 122.73, 105.03.; HRMS ( $m/z$ ):  $[\text{M}+\text{H}]^+$  calcd. for  
219  $\text{C}_7\text{H}_3\text{ClFO}_2\text{S}_2^+$ , 236.9242; found, 236.9242; 2.01 min; 100%; HPLC: 4.668 min. (99% pure).

220

221 Synthesis of 2-{2-[6-(2-methylpropoxy)pyridin-3-yl]-1,3-thiazol-4-yl}benzoic acid (**PF-07238025**)

222

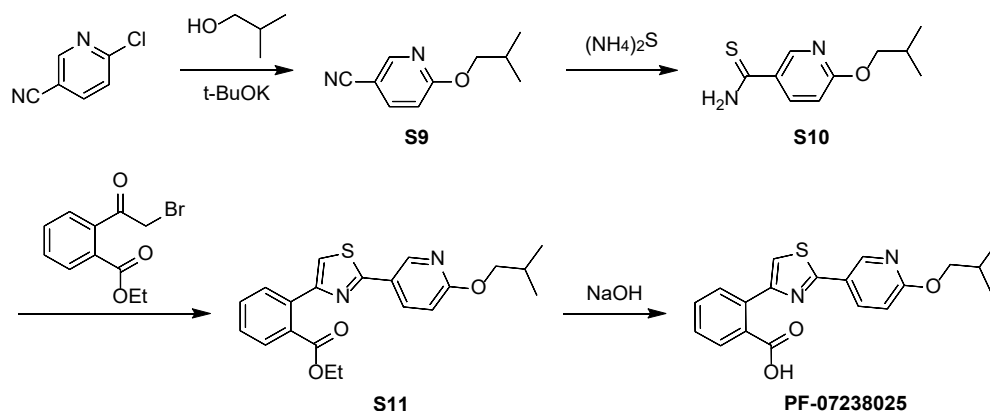

223

224 Step 1. Synthesis of 6-(2-methylpropoxy)pyridine-3-carbonitrile (**S9**)

225 A solution of 2-methylpropan-1-ol (32.1 g, 433 mmol) in tetrahydrofuran (100 mL) was added over  
226 3 minutes to a 0 °C suspension of potassium *tert*-butoxide (48.6 g, 433 mmol) in tetrahydrofuran  
227 (600 mL). After the reaction mixture had been stirred for 15 minutes, a slurry of 6-chloropyridine-  
228 3-carbonitrile (40 g, 290 mmol) in tetrahydrofuran (200 mL) was added in several portions, at a  
229 rate that maintained the reaction temperature below 20 °C. When the reaction mixture had cooled  
230 to 15 °C, the ice bath was removed and the reaction mixture was allowed to stir at room  
231 temperature. After 1 hour, water (700 mL) was added, and the resulting mixture was extracted  
232 with ethyl acetate (2 x 800 mL). The combined organic layers were washed with saturated  
233 aqueous sodium chloride solution, dried over magnesium sulfate, filtered, and concentrated in  
234 vacuo; stirring of the resulting oil caused it to begin to solidify. Heptanes (800 mL) were added,  
235 and the mixture was stirred for 20 minutes, whereupon it was filtered to provide **S9**, and the filtrate  
236 was concentrated in vacuo to provide a pale-yellow oil. Some of this solid **S9** was used to seed  
237 the pale-yellow oil which further solidified upon being subjected to high vacuum to yield in total  
238 45.9 g (260 mmol, 90% yield) of **S9** as a yellow solid.  $^1\text{H}$  NMR (400 MHz,  $\text{DMSO-}d_6$ )  $\delta$  8.68 (dd,  
239  $J = 2.4, 0.8$  Hz, 1H), 8.14 (dd,  $J = 8.7, 2.4$  Hz, 1H), 7.01 (dd,  $J = 8.8, 0.8$  Hz, 1H), 4.12 (d,  $J = 6.7$   
240 Hz, 2H), 2.12 – 1.97 (m, 1H), 0.97 (d,  $J = 6.7$  Hz, 6H);  $^{13}\text{C}$  NMR (101 MHz,  $\text{DMSO-}d_6$ )  $\delta$  165.94,  
241 152.66, 142.48, 117.87, 112.06, 102.18, 73.00, 27.76, 19.34. HRMS ( $m/z$ ):  $[\text{M}+\text{H}]^+$  calcd. for  
242  $\text{C}_{10}\text{H}_{13}\text{N}_2\text{O}^+$ , 177.1022; found, 177.1022; 2.24 min; 99%; HPLC: 8.798 min / 100% pure.

243

244

245 Step 2. Synthesis of 6-(2-methylpropoxy)pyridine-3-carbothioamide (**S10**)

246 This experiment was carried out in two equal batches. Aqueous ammonium sulfide solution (40%,  
247 56 g, 330 mmol) was added to a solution of **S9** (28.8 g, 163 mmol) in methanol (350 mL), and the  
248 reaction mixture was allowed to stir at room temperature overnight. After the two reactions had  
249 been combined, they were concentrated in vacuo to approximately one-half of the original volume,

250 and treated with water (500 mL). The resulting precipitate was collected via filtration, washed with  
251 water and air-dried for 1 hour using house vacuum. The yellow solid was then stirred for 10  
252 minutes in heptane (700 mL), and again collected via filtration. The filter cake was washed with  
253 heptane (2 x 300 mL) to afford **S10** as a solid. Combined yield: 56.36 g, 268.0 mmol, 82%. <sup>1</sup>H  
254 NMR (400 MHz, DMSO-*d*<sub>6</sub>) δ 9.82 (br s, 1H), 9.50 (br s, 1H), 8.71 (d, *J* = 2.6 Hz, 1H), 8.23 (dd,  
255 *J* = 8.8, 2.6 Hz, 1H), 6.90-6.77 (m, 1H), 4.10 (d, *J* = 6.7 Hz, 2H), 2.04 (hept., 1H), 0.97 (d, *J* = 6.7  
256 Hz, 6H). <sup>13</sup>C NMR (101 MHz, DMSO-*d*<sub>6</sub>) δ 197.18, 165.63, 146.65, 139.29, 128.97, 110.03, 72.62,  
257 27.89, 19.47. HRMS (*m/z*): [M+H]<sup>+</sup> calcd. for C<sub>10</sub>H<sub>15</sub>N<sub>2</sub>OS<sup>+</sup>, 211.0900; found, 211.0900; 1.72  
258 min; 98%; HPLC: 7.421 min / 100% pure.

259

### 260 Step 3. Synthesis of ethyl 2-{2-[6-(2-methylpropoxy)pyridin-3-yl]-1,3-thiazol-4-yl}benzoate (**S11**)

261 A mixture of ethyl 2-(bromoacetyl)benzoate (35.2 g, 130 mmol) and **S10** (27.3 g, 130 mmol) in  
262 ethanol (350 mL) was heated to 75 °C for 1.5 hours, whereupon it was allowed to cool to room  
263 temperature and concentrated in vacuo. The resulting oil was subjected to silica gel  
264 chromatography (Eluent: 20% ethyl acetate in heptane); the product was combined with the  
265 product of a similar reaction carried out using **S10** (23.3 g, 111 mmol), and the combined waxy  
266 solids were granulated into a powder. After this had been stirred in heptane (500 mL) for 30  
267 minutes, the solid was collected via filtration, washed with heptane, and resuspended in fresh  
268 heptane (500 mL). This mixture was stirred at room temperature over the weekend, and then  
269 filtered; the filter cake was washed with heptane to provide **S11** as a colorless solid (58.5 g).

270 The impure column fractions were combined and chromatographed on silica gel (Eluent: 20%  
271 ethyl acetate in heptane) to yield additional **S11** as an oil, which solidified to a waxy solid upon  
272 drying at high vacuum. This material was suspended in heptane (40 mL) and the collected solid  
273 was granulated to a powder and again suspended in heptane (60 mL). After the mixture had been  
274 stirred 1 hour, the solid was collected by filtration, washed with heptane (20 mL), suspended in  
275 fresh heptane (60 mL), and stirred at room temperature overnight. Filtration provided a filter cake,  
276 which was washed with heptane (20 mL) to afford additional **S11** as a colorless solid (12.6 g).  
277 Combined yield: 71.1 g, 186 mmol, 77%. <sup>1</sup>H NMR (400 MHz, chloroform-*d*) δ 8.72 (br d, *J* = 2.3  
278 Hz, 1H), 8.19 (dd, *J* = 8.7, 2.5 Hz, 1H), 7.76 (dd, *J* = 7.7, 1.4 Hz, 1H), 7.64 (dd, *J* = 7.7, 1.3 Hz,  
279 1H), 7.53 (ddd, *J* = 7.6, 7.5, 1.4 Hz, 1H), 7.45 (ddd, *J* = 7.5, 7.5, 1.3 Hz, 1H), 7.31 (s, 1H), 6.81  
280 (br d, *J* = 8.7 Hz, 1H), 4.18 (q, *J* = 7.2 Hz, 2H), 4.13 (d, *J* = 6.7 Hz, 2H), 2.19 – 2.04 (m, 1H), 1.09  
281 (t, *J* = 7.2 Hz, 3H), 1.04 (d, *J* = 6.7 Hz, 6H); HPLC: 11.082 min, 97% pure; LC/MS (*m/z*): 383.1  
282 [M+H], 1.090 min.

283

### 284 Step 4. Synthesis of 2-{2-[6-(2-methylpropoxy)pyridin-3-yl]-1,3-thiazol-4-yl}benzoic acid (**PF-** 285 **07238025**)

286 An aqueous solution of sodium hydroxide (3.0 M; 100 mL, 300 mmol) was added to a suspension  
287 of **S11** (58.5 g, 153 mmol) in ethanol (500 mL), and the reaction mixture was heated to 75 °C for  
288 2 hours. After the reaction mixture had cooled, it was diluted with water (500 mL), and acidified to  
289 a pH of approximately 5 to 6 by addition of 1 M hydrochloric acid. The resulting mixture was  
290 allowed to stir for 30 minutes at room temperature, whereupon the precipitate was collected via  
291 filtration and washed with water to afford **PF-07238025** as a colorless solid. Yield: 51.3 g, 145  
292 mmol, 95%. <sup>1</sup>H NMR (400 MHz, DMSO-*d*<sub>6</sub>) δ 12.79 (s, 1H), 8.74 (d, *J* = 2.5 Hz, 1H), 8.21 (dd, *J*  
293 = 8.7, 2.5 Hz, 1H), 7.91 (s, 1H), 7.75 (br d, *J* = 7.7 Hz, 1H), 7.62 (br d, *J* = 7.6 Hz, 1H), 7.57 (ddd,  
294 *J* = 7.6, 7.5, 1.3 Hz, 1H), 7.48 (ddd, *J* = 7.5, 7.5, 1.0 Hz, 1H), 6.97 (d, *J* = 8.7 Hz, 1H), 4.12 (d, *J*  
295 = 6.7 Hz, 2H), 2.14 – 1.99 (m, 1H), 0.99 (d, *J* = 6.7 Hz, 6H). <sup>13</sup>C NMR (101 MHz, DMSO-*d*<sub>6</sub>) δ

296 170.73, 164.99, 163.50, 154.93, 145.43, 137.45, 133.16, 130.76, 129.60, 128.86, 128.65, 123.59,  
297 116.52, 111.62, 72.59, 27.91, 19.51; HRMS (m/z): [M+H]<sup>+</sup> calcd. for C<sub>19</sub>H<sub>19</sub>N<sub>2</sub>O<sub>3</sub>S<sup>+</sup>, 355.1111;  
298 found, 355.1111; 2.39 min; 98%; HPLC: 9.149 min / 100% pure.

299

300 Synthesis of 2-(4-{6-[(1-ethylcyclopropyl)methoxy]pyridin-3-yl}-1,3-thiazol-2-yl)benzoic acid (**PF-**  
301 **07247685**)

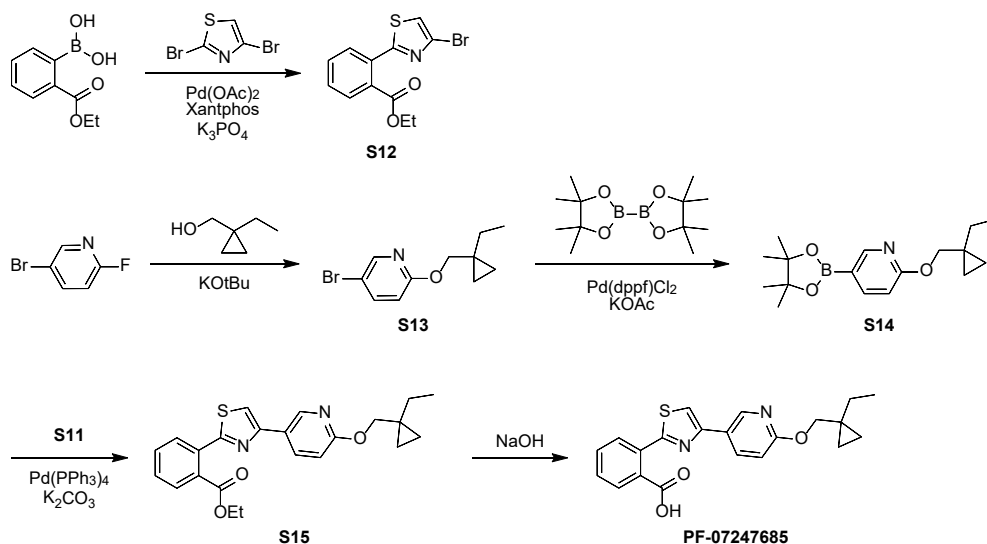

302

303 Step 1. Synthesis of ethyl 2-(4-bromo-1,3-thiazol-2-yl)benzoate (**S12**)

304 A reaction vessel containing a mixture of 2,4-dibromo-1,3-thiazole (10.0 g, 41.2 mmol), [2-  
305 (ethoxycarbonyl)phenyl]boronic acid (8.78 g, 45.3 mmol), palladium(II) acetate (462 mg, 2.06  
306 mmol), 4,5-bis(diphenylphosphino)-9,9-dimethylxanthene (Xantphos; 1.19 g, 2.06 mmol),  
307 potassium phosphate monohydrate (28.4 g, 123 mmol), and tetrahydrofuran (206 mL) was  
308 evacuated and charged with nitrogen; this evacuation cycle was carried out a total of 3 times.  
309 After the reaction mixture had been heated at 70 °C for 3 days, it was cooled and partitioned  
310 between water and ethyl acetate. The aqueous layer was extracted twice with ethyl acetate, and  
311 the combined organic layers were washed with saturated aqueous sodium chloride solution, dried  
312 over sodium sulfate, filtered, and concentrated in vacuo. Silica gel chromatography was carried  
313 out twice: #1 (Eluent: dichloromethane); #2 (Gradient: 0% to 20% ethyl acetate in heptane). The  
314 purified material was triturated in heptane, while it still contained a small amount of ethyl acetate  
315 from concentration of the column fractions; this afforded **S12** as a yellow solid. Yield: 8.67 g,  
316 27.8 mmol, 67%. LCMS 0.89 min / *m/z* 313.9 (bromine isotope pattern observed) [M+H]<sup>+</sup>. <sup>1</sup>H NMR (400  
317 MHz, chloroform-*d*) δ 7.88 – 7.79 (m, 1H), 7.68 – 7.60 (m, 1H), 7.63 – 7.51 (m, 2H), 7.33 (s, 1H),  
318 4.29 (q, *J* = 7.2 Hz, 2H), 1.24 (t, *J* = 7.1 Hz, 3H); <sup>13</sup>C NMR (101 MHz, DMSO-*d*<sub>6</sub>) δ 168.09, 167.16,  
319 132.28, 131.93, 131.25, 131.00, 130.12, 129.65, 124.83, 120.29, 61.53, 14.16; HRMS (m/z):  
320 [M+H]<sup>+</sup>, Br isotopic pattern, calcd. for C<sub>12</sub>H<sub>11</sub>BrNO<sub>2</sub>S<sup>+</sup>, 355.9688; found, 355.9688; 2.26 min;  
321 99%; HPLC: 8.780 min / 97% pure.

322

323 Step 2. Synthesis of 5-bromo-2-[(1-ethylcyclopropyl)methoxy]pyridine (**S13**)

324 Potassium *tert*-butoxide (38.3 g, 341 mmol) was added to a 0 °C solution of (1-  
325 ethylcyclopropyl)methanol (25.0 g, 250 mmol) in tetrahydrofuran (630 mL). The reaction mixture



326 was stirred for 15 minutes, whereupon a solution of 5-bromo-2-fluoropyridine (40.0 g, 227 mmol)  
327 in tetrahydrofuran (60 mL) was added as a single portion. The ice bath was then removed, and  
328 the reaction mixture was allowed to stir for 6 hours. After slow addition of water, the resulting  
329 mixture was extracted three times with ethyl acetate, and the combined organic layers were  
330 washed with saturated aqueous sodium chloride solution, dried over sodium sulfate, filtered, and  
331 concentrated in vacuo. Chromatography on silica gel (Gradient: 0% to 10% ethyl acetate in  
332 heptane) afforded **S13** as a colorless oil. Yield: 56.1 g, 219 mmol, 96%. <sup>1</sup>H NMR (400 MHz,  
333 chloroform-*d*) δ 7.92 (br d, *J* = 2.6 Hz, 1H), 7.40 (dd, *J* = 8.8, 2.6 Hz, 1H), 6.45 (dd, *J* = 8.8 Hz,  
334 1H), 3.86 (s, 2H), 1.25 (q, *J* = 7.4 Hz, 2H), 0.72 (t, *J* = 7.5 Hz, 3H), 0.28 (d, *J* = 2.1 Hz, 2H), 0.26  
335 – 0.16 (m, 2H); <sup>13</sup>C NMR (101 MHz, DMSO-*d*<sub>6</sub>) δ 163.03, 147.51, 141.94, 113.33, 111.60, 71.38,  
336 27.11, 20.83, 11.06, 10.36; HRMS (m/z): [M+H]<sup>+</sup>, Br isotopic pattern, calcd. for C<sub>11</sub>H<sub>15</sub>BrNOS<sup>+</sup>,  
337 256.0332; found, 256.0333; 2.74 min; 96%; HPLC: 10.631 min / 96% pure.

338

339 Step 3. Synthesis of 2-[(1-ethylcyclopropyl)methoxy]-5-(4,4,5,5-tetramethyl-1,3,2-dioxaborolan-2-  
340 yl)pyridine (**S14**)

341 A reaction vessel containing a mixture of **S13** (56.1 g, 219 mmol), 4,4,4',4',5,5,5',5'-octamethyl-  
342 2,2'-bi-1,3,2-dioxaborolane (66.7 g, 263 mmol), [1,1'-  
343 bis(diphenylphosphino)ferrocene]dichloropalladium(II) (16.0 g, 21.9 mmol), and potassium  
344 acetate (KOAc; 64.5 g, 657 mmol) in toluene (706 mL) was evacuated and charged with nitrogen.  
345 This evacuation cycle was repeated twice, whereupon the reaction mixture was heated at 100 °C  
346 overnight. It was then filtered; the filtrate was washed with toluene and concentrated under  
347 reduced pressure, providing **S14** as a black gum. This material was progressed directly to the  
348 following step.

349

350 Step 4. Synthesis of ethyl 2-(4-{6-[(1-ethylcyclopropyl)methoxy]pyridin-3-yl}-1,3-thiazol-2-  
351 yl)benzoate (**S15**)

352 A reaction vessel containing a mixture of **S12** (57.0 g, 183 mmol), **S14** (from the previous step;  
353 ≤219 mmol), potassium carbonate (75.7 g, 548 mmol), and  
354 tetrakis(triphenylphosphine)palladium(0) (21.1 g, 18.3 mmol) in 1,4-dioxane (550.0 mL) and water  
355 (220 mL) was evacuated and charged with nitrogen. This evacuation cycle was repeated twice,  
356 whereupon the reaction mixture was heated to 90 °C for 2 hours. It was then cooled and  
357 partitioned between saturated aqueous sodium bicarbonate solution and ethyl acetate. After the  
358 aqueous layer had been extracted twice with ethyl acetate, the combined organic layers were  
359 washed with saturated aqueous sodium chloride solution, dried over sodium sulfate, filtered, and  
360 concentrated in vacuo. Purification was carried out first using silica gel chromatography (Gradient:  
361 10% to 20% ethyl acetate in heptane), and then via a second chromatography on silica gel  
362 (Eluent: 10% dichloromethane, followed by 20% methanol in dichloromethane) to yield **S15**. Yield:  
363 42.8 g, 105 mmol, 57%. <sup>1</sup>H NMR (400 MHz, chloroform-*d*) δ 8.70 (dd, *J* = 2.5, 0.8 Hz, 1H), 8.14  
364 (dd, *J* = 8.6, 2.5 Hz, 1H), 7.83 – 7.76 (m, 1H), 7.75 – 7.69 (m, 1H), 7.63 – 7.51 (m, 2H), 7.49 (s,  
365 1H), 6.85 (dd, *J* = 8.7, 0.8 Hz, 1H), 4.25 (d, *J* = 7.2 Hz, 1H), 4.21 (d, *J* = 13.1 Hz, 3H), 1.59 (s,  
366 3H), 1.53 (t, *J* = 7.4 Hz, 2H), 1.29 (s, 3H), 1.12 (t, *J* = 7.1 Hz, 3H), 1.00 (t, *J* = 7.4 Hz, 3H), 0.90  
367 (t, *J* = 6.9 Hz, 2H), 0.56 (t, *J* = 3.0 Hz, 2H), 0.49 – 0.42 (m, 2H). LC/MS (1.08 min / calc'd. 408.52,  
368 found 409.3 (M+H)).

369

370 Step 5. Synthesis of 2-(4-{6-[(1-ethylcyclopropyl)methoxy]pyridin-3-yl}-1,3-thiazol-2-yl)benzoic  
371 acid (**PF-07247685**)

372 To a solution of **S15** (42.8 g, 105 mmol) in ethanol (1.1 L) was added an aqueous solution of  
373 sodium hydroxide (4.0 M; 131 mL, 524 mmol). The reaction mixture was heated at 80 °C for 2  
374 hours, whereupon it was concentrated in vacuo to approximately one-half of the original volume  
375 and then added to a mixture of 1 M hydrochloric acid and ethyl acetate. The aqueous layer was  
376 extracted twice with ethyl acetate, and the combined organic layers were washed sequentially  
377 with water and with saturated aqueous sodium chloride solution, dried over sodium sulfate,  
378 filtered, and concentrated under reduced pressure. The residue was dissolved in heptane  
379 containing a small amount of ethyl acetate, and a small quantity of inorganic material was  
380 removed via filtration. The filtrate was diluted with ethyl acetate, washed twice with water and  
381 once with saturated aqueous sodium chloride solution, dried over sodium sulfate, filtered, and  
382 concentrated in vacuo. The residue was dissolved in a small amount of ethyl acetate; upon  
383 swirling of the flask, a solid began to form. heptane was added until the mixture became cloudy,  
384 and swirling was continued while additional material precipitated. When it appeared that solid was  
385 no longer forming, heptane was added, and the mixture was stirred for 2 hours. Filtration, followed  
386 by washing of the filter cake with heptane, provided **PF-07247685** as a white solid. Yield: 34.9 g,  
387 91.7 mmol, 87%. <sup>1</sup>H NMR (400 MHz, DMSO-*d*<sub>6</sub>) δ 13.05 (s, 1H), 8.77 (dd, *J* = 2.5, 0.7 Hz, 1H),  
388 8.25 (dd, *J* = 8.6, 2.5 Hz, 1H), 8.18 (s, 1H), 7.82 – 7.76 (m, 1H), 7.72 – 7.56 (m, 3H), 6.94 (dd, *J*  
389 = 8.6, 0.7 Hz, 1H), 4.17 (s, 2H), 1.46 (q, *J* = 7.4 Hz, 2H), 0.93 (t, *J* = 7.4 Hz, 3H), 0.56 – 0.46 (m,  
390 2H), 0.48 – 0.38 (m, 2H). <sup>13</sup>C NMR (101 MHz, DMSO-*d*<sub>6</sub>) δ 170.13, 166.04, 163.81, 152.54,  
391 145.20, 137.35, 133.84, 131.59, 131.11, 130.40, 129.97, 129.14, 124.17, 115.06, 111.17, 71.11,  
392 27.18, 20.99, 11.16, 10.42.; HRMS (m/z): [M+H]<sup>+</sup> calcd. for C<sub>21</sub>H<sub>21</sub>N<sub>2</sub>O<sub>3</sub>S<sup>+</sup>, 381.1267; found,  
393 381.1267; 2.44 min; 100%; HPLC: 9.024 min / 100% pure.

394  
395  
396  
397  
398

#### **X-ray Crystal Structure Methods:**

399 **Protein Purification and crystallization:** Based on previously published BDK purification  
400 strategies<sup>2,3</sup> an MBP-TEV-humanBDK-His construct was co-expressed with GroEL/ES (pGro7)  
401 in *E. coli* BL21 (DE3) cells. Harvested cells were resuspended in 100 mM potassium phosphate,  
402 1 mM TCEP, 500 mM KCl, 0.1 mM EDTA, 10% glycerol, 1% Tween-20, 0.25% Triton X-100, pH  
403 7.5 supplemented with Roche EDTA-free protease inhibitor tablets and benzonase. After lysis by  
404 Microfluidizer (Microfluidics), cellular debris was pelleted by centrifugation at 40,000 xg. The  
405 supernatant was applied to a 14 mL column of Amylose Resin High Flow (New England Biolabs),  
406 washed with 50 mM HEPES, 1 mM TCEP, 2 mM MgCl<sub>2</sub>, 250 mM KCl, 300 mM arginine, 10%  
407 glycerol, pH 7.5 and eluted with buffer containing 10 mM maltose. Due to phosphorylation of the  
408 protein at the TEV cleavage site, the pooled protein was dephosphorylated with lambda  
409 phosphatase (NEB) while simultaneously removing the MBP by TEV protease. Cleaved,  
410 dephosphorylated BDK was applied to a Superdex 200 column (Cytiva Life Sciences) equilibrated  
411 in 50 mM HEPES, 1 mM TCEP, 2 mM MgCl<sub>2</sub>, 1 M NaCl, 250 mM KCl, 300 mM arginine, 10%  
412 glycerol, pH 7.5. Fractions containing BDK were pooled and concentrated to at least 30 mg/mL.  
413 Crystals of dephosphorylated BDK diffracted poorly. To restore phosphorylation levels closer to  
414 pre-dephosphorylation levels, two cycles of autophosphorylation were performed. For each cycle,  
415 human BDK protein (25 mg/mL) was incubated overnight with 25 mM ATP and 65 mM MgCl<sub>2</sub>,  
416 followed by another round of SEC to remove nucleotide. Autophosphorylation was verified by  
417 mass spectrometry.

418 Phosphorylated human BDK (20 mg/mL) was incubated with 25 mM ADP and 1 mM ligand and  
419 crystals were grown by sitting drop vapor diffusion. For the thiophene PF-07208254, crystals were  
420 grown with a well solution of 0.1 M MES pH 5.4, 0.2 M magnesium chloride, and 10% PEG-3350.  
421 Crystals were cryoprotected by gradually increasing the glycerol concentration to 25% before  
422 flash freezing in liquid nitrogen. For the thiazoles **S3** and PF-07247685, crystals were grown with  
423 a well solution of 0.2 M ammonium sulfate and 17-22% PEG-3350 and cryoprotected with 20%  
424 glycerol.

#### 425 **Data collection, structure determinations and refinements:**

426  
427 Crystal data sets were collected at beamline 17-ID at IMCA CAT (Advanced Photon Source,  
428 Argonne National Laboratory, Chicago). The wavelength used was 1 Å. Crystals were kept at 100  
429 K using cryo stream. Data were processed using the program autoPROC<sup>44</sup>. Compared to the  
430 reported rat BDK complex crystals, our human BDK complex crystals diffracted weaker and  
431 showed strong anisotropical diffractions. Data sets were scaled and merged using anisotropic  
432 resolution cut off, and both spherical and ellipsoidal data completeness were reported.  
433

434 The initial human BDK structure complex with PF-07208254 was determined using published rat  
435 BDK/BT2 complex structure (PDB ID, 4E01). Structure refinements were carried out using the  
436 program Buster<sup>55</sup>. Protein manual building was carried out using program Coot<sup>66</sup> and automatic  
437 ligand fitting was done using the program RhoFit<sup>77</sup>. There is one human BDK/PF-07208254  
438 complex in the crystallographic asymmetric unit, and two human BDK/**S3** and BDK/PF-07247685  
439 complexes in the crystallographic asymmetric unit, respectively. In the latter two crystals, complex  
440 B is significantly more disordered with weaker electron densities for both the protein and ligands.  
441 The percentages of residues in Ramachandran plot favored regions are 96.5%, 95.5%, 95.8%  
442 respectively, and in unfavored regions are 0.32%, 0.32% and 0.16% respectively.  
443

#### 444 **Computational Methods:**

445  
446  
447 **Structure Preparation.** Structure preparation was performed using Protein Preparation Wizard  
448 defaults in Schrodinger 2021-2<sup>8-128-12</sup> unless otherwise stated. X-ray co-crystal structures of rat  
449 BCKDK (rBDK) with BT2, PF-07208254, PF-07238025 and PF-07247685 in the allosteric binding  
450 site and apo were internally generated (2.1 – 2.9 Å resolution) and used as initial coordinates for  
451 MD simulations (human structures were not available at the time). Rat and human BDK protein  
452 sequences are 95.6% identical and the 3-dimensional structures are highly similar between the  
453 two species (RMSD = 0.63 Å over all heavy atoms). Most of the species differences occur in the  
454 N-terminus, which is unresolved in the X-ray crystal structures. There are no residue differences  
455 between rat and human within 9 Å of BT2, PF-07208254, PF-07238025 or PF-07247685;  
456 therefore, it is expected that the conclusions drawn from analysis of MD results based on the rat  
457 structures will translate to human. Two loops were not resolved in the structures. Loop 1 residues  
458 R50 – Q52 (numbering based on the signal peptide processed, mature protein) were built using  
459 Prime<sup>12-1412-14</sup>. The ATP lid (loop 12, residues A306 – G335) was not modeled due to its size and  
460 was capped at residues T305 and F336. ADP, two crystallographic ions, Mg<sup>2+</sup> and K<sup>+</sup>, and one  
461 crystallographic water molecule that forms a hydrogen bond network between ADP, D285  
462 sidechain and G289 backbone were present in the ATP binding site for all simulations. Consistent  
463 zero-order bonds to Mg<sup>2+</sup> and K<sup>+</sup> were employed. Two additional crystallographic waters were  
464 retained in the structures of PF-07238025 and PF-07247685, one of which forms a hydrogen  
465 bond network from the carboxylic acid of the ligand to the L164 backbone, Y346 sidechain, and  
466 water #2, and the other of which forms a hydrogen bond network to the thiazole N of the ligand,

467 the R171 sidechain, and water #1. Protonation states were optimized using PROPKA at pH 7.0  
468 and checked for consistency across all systems.

469 **System Preparation, MD Simulations, Analysis.** Desmond System Builder in Schrodinger  
470 2021-2<sup>15-1715-17</sup> was used to prepare the systems for simulation. The OPLS4 force field<sup>1818</sup> was  
471 used following customization using the Force Field Builder panel for missing ligand torsion  
472 parameters along with the TIP3P water model<sup>1919</sup>. An orthorhombic periodic box was set up with  
473 12 Å of water on all sides of the system and neutralizing ions added. Default Desmond  
474 minimization and equilibration protocols were employed. Recent work has suggested that analysis  
475 of multiple MD replicas leads to more reliable conclusions than those drawn based on a single  
476 long simulation<sup>2020-23</sup>; therefore following equilibration, six independent NPT production  
477 simulations of 100 ns each were run for all five systems using Desmond, starting with the same  
478 equilibrated structure and using new initial randomized velocities. The independent trajectories  
479 were combined for subsequent analysis, giving a total production time of 600 ns for each system.  
480 Schrodinger 2021-2 software was used to perform RMSD, RMSF, essential dynamics, CM, and  
481 hydrogen bond analyses. BDK lipoyl-binding pocket residues were identified based on overlay  
482 with the asymmetric PDK3-L2 complex (PDB ID: 1Y8P)<sup>2124</sup> and selection of residues within 6 Å of  
483 the L2 group.

484

485

#### 486 **Supporting computational details and analysis.**

487 All MD trajectories stabilized by 50 ns based on the backbone root-mean-square deviation  
488 (RMSD) from the initial structures (Supplementary Figure 9A). The dynamics of loop 1 and the  
489 lipoyl-binding pocket residues upon inhibitor binding seem to play a role in destabilization or  
490 stabilization of BDK on the BCKDH complex as described in the main text. As detailed in Tso et  
491 al.<sup>2325</sup> there is a network of interactions connecting helices  $\alpha 4$  and  $\alpha 5$  to the lipoyl-binding pocket,  
492 and the inhibitor (S)-CPP perturbs the lipoyl-binding pocket residues. In support of this, the MD  
493 simulations suggest there is an overall increase in dynamic flexibility of the BDK lipoyl-binding  
494 pocket when bound to destabilizers BT2 and PF-07208254, and an overall decrease in dynamic  
495 flexibility of the lipoyl-binding pocket when bound to stabilizers PF-07238025 and PF-07247685.  
496 This observation can be explained by an increase in the overall number of hydrogen bonds formed  
497 over the course of the MD simulations when BDK is bound to stabilizers PF-07238025 and PF-  
498 07247685, 73 and 298 on average for the lipoyl-binding pocket and overall, respectively,  
499 compared to when BDK is bound to destabilizers BT2 and PF-07208254, 71 and 295 on average  
500 (Supplementary Figure 10C-D).

501

502 The width of the active-site cleft seems to play an important role in the ability of BDK to  
503 phosphorylate E1 as described in the main text. When destabilizers BT2 or PF-07208254 are  
504 bound to BDK, the width of the active-site cleft is narrowed as measured by CM <sub>$\alpha 5-\alpha 8$</sub> , preventing  
505 E1 from positioning itself for phosphorylation (Supplementary Figure 10A-B). In the apo structure,  
506 Y99, L129, H132, R167, and R171 form an intricate hydrogen bond (HB) network: Y99 forms a  
507 HB with R167 via sidechain interactions, R167 sidechain forms a HB with the H132 backbone,  
508 and R171 sidechain forms a HB with the backbone of L129 (Supplementary Figure 10E-F). Upon  
509 binding of a destabilizer, BT2 or PF-07208254, this HB network is rearranged, as previously  
510 described by Tso et al.<sup>25, 26</sup> The acid moiety of the inhibitor binds in between Y99 and R167,  
511 forming HB interactions with the sidechains and forcing the R167 sidechain toward the active-site  
512 cleft. The HB between the R167 sidechain and H132 backbone is maintained, which pulls the  
513 loop in between helices  $\alpha 4$  and  $\alpha 5$  toward the active-site cleft, and places the H132 sidechain into  
514 position to interact with the acid moiety of the inhibitor (Supplementary Figure 10E). The

515 importance of H132 was previously shown in the study of a p.His162Gln variant by Maguolo et  
516 al.,<sup>2527</sup> and the current results further highlight the importance of this residue and its interactions.  
517 The R171 sidechain maintains its HB with the L129 backbone and forms an additional HB  
518 interaction with the acid of the ligand. These changes in interactions induced by ligand binding  
519 cause a subtle movement in the positions of helix  $\alpha 5$  and  $\alpha 3$ , leading to a narrowing of the active-  
520 site cleft.

521  
522 In contrast, when stabilizers PF-07238025 or PF-07247685 are bound to BDK, the active-  
523 site cleft widens as measured by  $CM_{\alpha 5-\alpha 8}$ . Upon binding of a stabilizer, PF-07238025 or PF-  
524 07247685, the R167 sidechain flips in order to make 2 HBs to the acid moiety of the inhibitor  
525 (Supplementary Figure 10F). This causes H132 to adjust to maintain the HBs between its  
526 backbone and the R167 sidechain, pulling the loop between helices  $\alpha 4$  and  $\alpha 5$  away from the  
527 active-site cleft. A HB can still be maintained between Y99 and R167 sidechains with the inhibitor  
528 bound as in the apo structure. The sidechain of R171 is forced to change conformation upon  
529 binding of a stabilizer and forms a HB with the sidechain of Y346 in addition to participating in a  
530 water-mediated HB network with the acid and thiazole nitrogen of the inhibitor. The terminal  
531 phenyl of the inhibitor, which is positioned in the active-site cleft and blocks E1 from binding,  
532 interacts with Y241 through van der Waals (VDW) interactions and pushes the sidechain slightly  
533 away, causing the cleft to widen further.

534

535 **Western Blot antibodies:** The following antibodies and concentrations were used for Western  
536 blotting. pBCKDH phospho S292 (Bethyl A304-672A 1:1000), total BCKDH (Yenzym 037 1:1000),  
537 BDK (abcam ab128935 1:1000), GAPDH (CST 14C10 1:10000),  $\alpha$ -tubulin (CST 2144 1:10,000).  
538 Secondary antibodies were anti-rabbit IgG HRP-Conjugated-(CST 7074P2 1:10000) Anti-mouse  
539 IgG (CST HRP-linked Antibody #7076).

540 **In vivo compound measurements:** Compounds were quantitatively measured in plasma and  
541 tissue samples using liquid chromatography–tandem mass spectrometry (LC-MS/MS). All  
542 standards were made in blank mouse plasma and were typically prepared at 1-50,000 ng/mL.  
543 Tissues were homogenized using a 1:4 dilution in 60:40 isopropanol:water and 2 hours of shaking  
544 in the bead beater using zirconia beads. For tissue analysis, a mixed matrix approach was used  
545 where an equal volume of blank tissue homogenate was added to plasma standards, and blank  
546 plasma was added to tissue samples. Samples were prepared by protein precipitation using  
547 acetonitrile containing 150 ng/mL indomethacin, 25 ng/mL diclofenac and 5 ng/mL tolbutamide  
548 as internal standards, vortexed and centrifuged, then transferred and diluted with water for LC-  
549 MS/MS analysis. Chromatography was performed on a Waters Acquity iClass UPLC System  
550 (Milford, MA). Separation was achieved with an Acquity UPLC HSS T3 column (2.1x50 mm, 1.8  
551  $\mu$ m), and a gradient of 0.1% formic acid in water (Mobile Phase A) and 0.1% formic acid in  
552 acetonitrile (Mobile Phase B) at a flow rate of 0.600 mL/min. The gradient increased from 5%B to  
553 95%B over 2.0 minutes and the entire run time was 3 minutes. Data was collected on an AB Sciex  
554 API6500 mass spectrometer (Foster City, CA, USA) using Turbo IonSpray™ electrospray  
555 ionization (ESI) and multiple reaction monitoring (MRM) mode. Typical source conditions (heated  
556 capillary temperature, gas1, gas2, and curtain gas) were set at 500C, 40, 60 and 20, respectively.  
557 Data acquisition and quantitative processing was carried out with Analyst software version 1.6.2  
558 (Applied Biosystems/MDS Sciex, Canada).

559 MRM transitions were optimized for each compound. BT2 (Negative Ion Mode): Q1 245.0; Q3  
560 201.0; DP -60; CE -15; IS=Diclofenac. PF-07208254 (Negative Ion Mode): Q1 235.0; Q3 191.0;  
561 DP -65; CE -18; IS=Tolbutamide. PF-07238025 (Positive Ion Mode): Q1 355.1; Q3 281.1; DP 60;  
562 CE 34; IS=Indomethacin. PF-07247685 (Positive Ion Mode): Q1 381.2; Q3 281.1; DP 80; CE 45;  
563 IS=Indomethacin. IS Transitions: Diclofenac (Negative Ion Mode): Q1 294.1; Q3 250.0; DP -40;  
564 CE -15. Tolbutamide (Negative Ion Mode): Q1 269.0; Q3 170.0; DP -60; CE -30. Indomethacin  
565 (Positive Ion Mode): Q1 358.3; Q3 139.2; DP 46; CE 26.

566 **Plasma BCAA/BCKA quantification:** Plasma BCAA and BCKA were analyzed using a  
567 standardized method at Pfizer or at Q<sup>2</sup> solutions, Ithaca, NY. Two methods were used for  
568 BCAA/BCKA quantitation. *Pfizer (Groton, CT):* A surrogate analyte approach was utilized with  
569 <sup>13</sup>C<sub>5</sub> D<sub>8</sub><sup>15</sup>N valine, D<sub>10</sub> leucine, <sup>13</sup>C<sub>6</sub> D<sub>10</sub><sup>15</sup>N isoleucine, <sup>13</sup>C<sub>4</sub> D<sub>4</sub> ketovaline, D<sub>7</sub> ketoleucine and  
570 <sup>13</sup>C<sub>6</sub> ketoisoleucine as surrogate analytes and <sup>13</sup>C<sub>5</sub> valine, D<sub>7</sub> leucine, <sup>13</sup>C<sub>6</sub> isoleucine, <sup>13</sup>C<sub>5</sub>  
571 ketovaline and D<sub>3</sub> ketoleucine as internal standards (ketoleucine and ketoisoleucine shared the  
572 same IS). Surrogate standard curves were typically prepared at 10 – 50,000 ng/mL in control  
573 mouse plasma. Samples and standards were subjected to protein precipitation with methanol  
574 containing internal standards, vortexed and centrifuged to obtain supernatant. An aliquot of the  
575 supernatant was transferred to a new 96-well block, dried down under nitrogen, and reconstituted  
576 in water containing 0.1% acetic acid for injection. Chromatography was performed on a Shimadzu  
577 Nexera UPLC System (Kyoto, Japan). Separation of structural isomers was achieved with an  
578 Acquity UPLC HSS T3 column (2.1x100 mm, 1.8 μm, Waters Corporation, Milford MA) using 0.1%  
579 acetic acid in water (Mobile Phase A) and methanol (Mobile Phase B) at a flow rate of 0.400  
580 mL/min. The gradient increased from 3%B to 85%B over 6.1 minutes and the entire run time was  
581 10 minutes. Data was collected on an AB Sciex Triple TOF 6600 mass spectrometer (Foster City,  
582 CA, USA) using negative ion electrospray ionization (ESI) and TOF MS with a mass range of 60-  
583 1060. Extracted ion chromatograms were integrated at a mass tolerance of 10 ppm. Surrogate  
584 standard calibration curves were obtained by fitting the normalized intensities of the surrogate  
585 standards vs. their concentrations using a linear fit with 1/x<sup>2</sup> weighting factor. The endogenous  
586 concentrations were obtained by converting normalized intensities to concentrations according to  
587 the corresponding surrogate standard curve fitting equations. Data acquisition was performed  
588 with Analyst software version 1.6.2, peak integrations were performed in MultiQuant and either  
589 Multiquant or Watson LIMS 7.5 was used for regression and quantitation.

590 **Tissue BCAA/BCKA quantitation:** Mouse muscle tissue BCAA/BCKA were analyzed using a  
591 standardized method at Q<sup>2</sup> solutions, Ithaca, NY. Briefly, mouse muscle tissue was pounded to  
592 powder under liquid N<sub>2</sub> and homogenized and sonicated in working internal standard solution  
593 (WISS) containing Leucine D<sub>10</sub>, Isoleucine D<sub>10</sub>, Valine D<sub>8</sub>, Ketoleucine D<sub>3</sub>, Ketoisoleucine D<sub>8</sub>,  
594 Ketovaline <sup>13</sup>C<sub>4</sub> D<sub>4</sub> in 4:1 methanol/water at a ratio of 50 mg tissue/1 mL WISS. Samples were  
595 spun, and the supernatant was collected and transferred to a deep well injection plate followed  
596 by drying under nitrogen at 40 °C. Residue was resuspended in 50 μL water containing 0.2%  
597 acetic acid. Samples were run on a Dionex Ultimate 3000 with a Waters HSS T3 1.8 μm, 2.1 x  
598 100 mm column. The mobile phase was A:1000:2 water/acetic acid and B: methanol. Gradient  
599 separation began at 1.8% B for 2 minutes then increased to 5.5% B over 0.5 minutes, then to  
600 6.5% B over 2.75 minutes, then to 100% B over 1.75 minutes and held for 1 minute followed by  
601 a return to 1.8%B and held for 1 minute. Data was acquired on a Thermo Q-Exactive mass  
602 spectrometer within a scan range of 100 – 160 m/z. A surrogate analyte approach was utilized for  
603 quantitation with <sup>13</sup>C<sub>5</sub><sup>15</sup>N valine, <sup>13</sup>C<sub>6</sub> leucine, <sup>13</sup>C<sub>6</sub> isoleucine, <sup>13</sup>C<sub>5</sub> ketovaline, <sup>13</sup>C<sub>6</sub> ketoleucine  
604 and <sup>13</sup>C<sub>6</sub> ketoisoleucine as surrogate analytes. Surrogate standard curves were typically prepared  
605 at 25 – 4000 nM for amino acids and 0.8 – 64 nM for keto acids in pooled mouse tissue extract.  
606 The mono-isotopic mass was monitored for all analytes and standards except for leucine,  
607 isoleucine and valine, for which the M+1 isotopologue was measured and a correction factor

608 based on the natural isotope abundance was applied. Surrogate standard calibration curves were  
609 obtained by fitting the normalized intensities of the surrogate standards vs. their concentrations  
610 using a linear fit. The endogenous concentrations were obtained by converting normalized  
611 intensities to concentrations according to the corresponding surrogate standard curve fitting  
612 equations.

613 **Transverse Aortic Constriction:** Two rounds of equivalent surgeries were performed. The  
614 afternoon prior to surgery a subcutaneous dose of SR Meloxicam was administered to ensure  
615 adequate pre-operative analgesia coverage. Meloxicam was slowly released over 72 hours. All  
616 surgical instruments were sterilized with vaporized hydrogen peroxide. The surgeon and all  
617 surgical personnel donned a bonnet, masks, gowns, and gloves. Instruments were sterilized  
618 between each animal using a hot bead sterilizer and sterile tip technique. On the day of surgery,  
619 anesthesia was induced by administering an anesthetic cocktail IP (Ketamine 25 mg/mL @ 100  
620 mg/kg + xylazine 2 mg/mL @ 8 mg/kg). Once at an acceptable plane of anesthesia, the animal  
621 was prepped for surgery. A pre-operative dose of LRS was administered subcutaneously at 20  
622 mL/kg. Nails were clipped, and fur was shaved from the chin to the xyphoid process. The skin  
623 was prepped with 2 consecutive scrubs of Chloraprep swabs. The animal was intubated using  
624 polyethylene 60 tubing and placed on a ventilator. End tidal volume was set at 250  $\mu$ L/min, and  
625 the respiration was set at 140 breaths per minute. A final scrub with a Chloraprep swab was  
626 applied. Isoflurane was administered at rate of 0.5 to 2% throughout the procedure.

627 A toe pinch was performed to ensure an adequate plane of anesthesia for surgery. A midline skin  
628 incision was made above the 1<sup>st</sup> and 2<sup>nd</sup> rib, approximately 0.5-1 cm in length. A local analgesic  
629 block (Bupivacaine @ 1 mg/kg + Buprenorphine @ 0.003 mg/kg) was administered to the  
630 intercostal muscles along the 1<sup>st</sup> and 2<sup>nd</sup> ribs. Using blunt dissection, a 3 mm muscle incision  
631 was made between the 1<sup>st</sup> and 2<sup>nd</sup> rib. The thymus was gently manipulated and placed on either  
632 side of the incision to expose the aortic arch beneath. A retractor was placed on each side of the  
633 incision to secure the thymus and create a clear surgical window of the aortic arch. The tissue of  
634 the aortic arch was gently isolated, between the brachiocephalic artery and the left common  
635 artery. A 6-0 Silk suture was passed under the aortic arch, and a 4 mm stainless steel pin (0.38  
636 mm diameter) was placed across the aorta. The suture was tied around the needle and secured  
637 using a surgeon's knot. Immediately, the stainless steel pin was removed from under the suture  
638 and the suture remained in place to produce a defined constriction of the vessel. For sham  
639 surgery, the aortic arch was isolated, and a suture was passed under the aortic arch, no ligation  
640 was made, and the suture was removed. The retractor was carefully removed, and the ribs were  
641 closed with 2 simple interrupted sutures using 6-0 Prolene. To prevent atelectasis, before  
642 completely closing the muscle incision, positive pressure was applied to the exhaust tubing of the  
643 ventilator to assist in evacuating any excess air from the chest cavity. A small amount of saline  
644 was applied to the muscle tissue, and the skin was closed with 5-0 Prolene using 2 single external  
645 horizontal mattress pattern sutures. The mouse was slowly weaned off the ventilator. An  
646 intraperitoneal dose of Antisedan (0.5 mg/mL @ 1 mg/kg) was administered to reverse the effects  
647 of xylazine. When the animal was removed from the ventilator, they were placed in a warm oxygen  
648 chamber until they were ambulatory. Once ambulatory the mice were returned to a clean warm  
649 cage and a subcutaneous dose of diluted buprenorphine was administered. During day 0 PM  
650 post-operative assessments, a subcutaneous dose of LRS (20 mL/kg) and diluted buprenorphine  
651 was administered. Another dose of subcutaneous LRS and diluted buprenorphine was  
652 administered during day 1 AM post-operative assessments. During day 1 PM post-operative  
653 assessments through day 2 PM assessments, diluted buprenorphine was administered  
654 subcutaneously. Animals were given Nutra Gel support for 4 days post surgery. After the 72-hour  
655 post-op period animals were monitored daily until post-op day 7. Food consumption was  
656 monitored throughout the study to ensure similar food consumption across groups. Three animals

657 that did not consume at least 1.5 g/day compound chow for 3 consecutive days and consequently  
658 had very low plasma levels of PF-07208254 for a sustained time period were excluded from the  
659 study. Animals that lost 20% of body weight or greater from the start of surgery were humanely  
660 euthanized. At euthanasia, hearts were excised, excess blood within the chamber was drained,  
661 hearts were weighed, the atria were removed, and the ventricles were immediately snap frozen  
662 in liquid nitrogen. Lungs were blotted briefly on a napkin and weighed.

663  
664 **Echocardiography:** Ultrasounds were acquired in a blinded fashion at 4 weeks post-surgery on  
665 the Vevo3100 using the MX550D probe. Prior to the imaging studies, animals were anesthetized  
666 with 2% isoflurane in an induction chamber. Once asleep, animals were placed onto a heated  
667 platform set to 34 °C to maintain body temperature. Heart rates were monitored and maintained  
668 above 400 bpm for all measurements. Electrode gel was applied to the four paws and taped to  
669 the ECG electrodes on the heated platform. Hair was removed from the chest with Nair, and  
670 isoflurane was set to 0.5-1.0% for systolic function acquisition. Warm echo gel was placed on the  
671 shaved chest, and the MX550D probe was used for recordings. For recording of the pasternal  
672 long axis (LV long axis view), the “notch” of the MX550D transducer was placed towards the head  
673 of the animal and rotated approximately 30-45 degrees clockwise. When heart structures were  
674 visualized clearly, a B-mode image of the heart was recorded. The MX550D probe was turned 90  
675 degrees clockwise to the left side of the mouse to obtain a pasternal short axis view (LV short  
676 axis view). Once the ventricular structures were clear, the M-mode cursor was set in the middle  
677 of the ventricle and an M-mode image of the ventricle was recorded. After scanning was finished,  
678 residual echo gel was removed, and the mouse was returned to the cage for recovery.  
679 Echocardiography images were analyzed using Vevo Lab 3.20 software. At least three beats were  
680 measured, and the mean was calculated. Images were analyzed blindly after acquisition.

681 **Hek293 Cell experiments:** Human embryonic kidney (HEK293) cells were purchased from  
682 American Type Culture Collection (ATCC) (CRL-1573™) and were cultured at 37 °C in Eagle’s  
683 Minimal Essential Medium (EMEM) supplemented with 10% Hi-FBS (Gibco) and 100 units/mL  
684 Penicillin/Streptomycin (ThermoFisher Scientific). BT2 (100 and 300 µM), PF-07208254 (3, 10, 30  
685 or 300 µM), PF-07238025 (0.2, 0.6, 2 or 6 µM), PF-07247685 (0.01, 0.03, 0.1 or 0.3 µM) or DMSO  
686 (0.01%) was added to HEK293 cells and incubated for 48 hours at 37 °C. Whole cell lysates were  
687 lysed in 200 µL of Cell Signaling lysis buffer containing HALT protease inhibitors (ThermoFisher  
688 Scientific) 48 hours post-treatment. Cells were lysed by sonication. Samples were then spun at  
689 16,260 x g for 10 minutes, and the supernatant was placed in new tubes. Total protein  
690 quantification was calculated using Pierce BCA assay. All samples were boiled at 95 °C for 5  
691 minutes with Invitrogen LDS buffer and Reducing Agent at a concentration of 2 mg/mL of total  
692 protein based on the BCA assay results. 20 µg of each sample was loaded into NuPage 4-12%  
693 Bis-Tris gels and samples were run at 160V for 2 hours using the BioRad system. The proteins  
694 were then transferred to a PVDF membrane using the iBlot2 system. Membranes were blocked  
695 in 5% milk in TBS plus 0.05% Tween 20. The membranes were exposed using the Amersham  
696 800 imager, and Imagequant software and Microsoft Excel 365 was used to analyze densitometry  
697 of each band. Primary antibodies used are detailed above.

698

699 **In vitro BDK FRET activity assay:** Initially, 5 µL of 2X BDK enzyme (5 nM final) in assay buffer  
700 (20 mM Tris·HCl (pH 7.5), 100 mM KCl, 5 mM MgCl<sub>2</sub>, 0.5 mM DTT, 0.02% (vol/vol) Tween-20,  
701 and 0.01% BSA) was added to the compound plates and pre-incubated for 15 min at room  
702 temperature. Final enzyme concentration was optimized to reflect the linear range of enzyme  
703 activity with less than 30% substrate conversion. This was followed by addition of 5 µL of 2X LBD-  
704 Tev-PhosphoPep+Lipoyl substrate/ATP mix in assay buffer to initiate the reaction. Plates were



705 covered with a lid and allowed to incubate at room temperature for 90 min. Final concentration of  
706 LBD-E1 substrate was 50 nM and final concentration of ATP was 15  $\mu$ M. Following incubation,  
707 the enzyme reactions were stopped by adding 5  $\mu$ L of 4X stop/primary antibody solution  
708 containing 100 mM (final) EDTA, 2 nM (final) anti-His Eu antibody, and 1:1000 anti-pE1 antibody  
709 in assay buffer. The plates were covered and incubated at room temperature for 30 min. Finally,  
710 5  $\mu$ L of 4X detection reagent consisting of 20 nM (final) anti-rabbit Ulight antibody and 1X LANCE  
711 detection buffer in dH<sub>2</sub>O was then added. The plates were centrifuged for 30 seconds at 113 x g.  
712 After a 60 min incubation, the plates were read on an EnVision® MultiReader in TR-FRET mode  
713 (excitation 320 nm: emissions 665 nm). The raw data from the EnVision® MultiReader was  
714 expressed as a ratio and was analyzed using proprietary software (Activity Base). The percent  
715 effect at each concentration of compound was calculated relative to the values for the uninhibited  
716 control wells (100% DMSO) and fully inhibited control wells (600  $\mu$ M radicicol) on each assay  
717 plate. IC<sub>50</sub> values were determined from the percent effect data using a 4-parameter logistic dose  
718 response model (Activity Base).

719  
720 **Human skeletal muscle BDK activity assay:** BDK activity and inhibition in human skeletal  
721 muscle cells was monitored by measuring BDK dependent phosphorylation of endogenous  
722 BCKDHA using a custom AlphaLISA SureFire Ultra assay system. Prior to the assay, the total  
723 BCKDHA antibody (Bethyl Laboratories - A303-790A) was biotinylated using the ChromaLink™  
724 One-Shot Antibody Biotinylation Kit (Trilink Technologies B-9007-009K) and a phospho (S293)  
725 BCKDHA antibody (Bethyl Laboratories A304-672A) was CaptSure tagged using the Lightning-  
726 Link® CaptSure™ Conjugation Kit (TGR BioSciences 6300007). Human skeletal myocytes  
727 (Gibco A11440) were previously immortalized via the introduction of hTERT into the cells.  
728 Immortalized human skeletal muscle cells were plated at 15,000 cells/well and grown in skeletal  
729 muscle growth media containing the media supplement and chick embryo extract (Promocell C-  
730 23060 and C-23160, MP92850145) in 384-well CulturPlate plates. After overnight incubation,  
731 media was removed, and compound treatments were performed in growth media diluted 10X in  
732 PBS for 60 minutes. Cells were washed with PBS and lysed in 1X lysis buffer (Cell Signaling  
733 9803) containing 2 nM biotinylated total BCKDHA Antibody and 1X protease/phosphatase  
734 inhibitor cocktail (Cell Signaling 5872). After an hour incubation at room temperature, a 1X  
735 immunoassay buffer (Perkin Elmer AL000F) mix containing 1:400 CaptSure tagged Phospho  
736 BCKDHA Antibody and 40  $\mu$ g/ $\mu$ L Anti CaptSure acceptor beads (Perkin Elmer ALSU-ACAB) was  
737 added to the lysates and allowed to incubate for 60 minutes. The signal was then generated by  
738 the addition of streptavidin donor beads (Perkin Elmer ALSU-ASDB) at 40  $\mu$ g/ $\mu$ L in 1X  
739 immunoassay buffer and incubating at room temperature for an additional 30 minutes. The  
740 phospho BCKDHA signal was developed using EnVision® multilabel reader (Perkin Elmer) using  
741 Alphascreen settings (excitation 680 nm, emission 570 nm). The fluorescence emission was used  
742 to calculate the % effect relative to the HPE (30  $\mu$ M BT2) and ZPE (DMSO). IC<sub>50</sub> curves were  
743 generated using ActivityBase software.

744 **RNA Isolation:** Frozen tissues were placed in Matrix D Lysis Tubes (2 mL) and homogenized in  
745 1 mL of Qiazol and 200  $\mu$ L of chloroform (Sigma). Samples were then spun for 10 min at 11,292  
746 x g for phase separation, and the upper aqueous phase of each sample was mixed in a 1:1 ratio  
747 with 70% ethanol. The samples were then washed in Qiagen RNEasy spin columns and reagents  
748 according to the manufacturer's protocol. Total RNA was quantified using NanoDrop. qPCR was  
749 performed using the RNA to CT one step kit (Invitrogen) according to manufacturer's instructions  
750 and the Taqman Probes (Fisher) used are listed in Supplementary Table 5.

#### 751 **Supplementary Table 5. RT-PCR Probes**

| Gene | Catalog ID |
|------|------------|
|------|------------|

|        |               |
|--------|---------------|
| Tnfa   | Mm00443258_m1 |
| Ccl2   | Mm00441242_m1 |
| Cd68   | Mm03047343_m1 |
| Ccr2   | Mm99999051_gH |
| Col1a1 | Mm00801666_g1 |
| Col1a2 | Mm00483888_m1 |
| Bckdk  | Mm00437777_m1 |
| Ppia   | Mm02342430_g1 |
| Hprt   | Mm03024075_m1 |
| Gapdh  | Mm99999915_g1 |
| Itgam  | Mm00434455_m1 |
| Bckdha | Mm00476112_m1 |
| Bckdhb | Mm01177077_m1 |
| Bcat1  | Mm00500289_m1 |
| Bcat2  | Mm00802192_m1 |
| Dbt    | Mm00501651_m1 |

752

753

754 **Plasma analysis and ELISA:** Whole blood samples were collected in K<sub>2</sub> EDTA tubes and placed  
755 on ice. Samples were then spun in a microcentrifuge at 4 °C for 10 min at 11,292 x g. Plasma  
756 was aliquoted into separate tubes, and ALPCO Ultrasensitive Insulin ELISA (80-INSMSU-E01,  
757 E10) was utilized according to manufacturers' instructions.

758 **Liver triglyceride assessment:** Frozen livers were pulverized on a cooled aluminum block in  
759 liquid nitrogen. Approximately 50 mg of pulverized tissue was added to a pre-weighed 2 mL lysing  
760 matrix D tube. After the tissue was added, these tubes were weighed again to determine the exact  
761 weight of the tissues. 1 mL of homogenization buffer, containing 10 mM TRIS pH 7.4, 0.9% NaCl  
762 and 0.2% Triton X100, was added to each sample. Samples were immediately homogenized using  
763 MP FastPrep 5G with the following parameters: (speed: 6, time: 40 seconds, cycles: 1). The  
764 samples were then vortexed for 20 seconds. and then transferred to 1.1 mL tubes and  
765 immediately analyzed on a Siemens Chemistry XPT clinical analyzer using Triglycerides\_2  
766 reagents.

767 **Histopathology Evaluation:** The left lateral lobe of the liver was fixed in 10% formalin, embedded  
768 in paraffin, and sectioned; 5 mm sections were mounted to positively charged slides for H&E  
769 staining. A board-certified veterinary pathologist who was familiar with the animal models graded  
770 H&E sections for hepatic lipid vacuolation (steatosis) and inflammation (inflammatory cell  
771 infiltrates) in a blinded fashion on a scale of 0-4.

772 **Interaction proteome:**

773 **Lysis and digestion.** Mouse hearts were lysed from mice that were treated with vehicle, 10 mg/kg  
774 PF-07247685 BID (described in Extended data Fig. 5), or 100 mg/kg BT2 QD for 18 days. BDK  
775 was immunoprecipitated from 5 mg of heart lysate with 15 µL BDK antibody (N=3/group) or 5 µL  
776 IgG (N=3 total). Immunoprecipitates were performed overnight, protein A magnetic beads were  
777 added, and Ips were washed 3x using lysis buffer. The beads were subsequently washed 3  
778 additional times in PBS and resuspended in denaturing buffer (8 M urea and 0.1 M Tris, pH 8.5).

779 The proteins were reduced with dithiothreitol (DTT) 1 mM final concentration for 30 min at 55 °C  
780 and alkylated with iodoacetamide (55 mM final concentration) for 30 min at RT in the dark. Lys-C  
781 protease (Wako Chemicals, Richmond, VA, USA) was added at a ratio 1:100 to the total protein  
782 amount and incubated at room temperature for 2 h in a Thermomixer. Urea was diluted to 2 M  
783 with 50 mM Tris pH 8.5, and the samples were incubated with trypsin (1:50 w/w) (Pierce  
784 Biotechnology, USA) overnight at 37 °C at 41 x g.

785 **Elution and desalting of peptides.** The peptide mixtures were acidified with formic acid (FA) to  
786 1% final concentration (pH <3) and centrifuged at 4000 x g for 5 min. Peptides were desalted in  
787 2-plug C18 (Empore C18 extraction disks). The stage tips were sequentially conditioned with  
788 methanol (MeOH), 100% acetonitrile (ACN), 50% (vol/vol) ACN / 0.1% (vol/vol) FA, and 0.1%  
789 (vol/vol) FA. The samples were loaded onto the stage tips and centrifuged at 3000–3500 x g for  
790 3 min at room temperature. After sample loading, the tips were washed twice with 0.1% FA.  
791 Peptides were eluted with 50% ACN/0.1% FA. The eluted peptides were dried in a Speed-Vac  
792 centrifuge, reconstituted in 5% ACN, 0.1% FA (vol/vol) and sonicated in a water bath sonicator  
793 for 5 min.

794 **MS analyses.** The peptides were loaded on a 50 cm column (Thermo Fisher ES903) and  
795 separated by reversed-phase chromatography using a gradient from 5% to 30% B over 2 h (Buffer  
796 A: 0.1% FA in HPLC grade water; Buffer B: 80% ACN, 0.1% FA) with a flow rate of 0.25 µL/min  
797 using an EASY-nLC 1200 system (Thermo Fisher Scientific). For interaction proteome MS data  
798 were acquired on a Q Exactive HF mass spectrometer (Thermo Scientific) using a data-  
799 dependent acquisition top 10 method, AGC target 3e6, maximum injection time of 32 msec, scan  
800 range of 375-1500 m/z and a resolution of 60K. MS/MS was performed at a resolution of 15K,  
801 AGC target 1e5, maximum injection time of 60 msec, isolation window 1.4 m/z. Dynamic exclusion  
802 was set to 20 seconds. Raw mass spectrometry data were processed using the MaxQuant  
803 software Version 1.6.10.43 ([www.maxquant.org](http://www.maxquant.org)) with the Andromeda search engine integrated  
804 into MaxQuant environment. The MS/MS spectra were searched against the mouse UniProt  
805 sequence database without spliced isoforms. All MS/MS spectra were searched with the following  
806 MaxQuant parameters for peptide identification: acetyl (protein N-terminus) and methionine  
807 oxidation, were selected as variable modifications; cysteine carbamidomethylation was selected  
808 as fixed modification. A maximum of 2 missed cleavages were allowed. Peptide spectrum  
809 matches and proteins were automatically filtered to a 1% false discovery rate based on  
810 Andromeda score, peptide length, and individual peptide mass errors. Modified peptides required  
811 a minimum peptide length of at least six amino acids (AA).

812 **Quantification.** TMT reporter ion intensity values were quantified from MS2 scans using an  
813 integration tolerance of 20 ppm (Orbitrap) with the most confident centroid setting (Maxquant  
814 1.6.10.43) for matching peptides. For interactome analysis, raw reporter ion abundance was used  
815 for further analysis. MSstatsTMT workflow starts from the peptide intensities reported in  
816 Maxquant's evidence.txt file. When a peptide and charge combination was measured multiple  
817 times in a sample, only the maximum intensity was kept. The log<sub>2</sub> peptide intensities were median  
818 normalized assuming equal input loading of all channels. Peptide intensities were summarized to  
819 protein intensities using Tukey's median polish algorithm<sup>2228</sup>. MSstatsTMT builds protein-wise  
820 linear models based on these protein summaries, which was used for AP-MS proteomics analysis.

## 821 **SPR binding assay:**

822 The binding affinity and kinetics of binding were measured using Surface Plasmon Resonance  
823 based binding assay<sup>29</sup>. These experiments were carried out on Biacore B3000 (Cytiva Inc) and  
824 Sierra Sensors (now Bruker) MASS-1 instruments. There was no significant difference in results  
825 obtained on both these instruments. Bap-tagged BDK protein was captured on a Streptavidin  
826 coated sensor chip to achieve about 4000 to 4500 RUs of surface density. All the samples were  
827 prepared in buffer consisting of 10mM HEPES, pH 7.5, 150 mM NaCl, 2 mM MgCl<sub>2</sub>, 0.005%

828 Tween-20 and 2% DMSO. The same buffer was used as the running buffer during the  
829 experiments. Compound samples were injected at a flow rate of 30  $\mu$ L/min for 120 seconds of  
830 association time followed by at least 300 seconds of dissociation period. The compounds were  
831 tested in a concentration series consisting of at least 6 samples made with 2-fold dilution. The  
832 highest concentration was selected based on compound potency in the biochemical assay or  
833 binding affinity observed in a previous experiment. Multiple blank injections were run before and  
834 after each compound series to allow double reference subtraction during data processing and  
835 analysis. Radicicol was tested in every experiment as a positive control to assess activity of the  
836 captured protein on the surface. A DMSO curve was run during each experiment to properly  
837 correct for excluded volume. The data were processed and analyzed using Bruker Analyzer,  
838 Scrubber and Biaeval softwares to calculate binding affinities and kinetics by fitting the data to  
839 1:1 binding model.

840

841

#### 842 **Supplementary References:**

843

- 844 1. Wright, W.B. Preparation of 3-chlorothiopheno[3,2-b]thiophene derivatives from thiophene-2-  
845 acrylic acids. *J. Heterocycl. Chem.* **9**, 879-882 (1972).
- 846 2. Davie, J.R. *et al.* Expression and characterization of branched-chain alpha-ketoacid  
847 dehydrogenase kinase from the rat. Is it a histidine-protein kinase? *J Biol Chem* **270**, 19861-  
848 19867 (1995).
- 849 3. Machius, M., Chuang, J.L., Wynn, R.M., Tomchick, D.R. & Chuang, D.T. Structure of rat BCKD  
850 kinase: nucleotide-induced domain communication in a mitochondrial protein kinase. *Proc Natl*  
851 *Acad Sci U S A* **98**, 11218-11223 (2001).
- 852 4. Vonrhein, C. *et al.* Data processing and analysis with the autoPROC toolbox. *Acta Crystallogr. D.*  
853 *Biol. Crystallogr.* **67**, 293-302 (2011).
- 854 5. Bricogne G., B.E., Brandl M., Flensburg C., Keller P., Paciorek W., Roversi P, Sharff A., Smart O.S.,  
855 Vonrhein C., Womack T.O. (Global Phasing Ltd., Cambridge, United Kingdom; 2017).
- 856 6. Emsley P, C.K. (2004).
- 857 7. Smart OS, W., TO, Sharff A, Flensburg C, Keller P, Paciorek W, Vonrhein C and Bricogne G  
858 (Global Phasing Ltd., Cambridge, United Kingdom; 2014).
- 859 8. Madhavi Sastry, G., Adzhigirey, M., Day, T., Annabhimoju, R. & Sherman, W. Protein and ligand  
860 preparation: parameters, protocols, and influence on virtual screening enrichments. *J. Comput.*  
861 *Aided Mol. Des.* **27**, 221-234 (2013).
- 862 9. Schrödinger (
- 863 10. Epik (New York, NY; 2021).
- 864 11. Impact (New York, NY; 2021).
- 865 12. Prime (New York, NY; 2021).
- 866 13. Jacobson, M.P., Friesner, R.A., Xiang, Z. & Honig, B. On the role of the crystal environment in  
867 determining protein side-chain conformations. *J. Mol. Biol.* **320**, 597-608 (2002).
- 868 14. Jacobson, M.P. *et al.* A hierarchical approach to all-atom protein loop prediction. *Proteins:*  
869 *Structure, Function, and Bioinformatics* **55**, 351-367 (2004).
- 870 15. Bowers, K.J. *et al.* in Proceedings of the ACM/IEEE Conference on Supercomputing (SC06)  
871 (Tampa, Florida.
- 872 16. Desmond (New York, NY; 2021).
- 873 17. Schrödinger (New York, NY; 2021).

- 874 18. Lu, C. *et al.* OPLS4: Improving force field accuracy on challenging regimes of chemical space.  
875 *Journal of Chemical Theory and Computation* **17**, 4291-4300 (2021).
- 876 19. Jorgensen, W.L., Chandrasekhar, J., Madura, J.D., Impey, R.W. & Klein, M.L. Comparison of  
877 simple potential functions for simulating liquid water. *The Journal of Chemical Physics* **79**, 926-  
878 935 (1983).
- 879 20. Knapp, B., Ospina, L. & Deane, C.M. Avoiding false positive conclusions in molecular simulation:  
880 The importance of replicas. *Journal of Chemical Theory and Computation* **14**, 6127-6138 (2018).
- 881 21. Vassaux, M., Wan, S., Edeling, W. & Coveney, P.V. Ensembles Are Required to Handle Aleatoric  
882 and Parametric Uncertainty in Molecular Dynamics Simulation. *J Chem Theory Comput* **17**, 5187-  
883 5197 (2021).
- 884 22. Poongavanam, V. *et al.* Linker-Dependent Folding Rationalizes PROTAC Cell Permeability. *J. Med.*  
885 *Chem.* **65**, 13029-13040 (2022).
- 886 23. Ball, K.A. *et al.* Conformational Dynamics of the HIV-Vif Protein Complex. *Biophys. J.* **116**, 1432-  
887 1445 (2019).
- 888 24. Kato, M., Chuang, J.L., Tso, S.C., Wynn, R.M. & Chuang, D.T. Crystal structure of pyruvate  
889 dehydrogenase kinase 3 bound to lipoyl domain 2 of human pyruvate dehydrogenase complex.  
890 *EMBO J.* **24**, 1763-1774 (2005).
- 891 25. Tso, S.C. *et al.* Structure-based design and mechanisms of allosteric inhibitors for mitochondrial  
892 branched-chain alpha-ketoacid dehydrogenase kinase. *Proc Natl Acad Sci U S A* **110**, 9728-9733  
893 (2013).
- 894 26. Tso, S.C. *et al.* Benzothiophene carboxylate derivatives as novel allosteric inhibitors of branched-  
895 chain alpha-ketoacid dehydrogenase kinase. *J. Biol. Chem.* **289**, 20583-20593 (2014).
- 896 27. Maguolo, A. *et al.* A gain-of-function mutation on BCKDK gene and its possible pathogenic role in  
897 branched-chain amino acid metabolism. *Genes* **13**, 233 (2022).
- 898 28. Huang, T. *et al.* MSstatsTMT: Statistical detection of differentially abundant proteins in  
899 experiments with isobaric labeling and multiple mixtures. *Mol Cell Proteomics* **19**, 1706-1723  
900 (2020).
- 901 29. Liu, S. *et al.* Structural studies identify angiotensin II receptor blocker-like compounds as  
902 branched-chain ketoacid dehydrogenase kinase inhibitors. *J Biol Chem* **299**, 102959 (2023).

903

# Supplementary Figure 11. Western blots

Related to Figure 1

pBCKDH

BCKDH

pBCKDH pS292 (Bethyl A304-672A 1:1000)  
 total BCKDH (Yenzym 037 1:1000)  
 BDK (abcam ab128935 1:1000)  
 GAPDH (CST 14C10 1:10000)

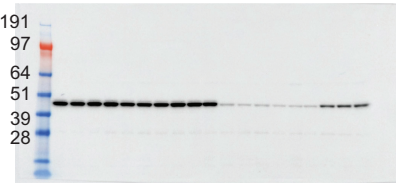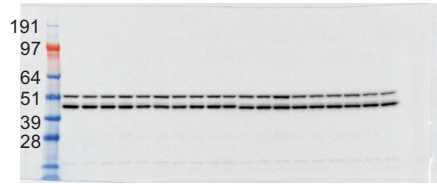

BDK

GAPDH

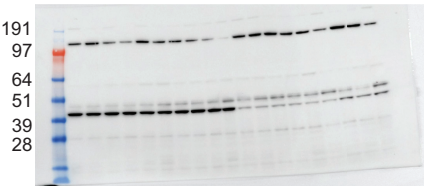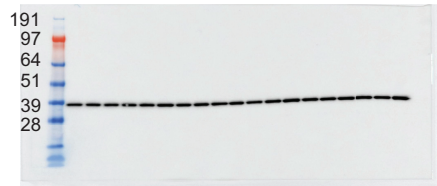

Related to Figure 6A

pBCKDH

BCKDH

Related to Figure 6C

pBCKDH

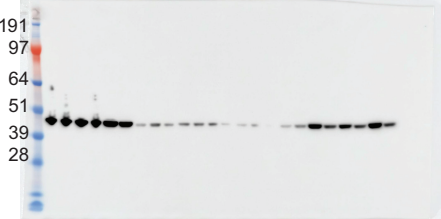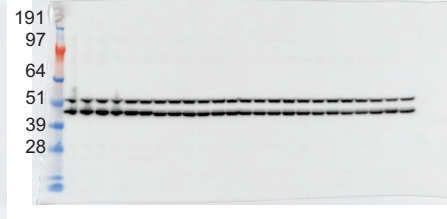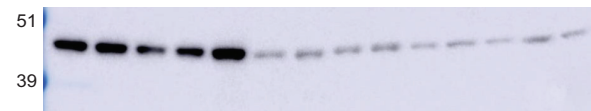

BDK

GAPDH

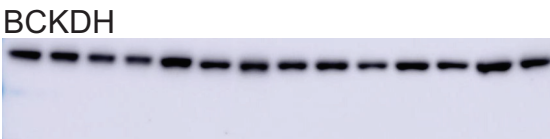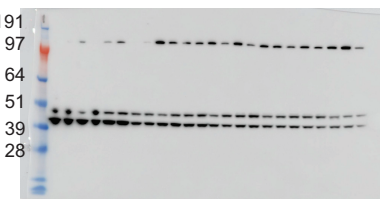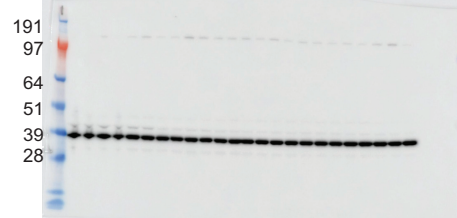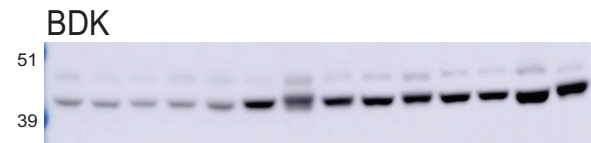

GAPDH

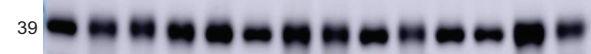

Related to Figure 6E

BDK

pBCKDH

Related to Figure 7A

BDK

pBCKDH

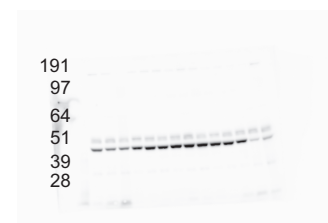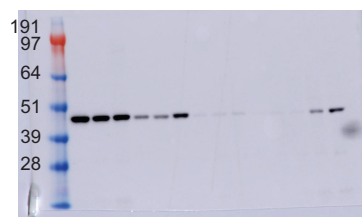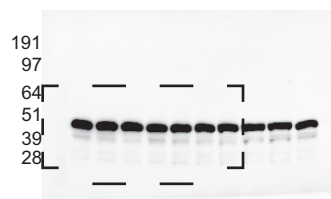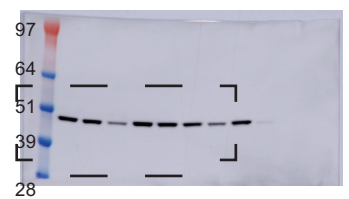

BCKDH

GAPDH

BCKDH

GAPDH

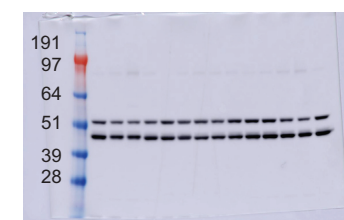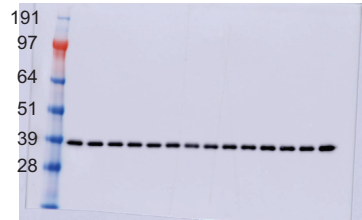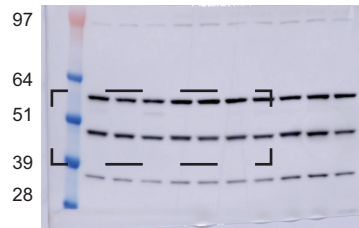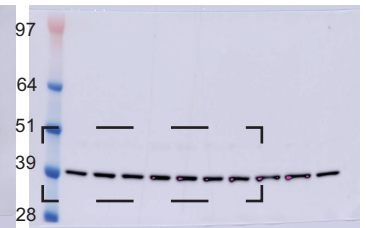

Related to Figure 7C

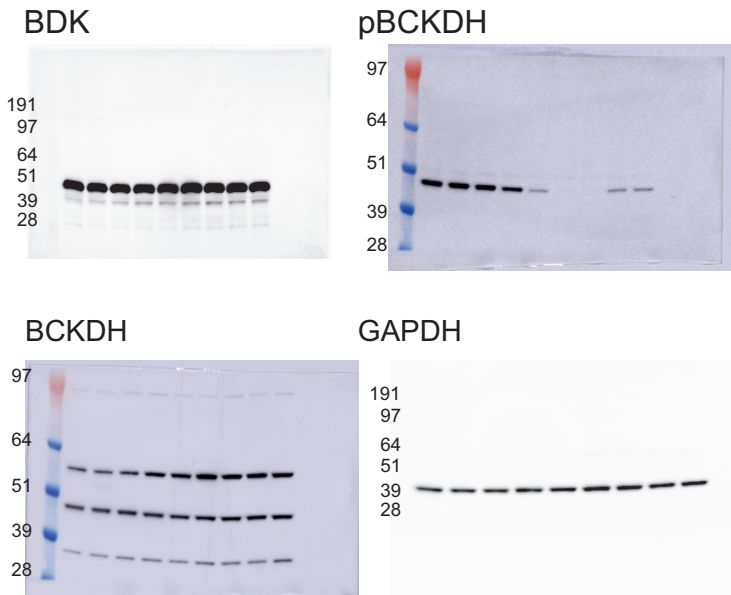

Related to Figure 8B

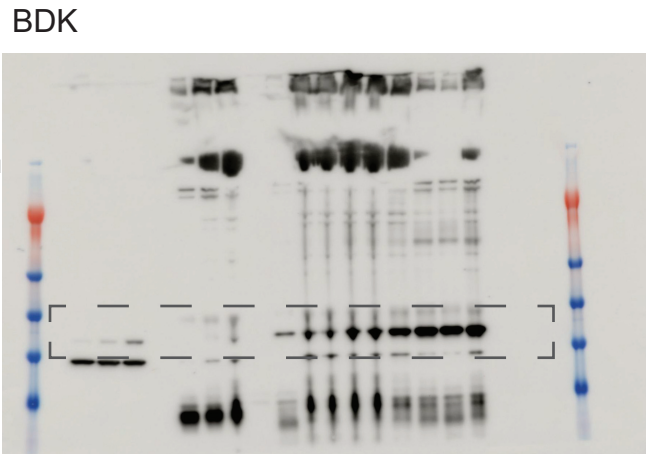

Related to Supplementary Figure 8E

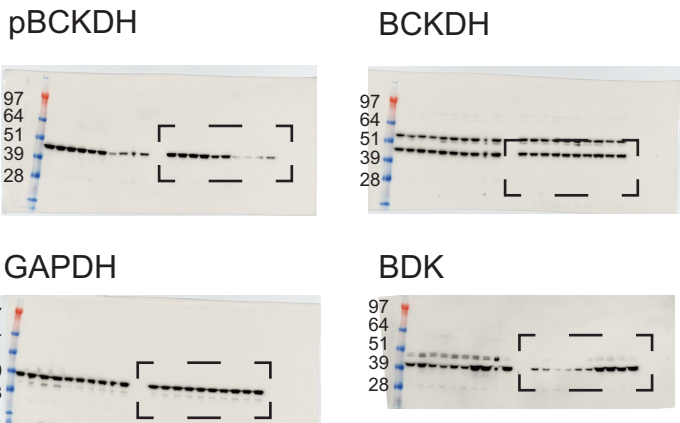

Related to Supplementary Figure 8F

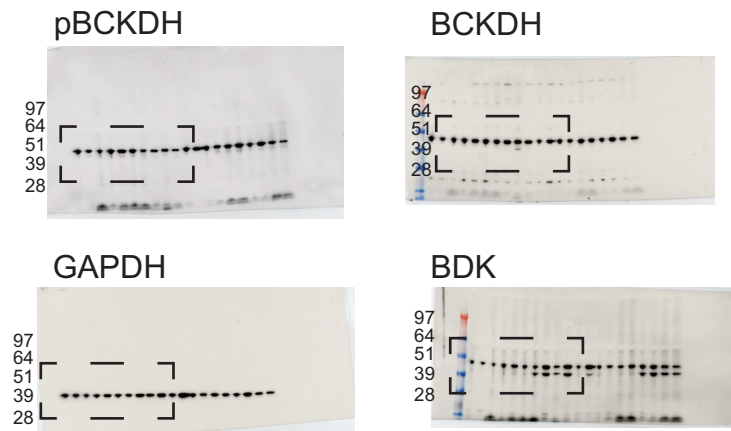

# Supplementary Figure 12. 1H NMR of compound S4

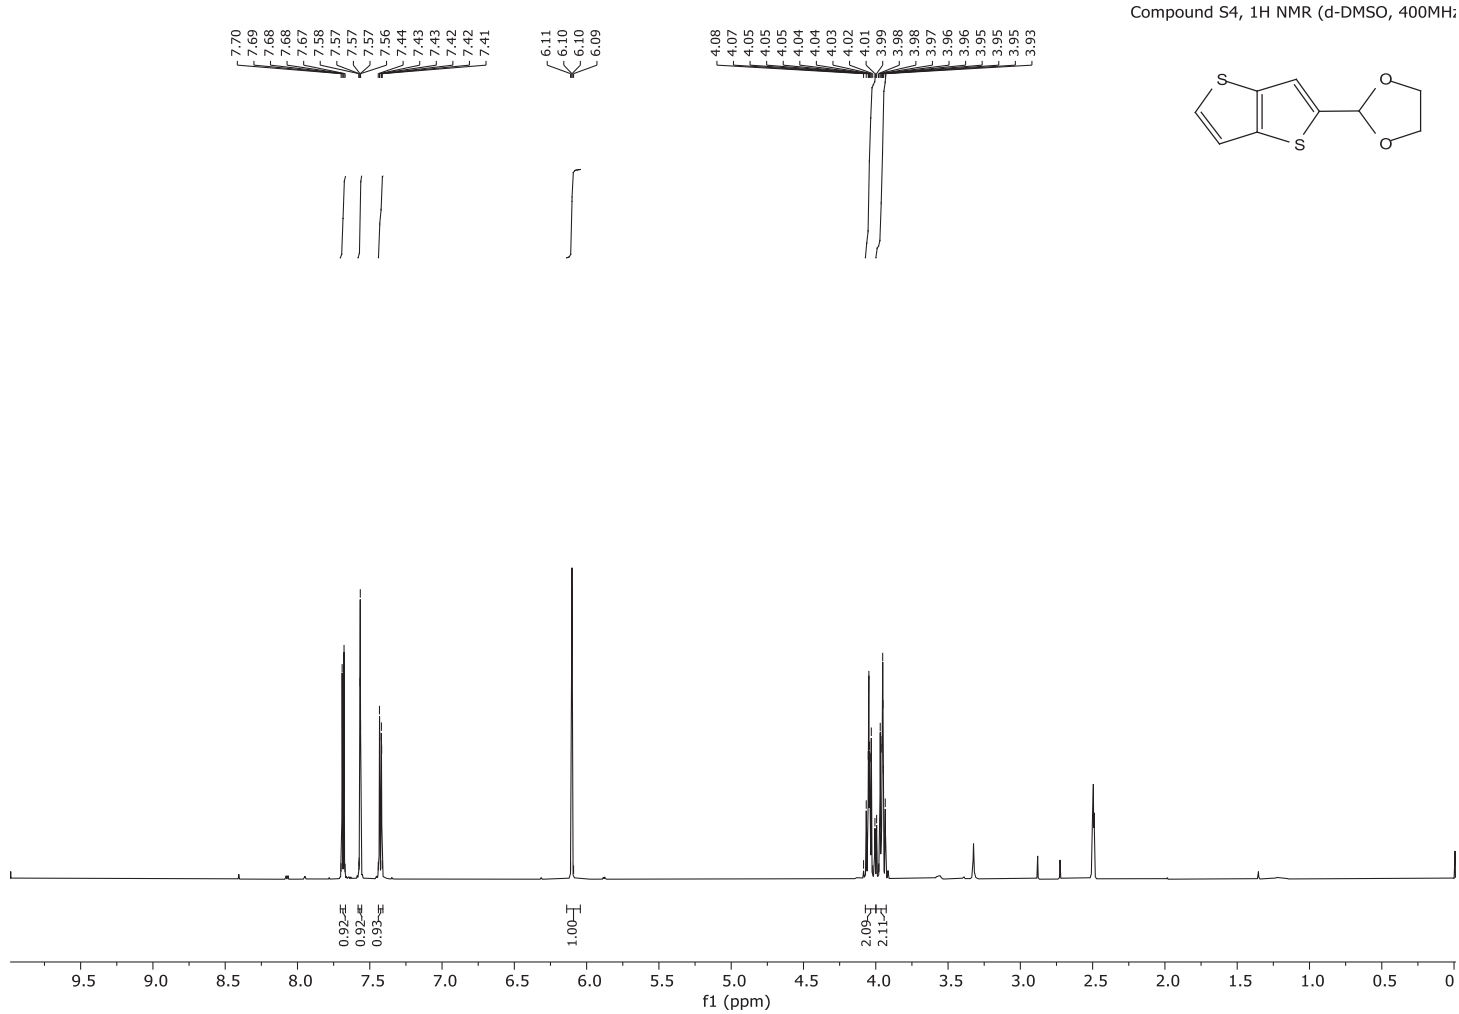



## Supplementary Figure 13. HRMS of compound S4

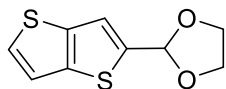

S4

| Open Access HRMS Sample Report |                                                             |                    |                            |
|--------------------------------|-------------------------------------------------------------|--------------------|----------------------------|
| Sample ID                      | 00110407-5465-005                                           | HPLC               | Agilent 1200               |
| Molecular Formula              | C <sub>9</sub> H <sub>8</sub> O <sub>2</sub> S <sub>2</sub> | Mass Spectrometer  | Sciex 5600+ QToF           |
| Submittor                      | Martinez Alsina, Luis A                                     | DAD                | 190-400 nm, reported 270nm |
| Run Date                       | 4/4/2023                                                    | MS Scan            | 100-2000 amu               |
| Analyst                        | Quinn, Alandra                                              | Acquisition Method | HRMS-3min gradient AQ      |
| Analyst's CeN                  | 00714673-0163                                               | eWB Archive Ref    | 00713459-0292              |

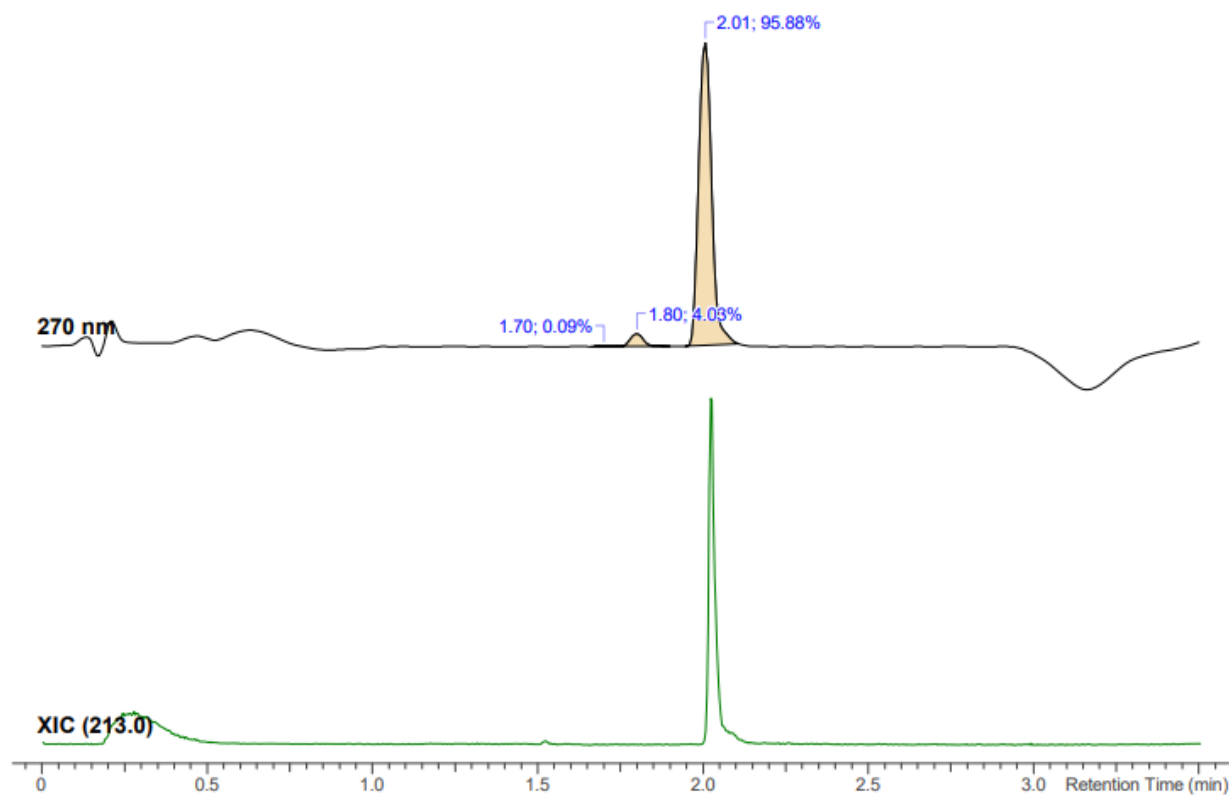

| No. | Peak Name                                                   | tR (min) | Area (%) |
|-----|-------------------------------------------------------------|----------|----------|
| 1   | unknown                                                     | 1.70     | 0.09     |
| 2   | unknown                                                     | 1.80     | 4.03     |
| 3   | C <sub>9</sub> H <sub>8</sub> O <sub>2</sub> S <sub>2</sub> | 2.01     | 95.88    |

● Spectrum from 00110407-5465-005.wiff (sample 1) - 00110407-5465-005, +TOF MS (100 - 2000) from 1.981 to 2.076 min  
 ● Isotopic Distribution for C<sub>9</sub>H<sub>8</sub>O<sub>2</sub>S<sub>2</sub> H<sup>+</sup>

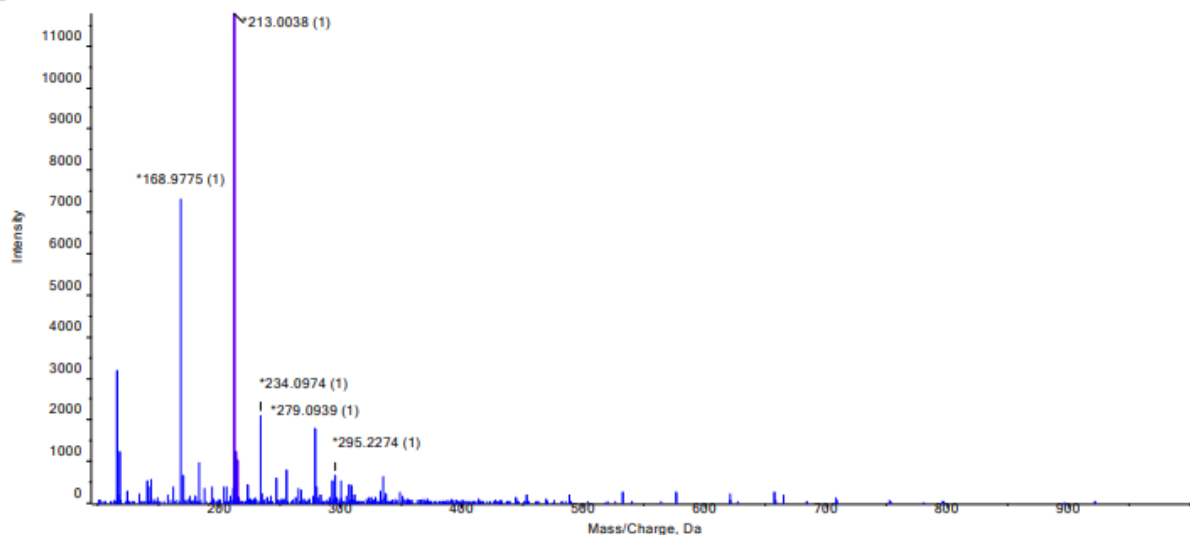

● Spectrum from 00110407-5465-005.wiff (sample 1) - 00110407-5465-005, +TOF MS (100 - 2000) from 1.981 to 2.076 min  
 ● Isotopic Distribution for C<sub>9</sub>H<sub>8</sub>O<sub>2</sub>S<sub>2</sub> H<sup>+</sup>

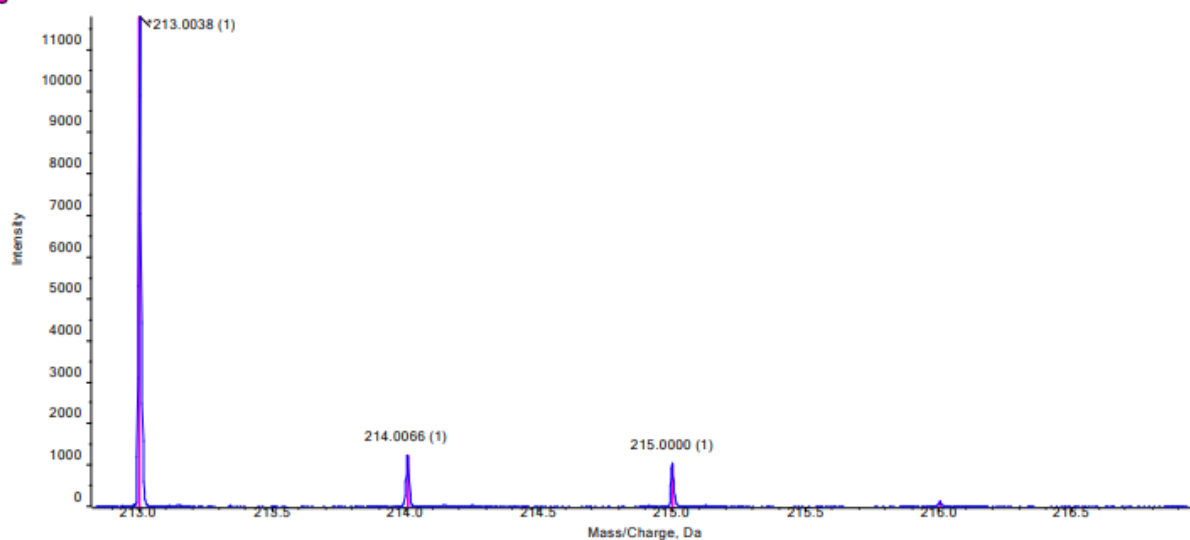

| Peak at 2.01 min in UV |        |                   |                                                             |                    |                 |             |                 |                       |
|------------------------|--------|-------------------|-------------------------------------------------------------|--------------------|-----------------|-------------|-----------------|-----------------------|
| Mass/Charge (Da)       | Height | Relative % Height | Compound                                                    | Peak Type          | Theoretical m/z | Error (ppm) | Theoretical m/z | Theoretical Intensity |
| 213.0038               | 11774  | 100.0             | C <sub>9</sub> H <sub>8</sub> O <sub>2</sub> S <sub>2</sub> | [M+H] <sup>+</sup> | 213.0039        | -0.1        | 213.0039        | 100.0                 |
| 214.0066               | 1237   | 10.5              |                                                             |                    |                 |             | 214.0067        | 11.8                  |
| 215.0000               | 1046   | 8.9               |                                                             |                    |                 |             | 215.0006        | 9.9                   |
| 216.0037               | 128    | 1.1               |                                                             |                    |                 |             | 216.0033        | 1.0                   |

# Supplementary Figure 14. HPLC of compound S4

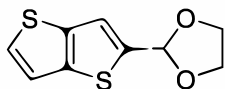

**S4**

Sampl. Name: 00132438-141-05

Acq. Method: D:\Chem32\HPLC-007\DATA\2019\040219\123790-040219-1820 2019-04-02  
13-39-26\AM-123790-02-M1.M

Data File: D:\CHEM32\HPLC-007\DATA\2019\040219\123790-040219-1820 2019-04-02  
13-39-26\00132438-141-05-.D

User Name: LN

Acq. Instrument: HPLC-007

Acq. Date: 04/02/2019 18:34:37

Injection Vol.: 2.0 µl

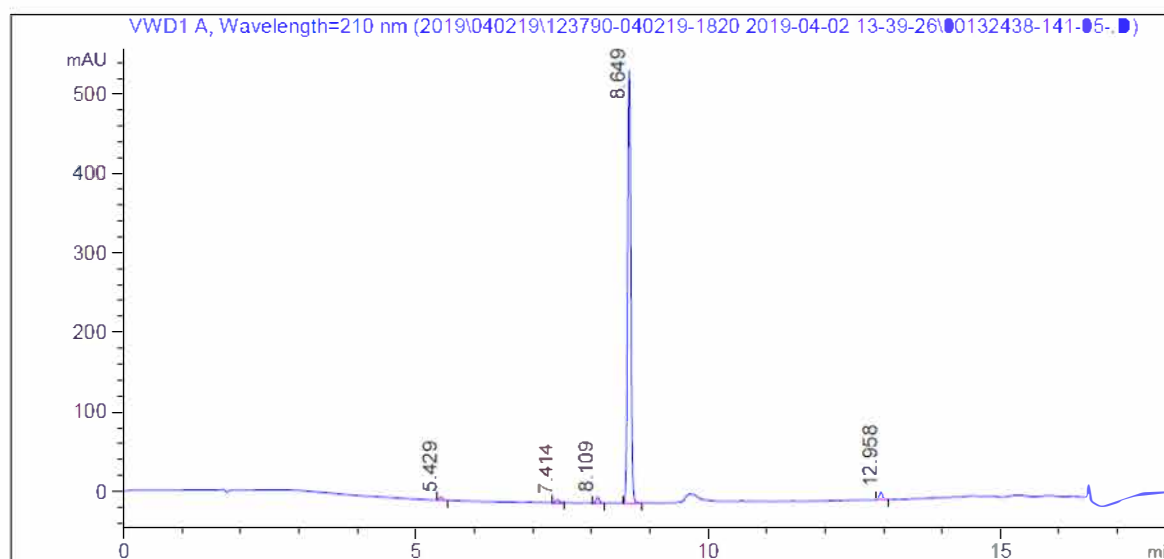

| # | Meas. Ret | Width  | Symmetry | Height   | Area      | Area %  |
|---|-----------|--------|----------|----------|-----------|---------|
| 1 | 5.4291    | 0.0630 | 0.8142   | 3.8512   | 14.5653   | 0.6555  |
| 2 | 7.4143    | 0.0780 | 0.9469   | 4.1883   | 19.5896   | 0.8816  |
| 3 | 8.1092    | 0.0639 | 0.9313   | 7.0948   | 27.2131   | 1.2247  |
| 4 | 8.6492    | 0.0649 | 0.9675   | 545.4932 | 2123.0632 | 95.5439 |
| 5 | 12.9580   | 0.0679 | 0.9056   | 9.2360   | 37.6493   | 1.6943  |

# Supplementary Figure 15. <sup>1</sup>H NMR of compound S5

Compound S5, <sup>1</sup>H NMR (MeOD, 400MHz)

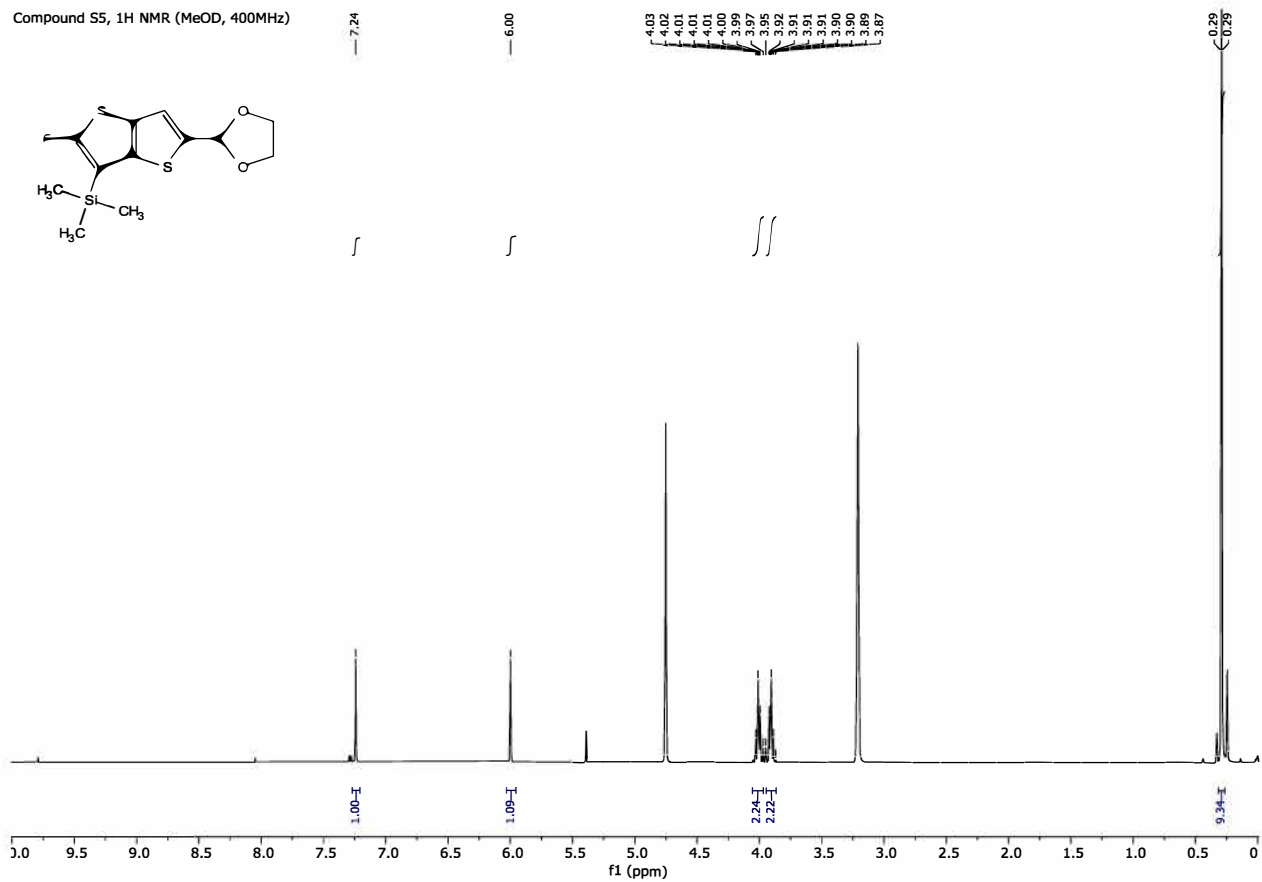

# Supplementary Figure 16. <sup>19</sup>F NMR of compound S5

Compound S5, <sup>19</sup>F NMR (MeOD, 400MHz)

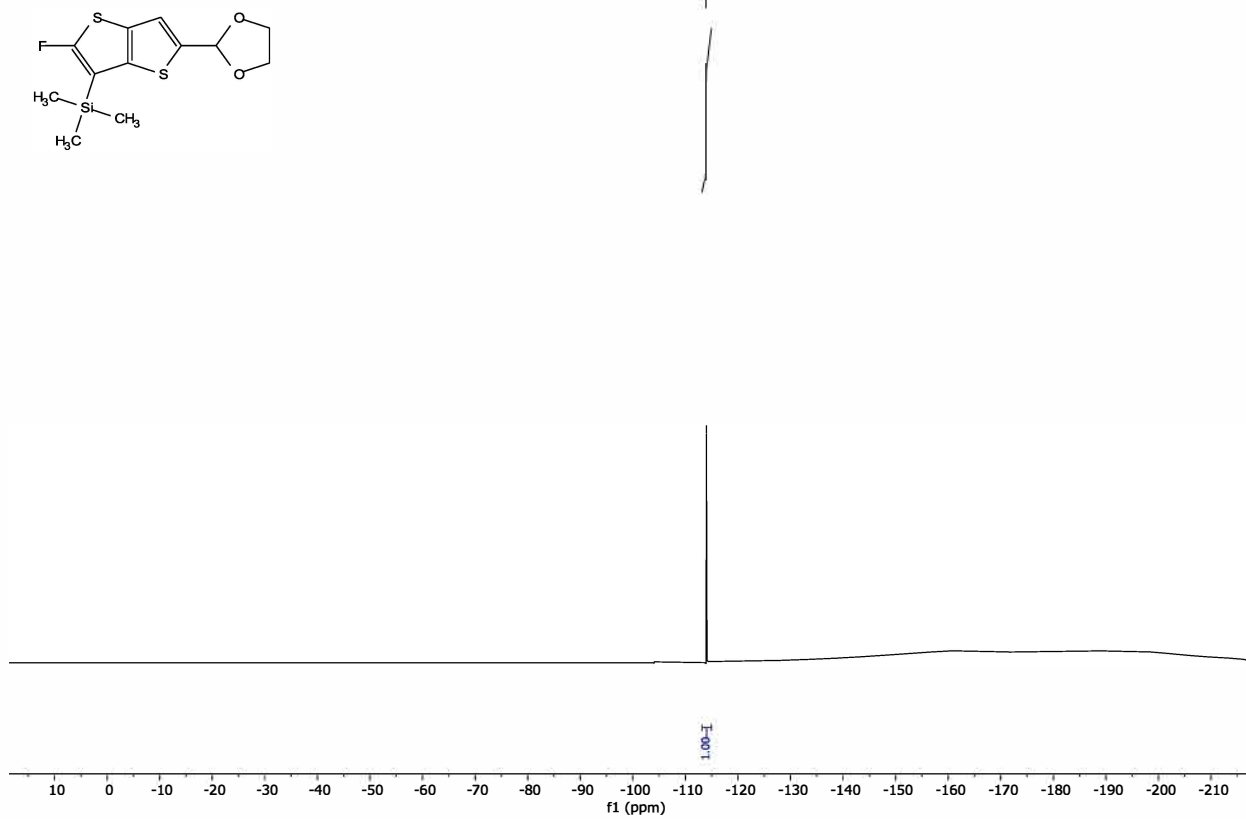

# Supplementary Figure 17. 1H NMR of compound S7

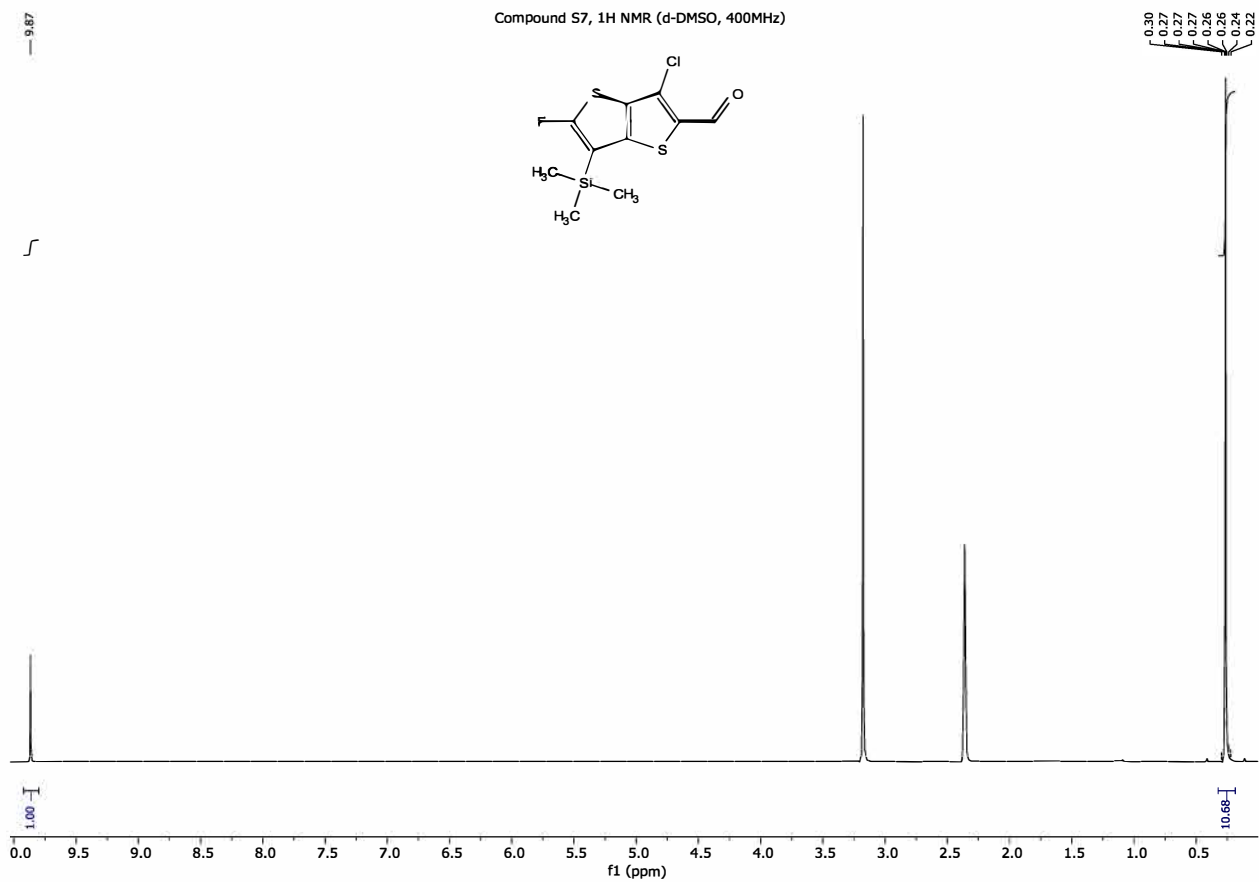

# Supplementary Figure 18. <sup>13</sup>C NMR of compound S7

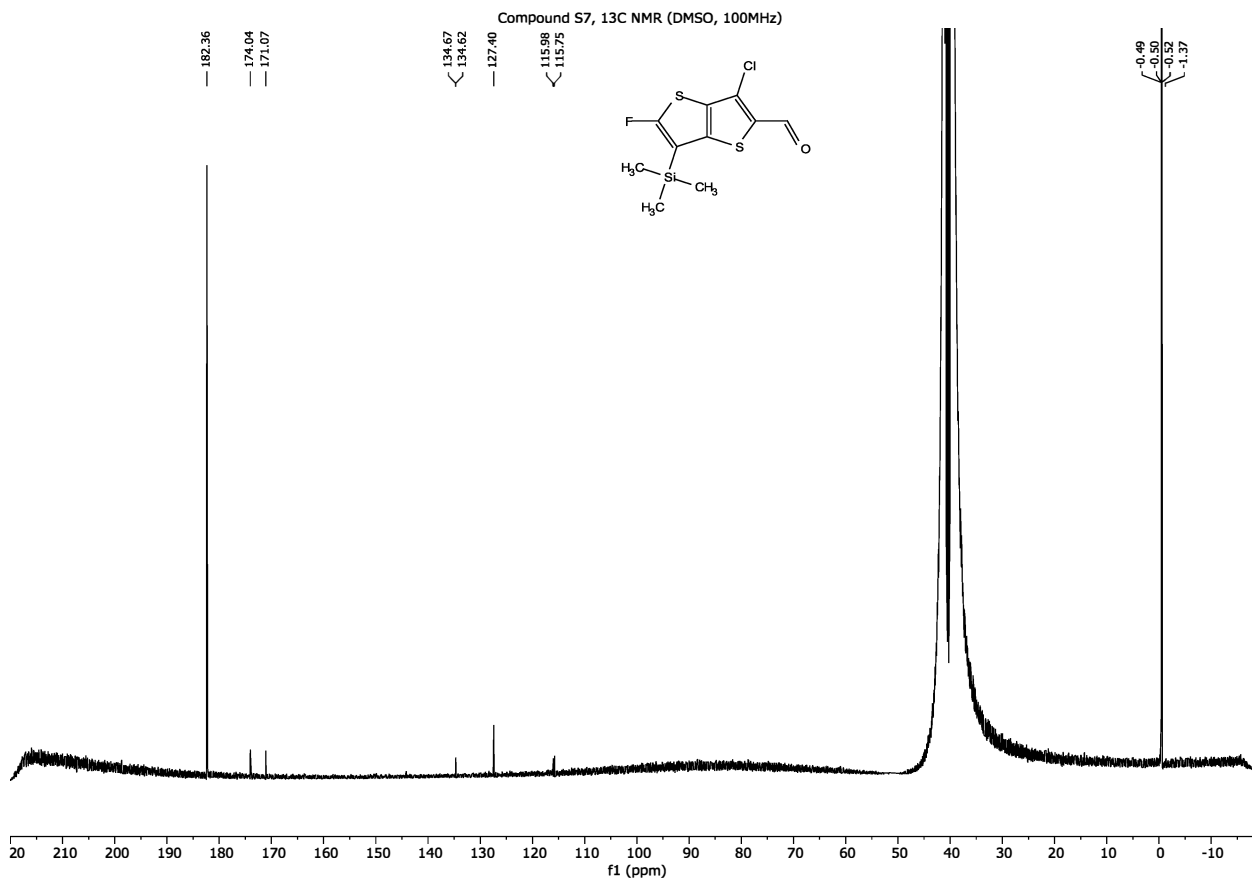

# Supplementary Figure 19. 19F NMR of compound S7

Compound S7, 19F NMR (d-DMSO, 400MHz)

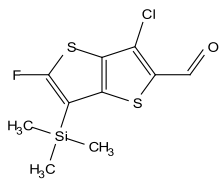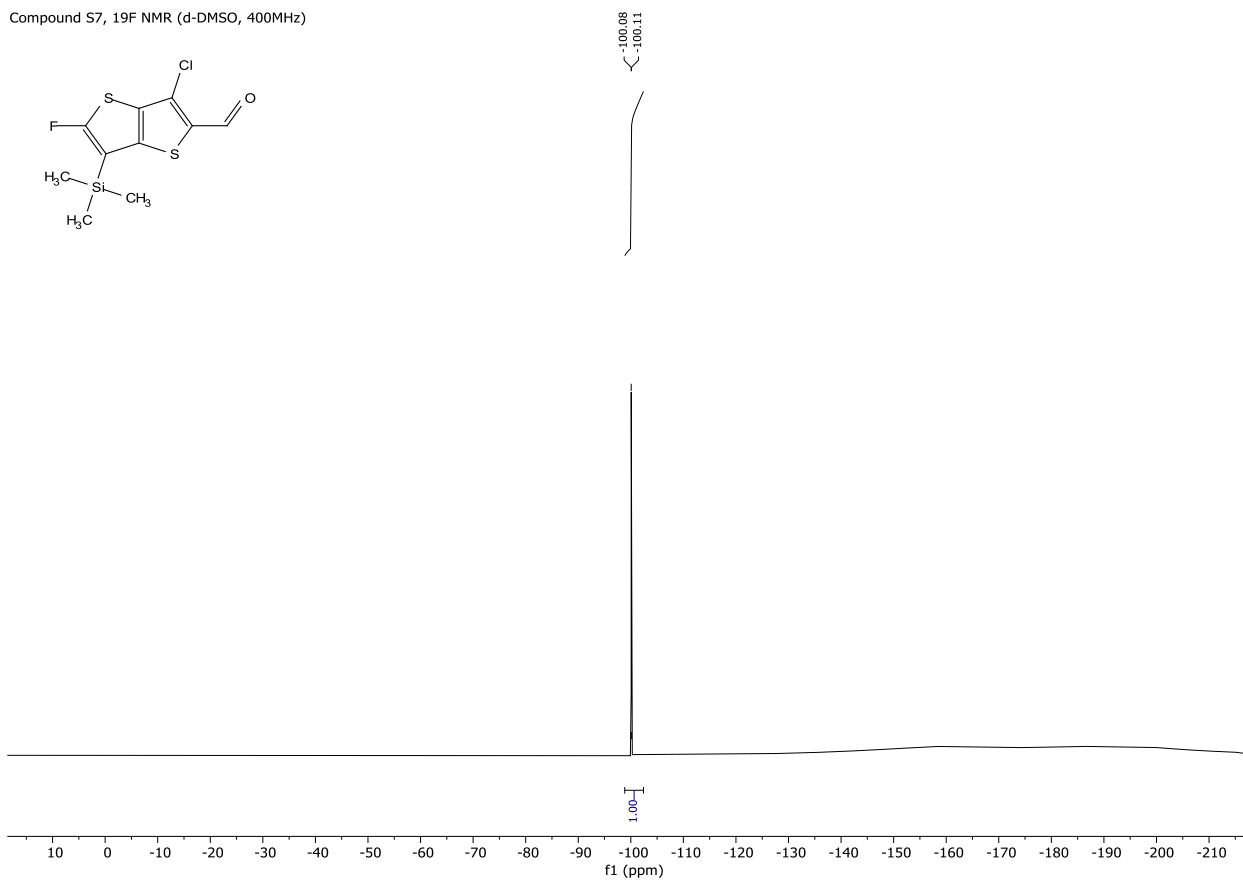



## Supplementary Figure 20. HRMS of compound S7

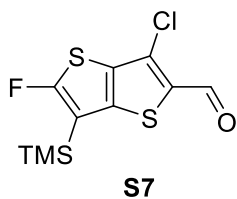

| Open Access HRMS Sample Report |                                                       |                    |                            |
|--------------------------------|-------------------------------------------------------|--------------------|----------------------------|
| Sample ID                      | 00110407-5465-003                                     | HPLC               | Agilent 1200               |
| Molecular Formula              | C <sub>10</sub> H <sub>10</sub> ClFOS <sub>2</sub> Si | Mass Spectrometer  | Sciex 5600+ QToF           |
| Submittor                      | Martinez Alsina, Luis A                               | DAD                | 190-400 nm, reported 270nm |
| Run Date                       | 4/4/2023                                              | MS Scan            | 100-2000 amu               |
| Analyst                        | Quinn, Alandra                                        | Acquisition Method | HRMS-3min gradient AQ      |
| Analyst's CeN                  | 00714673-0163                                         | eWB Archive Ref    | 00713459-0292              |

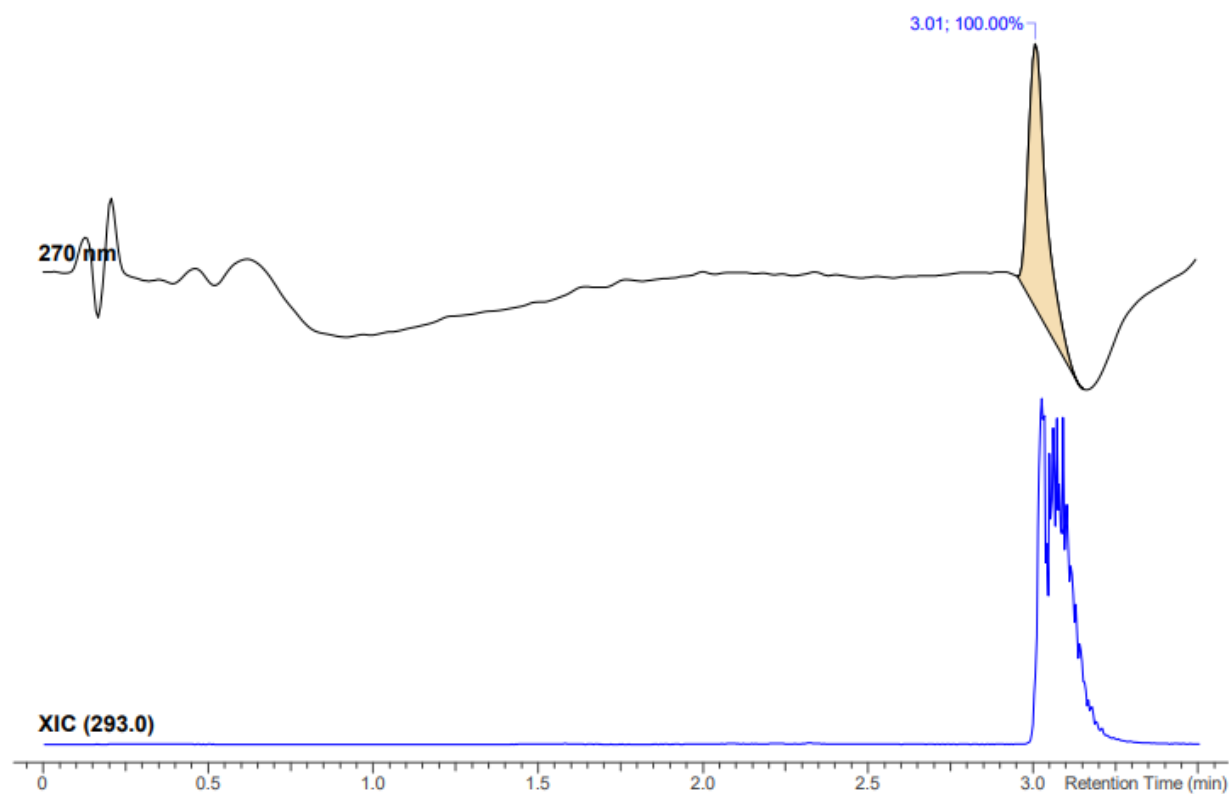

| No. | Peak Name                                             | tR (min) | Area (%) |
|-----|-------------------------------------------------------|----------|----------|
| 1   | C <sub>10</sub> H <sub>10</sub> ClFOS <sub>2</sub> Si | 3.01     | 100.00   |

● Spectrum from 00110407-5465-003.wiff (sample 1) - 00110407-5465-003, +TOF MS (100 - 2000) from 3.004 to 3.111 min  
 ● Isotopic Distribution for C<sub>10</sub>H<sub>10</sub>ClFOS<sub>2</sub>Si H<sup>+</sup>

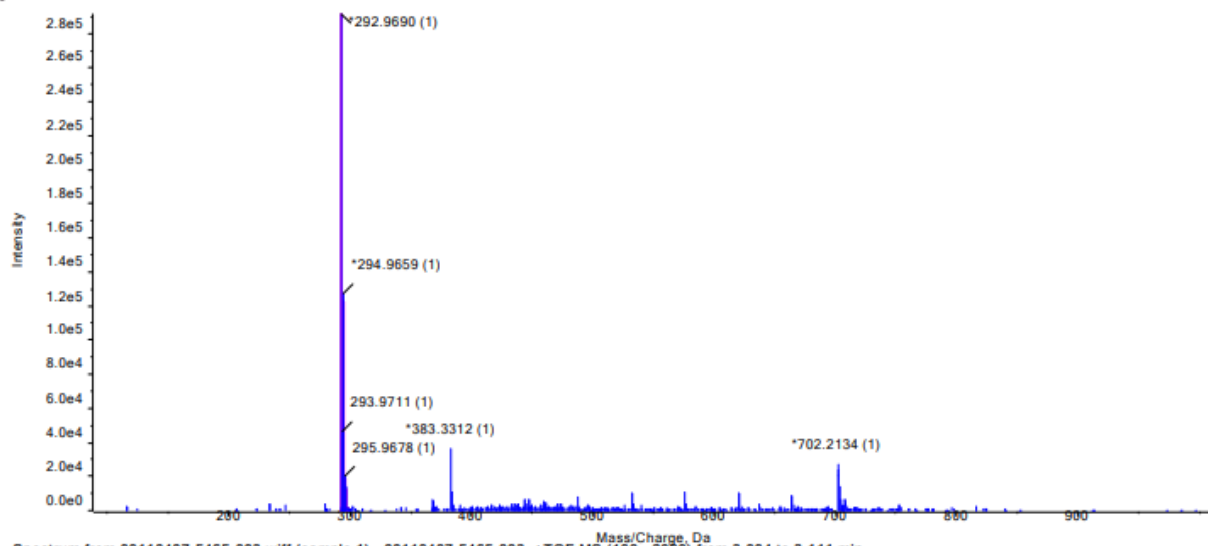

● Spectrum from 00110407-5465-003.wiff (sample 1) - 00110407-5465-003, +TOF MS (100 - 2000) from 3.004 to 3.111 min  
 ● Isotopic Distribution for C<sub>10</sub>H<sub>10</sub>ClFOS<sub>2</sub>Si H<sup>+</sup>

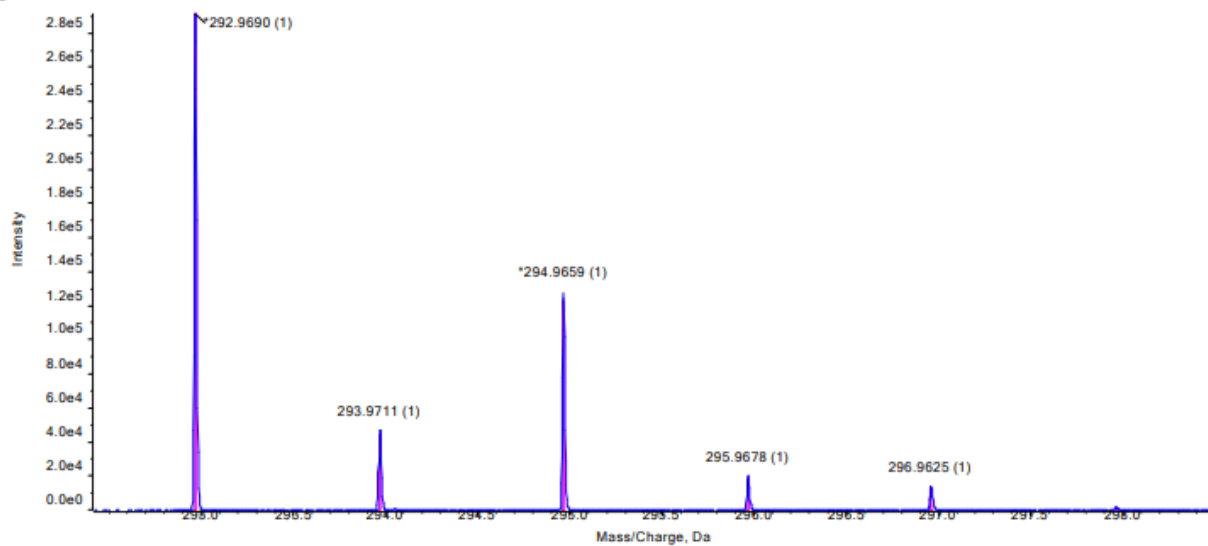

| Peak at 3.01 min in UV |        |                   |                                                       |                    |                 |             |                 |                       |
|------------------------|--------|-------------------|-------------------------------------------------------|--------------------|-----------------|-------------|-----------------|-----------------------|
| Mass/Charge (Da)       | Height | Relative % Height | Compound                                              | Peak Type          | Theoretical m/z | Error (ppm) | Theoretical m/z | Theoretical Intensity |
| 292.9690               | 291363 | 100.0             | C <sub>10</sub> H <sub>10</sub> ClFOS <sub>2</sub> Si | [M+H] <sup>+</sup> | 292.9688        | 0.8         | 292.9688        | 100.0                 |
| 293.9711               | 46906  | 16.1              |                                                       |                    |                 |             | 293.9707        | 17.9                  |
| 294.9659               | 127292 | 43.7              |                                                       |                    |                 |             | 294.9658        | 45.8                  |
| 295.9678               | 19914  | 6.8               |                                                       |                    |                 |             | 295.9677        | 7.8                   |
| 296.9625               | 13923  | 4.8               |                                                       |                    |                 |             | 296.9629        | 5.1                   |

# Supplementary Figure 21. HPLC of compound S7

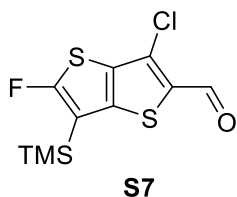

```
=====
Acq. Operator   : SYSTEM                      Seq. Line :    3
Sample Operator : SYSTEM
Acq. Instrument : LC-325GF                    Location  :    3
Injection Date  : 3/17/2023 4:12:37 PM       Inj       :    1
                                           Inj Volume: 5.000 µl
Different Inj Volume from Sample Entry! Actual Inj Volume : 10.000 µl
Sequence File   : C:\Users\Public\Documents\ChemStation\1\Data\DEF_LC_2021 2023-03-17 15-41
                 -03\DEF_LC_2021.S
Method          : C:\Users\Public\Documents\ChemStation\1\Data\DEF_LC_2021 2023-03-17 15-41
                 -03\ACID_CLASSIC.M (Sequence Method)
Last changed    : 6/8/2017 9:26:22 AM by SYSTEM
Method Info     : ACID METHOD for classic look on new Chemstation software
                 Column: XBridge C18 5 micron (4.6 mm x 150 mm)
                 Flow rate: 1.500 mL/min with solvents containing 0.1% TFA
                 0-1.5 min: 5% acetonitrile/water
                 1.5-10 min: 5-100% acetonitrile water
                 10-11 min: 100% acetonitrile
                 11-12.5 min: 100-5% acetonitrile/water
=====
```

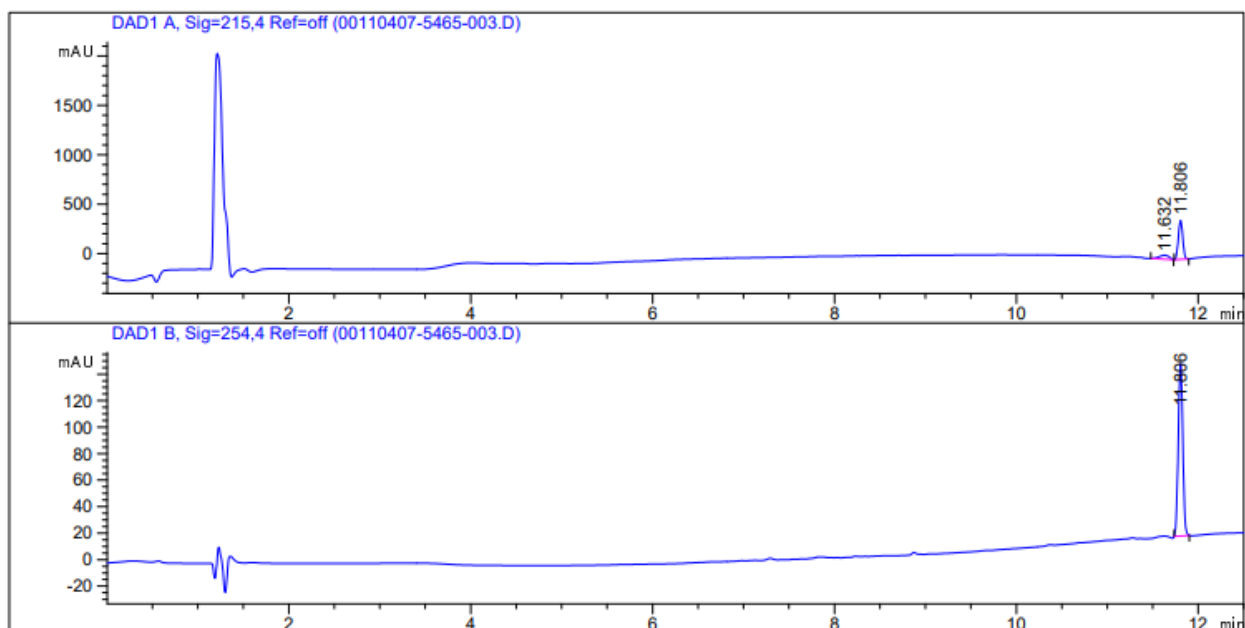

```
=====
                          Area Percent Report
=====
```

```
Sorted By      :      Signal
Multiplier     :      1.0000
Dilution       :      1.0000
Do not use Multiplier & Dilution Factor with ISTDs
```

Signal 1: DAD1 A, Sig=215,4 Ref=off

| Peak # | RetTime [min] | Type | Width [min] | Area [mAU*s] | Height [mAU] | Area %  |
|--------|---------------|------|-------------|--------------|--------------|---------|
| 1      | 11.632        | BB   | 0.1213      | 314.89941    | 42.08999     | 19.1677 |
| 2      | 11.806        | BB   | 0.0511      | 1327.96643   | 396.49451    | 80.8323 |

Totals : 1642.86584 438.58450

Signal 2: DAD1 B, Sig=254,4 Ref=off

| Peak # | RetTime [min] | Type | Width [min] | Area [mAU*s] | Height [mAU] | Area %   |
|--------|---------------|------|-------------|--------------|--------------|----------|
| 1      | 11.806        | BB   | 0.0523      | 453.53329    | 131.35742    | 100.0000 |

Totals : 453.53329 131.35742

=====  
\*\*\* End of Report \*\*\*

# Supplementary Figure 22. <sup>1</sup>H NMR of compound S8

Compound S8, <sup>1</sup>H NMR (DMSO, 400MHz)

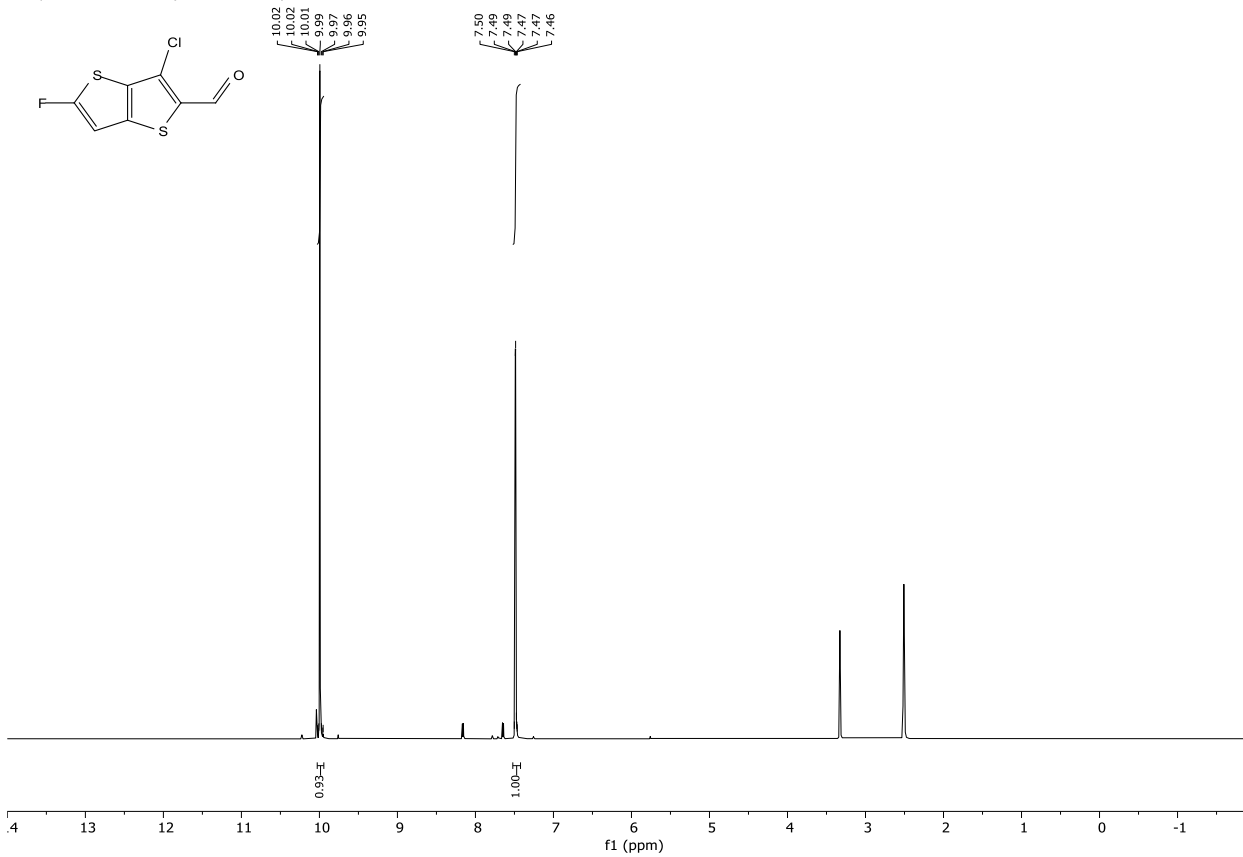

# Supplementary Figure 23. <sup>13</sup>C NMR of compound S8

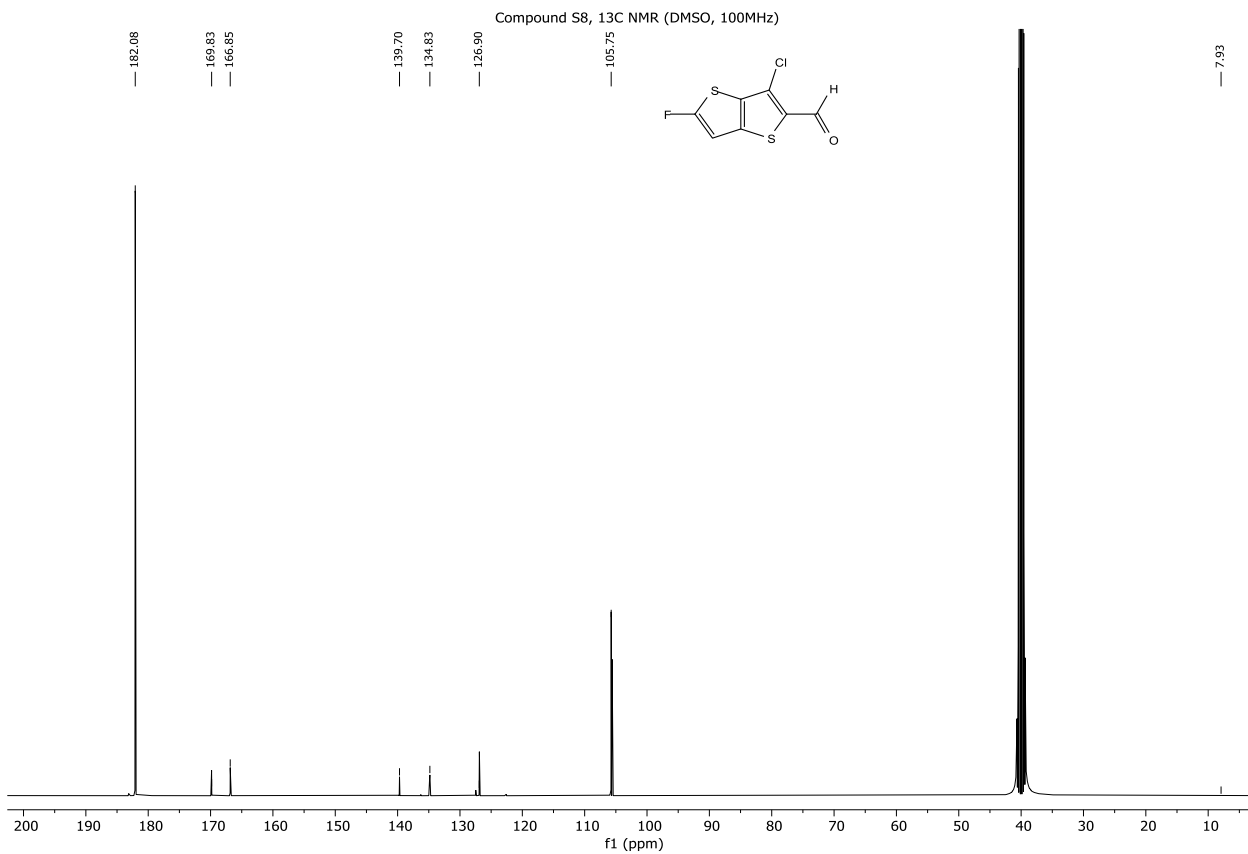

# Supplementary Figure 24. <sup>19</sup>F NMR of compound S8

Compound S8, <sup>19</sup>F NMR (DMSO, 400MHz)

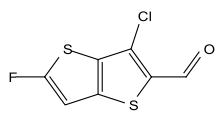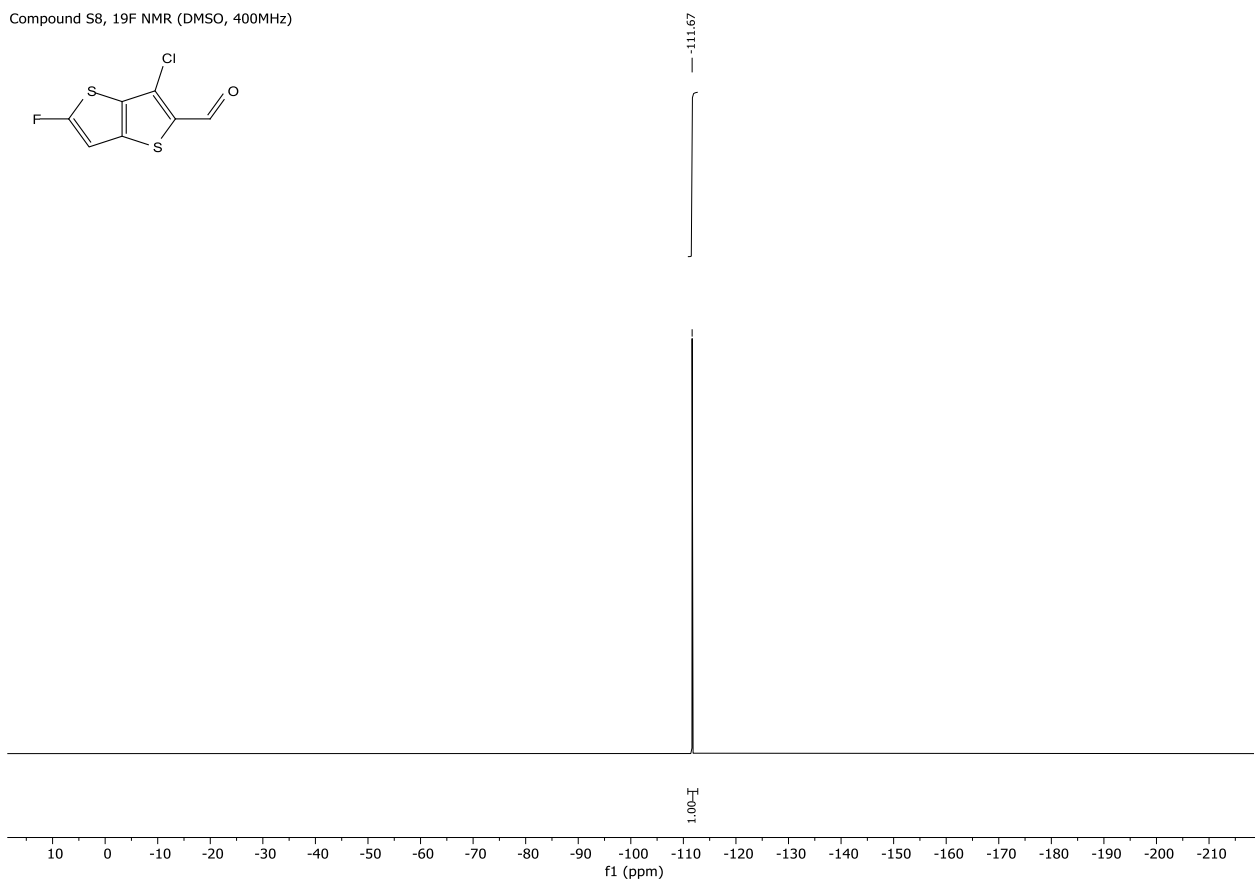

## Supplementary Figure 25. HRMS of compound S8

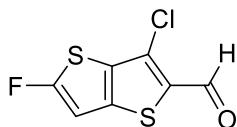

S8

| Open Access HRMS Sample Report |                         |                    |                            |
|--------------------------------|-------------------------|--------------------|----------------------------|
| Sample ID                      | 00110407-5465-004       | HPLC               | Agilent 1200               |
| Molecular Formula              | C7H2ClFOS2              | Mass Spectrometer  | Sciex 5600+ QToF           |
| Submittor                      | Martinez Alsina, Luis A | DAD                | 190-400 nm, reported 270nm |
| Run Date                       | 4/4/2023                | MS Scan            | 100-2000 amu               |
| Analyst                        | Quinn, Alandra          | Acquisition Method | HRMS-3min gradient AQ      |
| Analyst's CeN                  | 00714673-0163           | eWB Archive Ref    | 00713459-0292              |

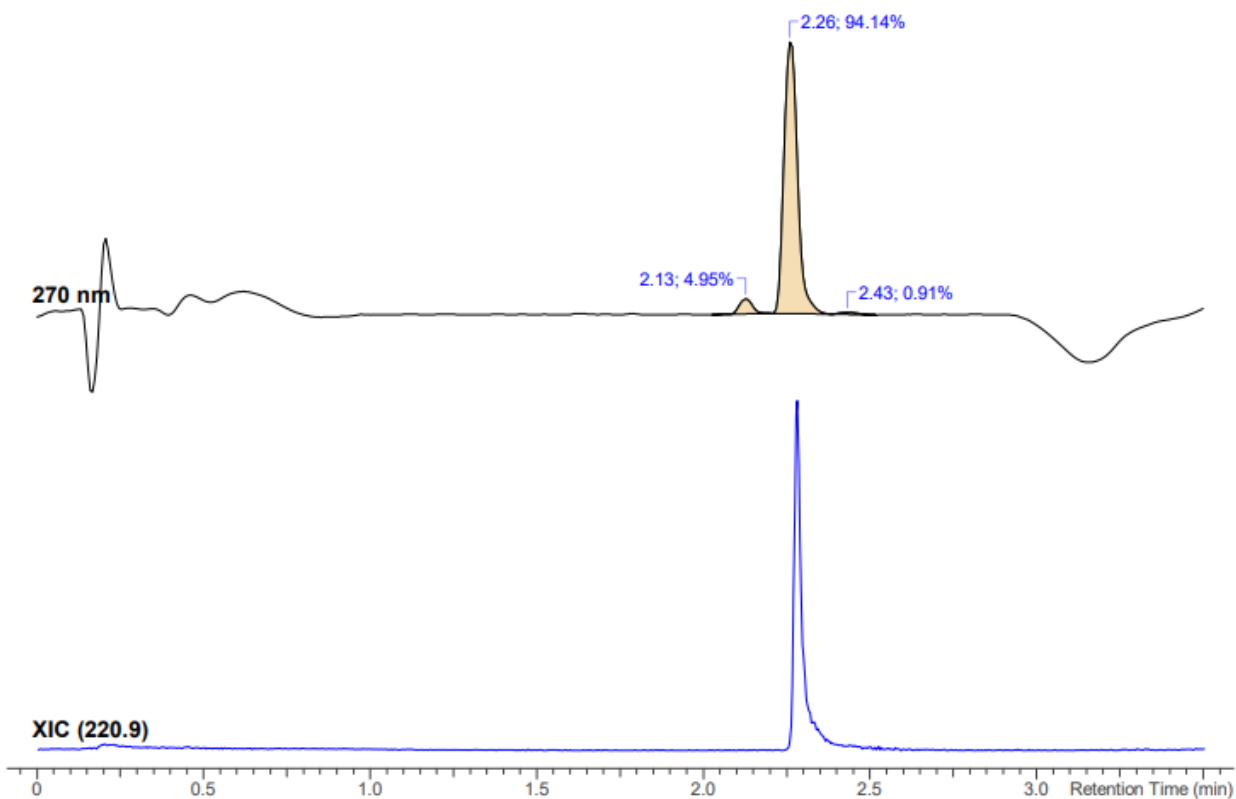

| No. | Peak Name  | tR (min) | Area (%) |
|-----|------------|----------|----------|
| 1   | unknown    | 2.13     | 4.95     |
| 2   | C7H2ClFOS2 | 2.26     | 94.14    |
| 3   | unknown    | 2.43     | 0.91     |



Spectrum from 00110407-5465-004\_2.wiff (sample 1) - 00110407-5465-004, +TOF MS (100 - 2000) from 2.252 to 2.340 min  
 Isotopic Distribution for C7H2ClFOS2 H +

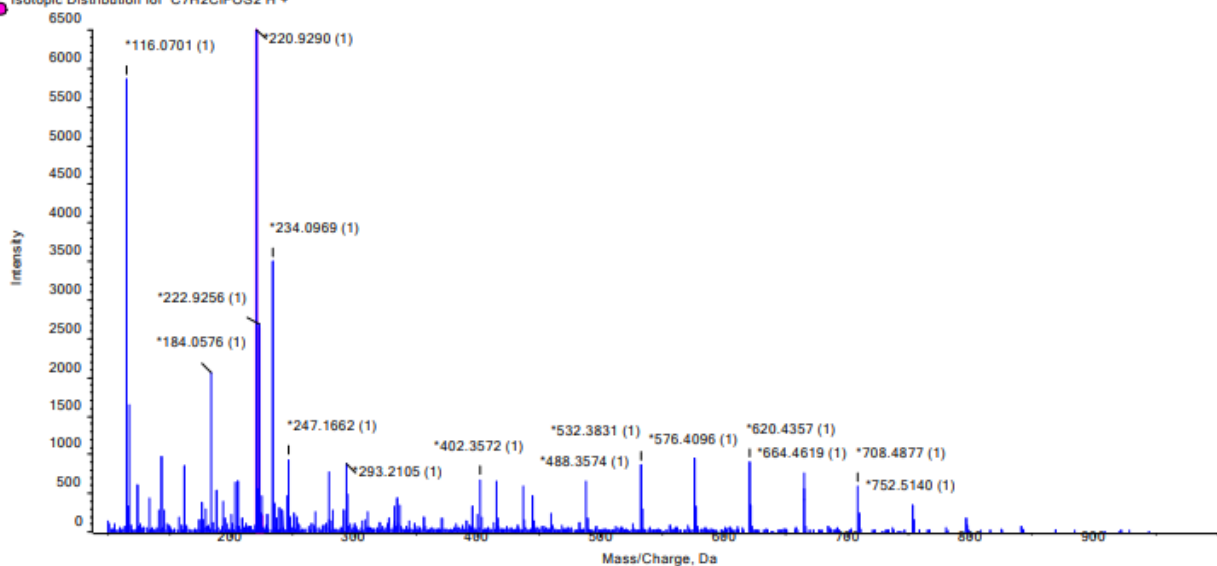

Spectrum from 00110407-5465-004\_2.wiff (sample 1) - 00110407-5465-004, +TOF MS (100 - 2000) from 2.252 to 2.340 min  
 Isotopic Distribution for C7H2ClFOS2 H +

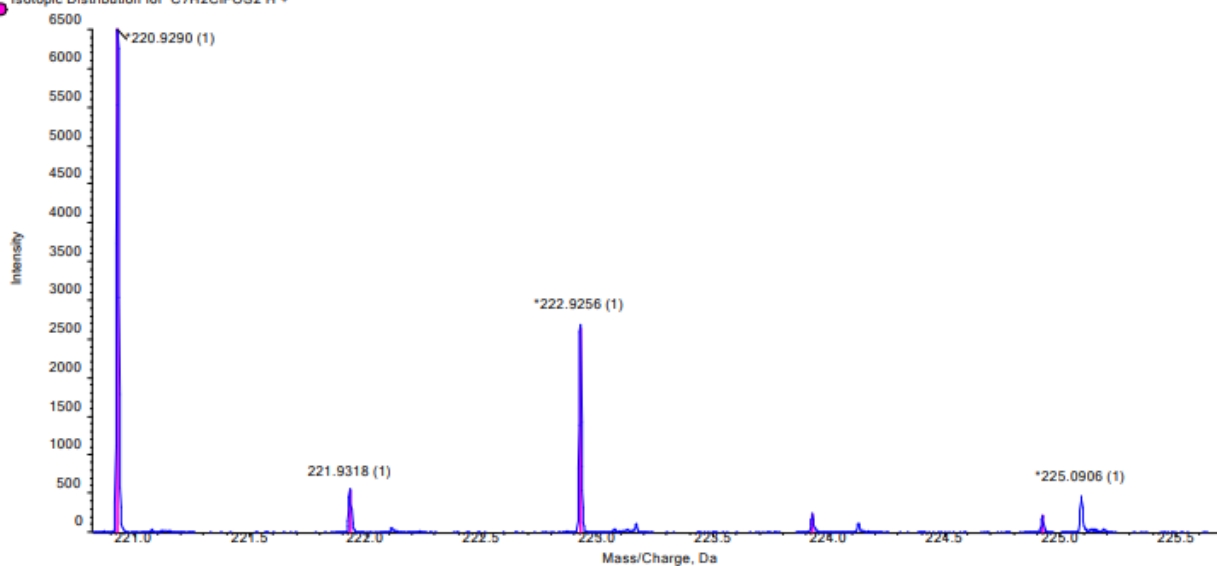

Peak at 2.26 min in UV

| Mass/Charge (Da) | Height | Relative % Height | Compound   | Peak Type          | Theoretical m/z | Error (ppm) | Theoretical m/z | Theoretical Intensity |
|------------------|--------|-------------------|------------|--------------------|-----------------|-------------|-----------------|-----------------------|
| 220.9290         | 6500   | 100.0             | C7H2ClFOS2 | [M+H] <sup>+</sup> | 220.9292        | -1.3        | 220.9292        | 100.0                 |
| 221.9318         | 548    | 8.4               |            |                    |                 |             | 221.9319        | 9.4                   |
| 222.9256         | 2689   | 41.4              |            |                    |                 |             | 222.9261        | 41.4                  |
| 223.9283         | 249    | 3.8               |            |                    |                 |             | 223.9289        | 3.8                   |
| 224.9221         | 209    | 3.2               |            |                    |                 |             | 224.9227        | 3.3                   |

# Supplementary Figure 26. HPLC of compound S8

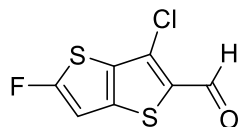

**S8**

```
=====
Acq. Operator   : SYSTEM                               Seq. Line :    4
Sample Operator : SYSTEM                               Location  :    4
Acq. Instrument : LC-325GF                             Inj       :    1
Injection Date  : 3/17/2023 4:26:47 PM                 Inj Volume: 5.000 µl
                                                    Actual Inj Volume : 10.000 µl
Different Inj Volume from Sample Entry!
Sequence File   : C:\Users\Public\Documents\ChemStation\1\Data\DEF_LC_2021 2023-03-17 15-41
                 -03\DEF_LC_2021.S
Method          : C:\Users\Public\Documents\ChemStation\1\Data\DEF_LC_2021 2023-03-17 15-41
                 -03\ACID_CLASSIC.M (Sequence Method)
Last changed    : 6/8/2017 9:26:22 AM by SYSTEM
Method Info     : ACID METHOD for classic look on new Chemstation software
                 Column: XBridge C18 5 micron (4.6 mm x 150 mm)
                 Flow rate: 1.500 mL/min with solvents containing 0.1% TFA
                 0-1.5 min: 5% acetonitrile/water
                 1.5-10 min: 5-100% acetonitrile water
                 10-11 min: 100% acetonitrile
                 11-12.5 min: 100-5% acetonitrile/water
=====
```

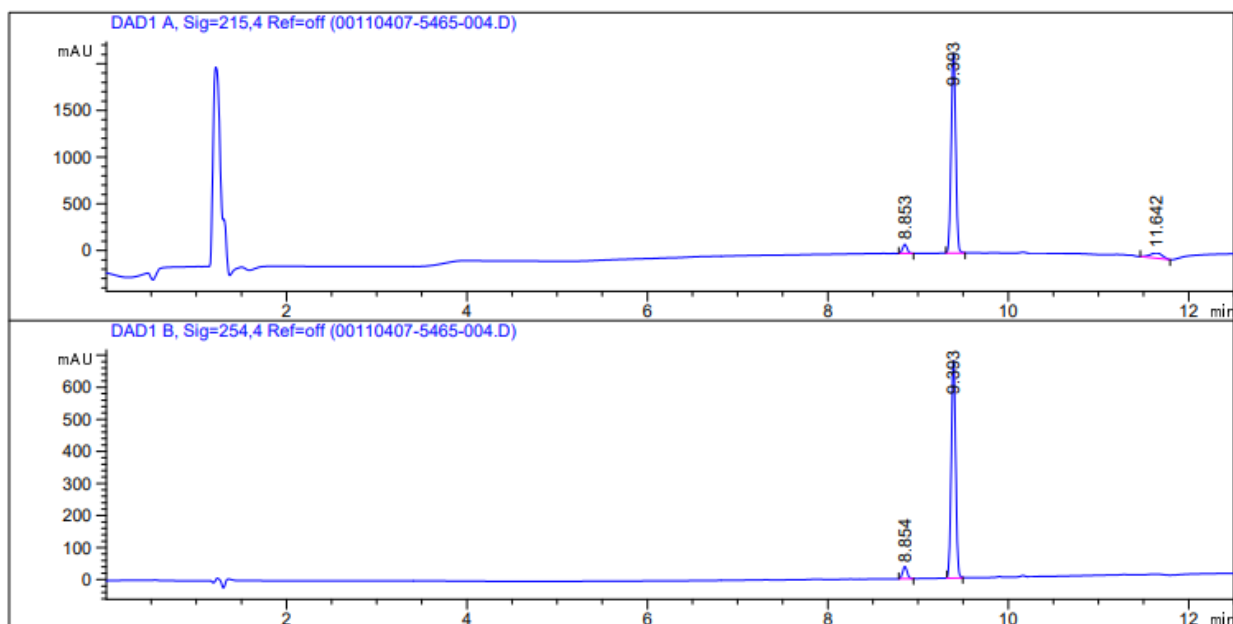

=====  
Area Percent Report  
=====

```
Sorted By      : Signal
Multiplier     : 1.0000
Dilution      : 1.0000
Do not use Multiplier & Dilution Factor with ISTDs
```

Signal 1: DAD1 A, Sig=215,4 Ref=off

| Peak # | RetTime [min] | Type | Width [min] | Area [mAU*s] | Height [mAU] | Area %  |
|--------|---------------|------|-------------|--------------|--------------|---------|
| 1      | 8.853         | BB   | 0.0546      | 337.35281    | 96.83382     | 4.0003  |
| 2      | 9.393         | BB   | 0.0570      | 7575.64990   | 2155.09009   | 89.8311 |
| 3      | 11.642        | BB   | 0.1470      | 520.20831    | 55.69928     | 6.1686  |

Totals : 8433.21103 2307.62319

Signal 2: DAD1 B, Sig=254,4 Ref=off

| Peak # | RetTime [min] | Type | Width [min] | Area [mAU*s] | Height [mAU] | Area %  |
|--------|---------------|------|-------------|--------------|--------------|---------|
| 1      | 8.854         | BB   | 0.0550      | 133.53358    | 38.03883     | 5.4395  |
| 2      | 9.393         | BB   | 0.0538      | 2321.35132   | 680.88263    | 94.5605 |

Totals : 2454.88490 718.92146

=====  
\*\*\* End of Report \*\*\*

# Supplementary Figure 27. LCMS of compound S8

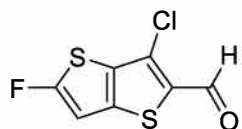

**S8**

MS Ionization : ESI

Instrument & Column: LCMS-AH(4-302) Chromolith. Flash RP-18e 25-2mm

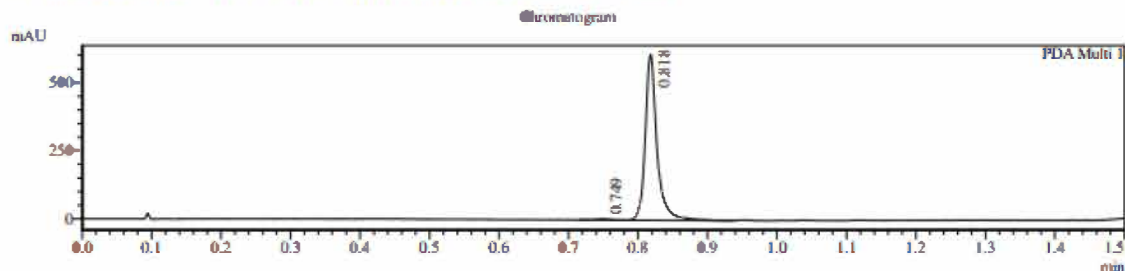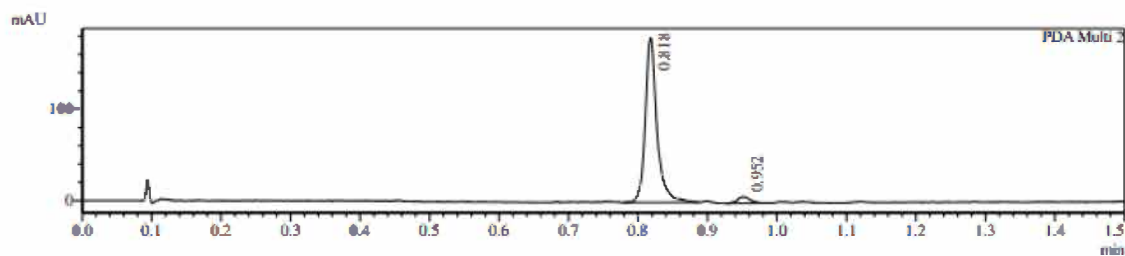

1 PDA Multi 1 / 220nm 4nm

2 PDA Multi 2 / 254nm 4nm

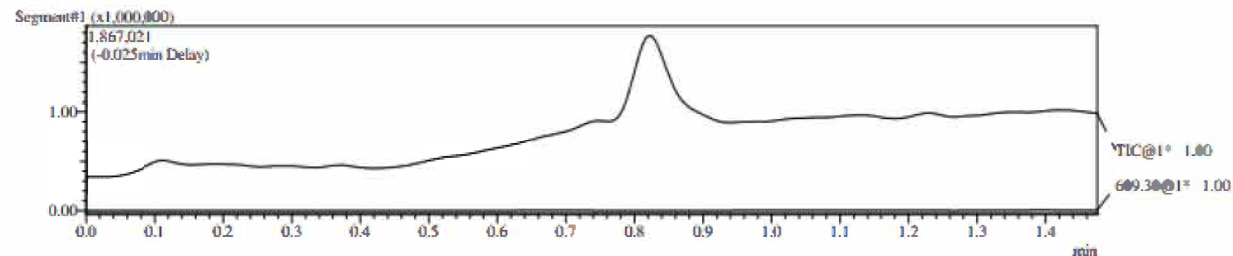

## Integration Result

Ch1 220nm 4nm

| Peak# | Ret. Time | Height | Height % | USP Width | Area   | Area % |
|-------|-----------|--------|----------|-----------|--------|--------|
| 1     | 0.749     | 3232   | 0.538    | 0.030     | 4932   | 0.683  |
| 2     | 0.818     | 597822 | 99.462   | 0.028     | 717323 | 99.317 |

Ch2 254nm 4nm

| Peak# | Ret. Time | Height | Height % | USP Width | Area   | Area % |
|-------|-----------|--------|----------|-----------|--------|--------|
| 1     | 0.818     | 177973 | 96.210   | 0.028     | 210958 | 95.975 |
| 2     | 0.952     | 7011   | 3.790    | 0.030     | 8846   | 4.025  |

MS Spectrum Graph

RetTime: 0.817 DataFile: C:\DATA\1901\190115\00711155-1003-001A.tcd

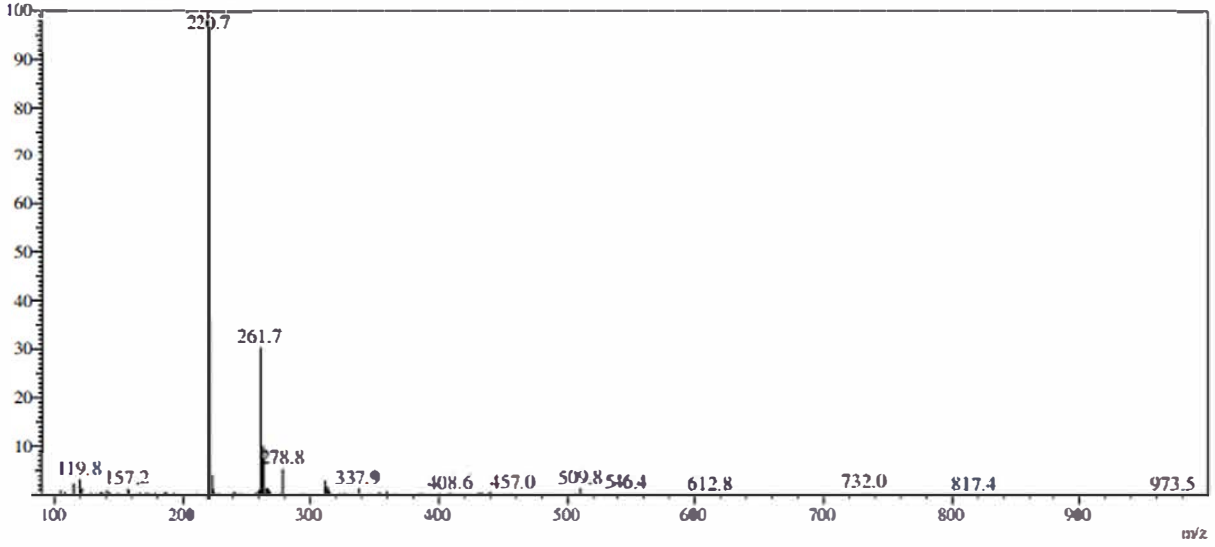

# Supplementary Figure 28. 1H NMR of PF-07208254

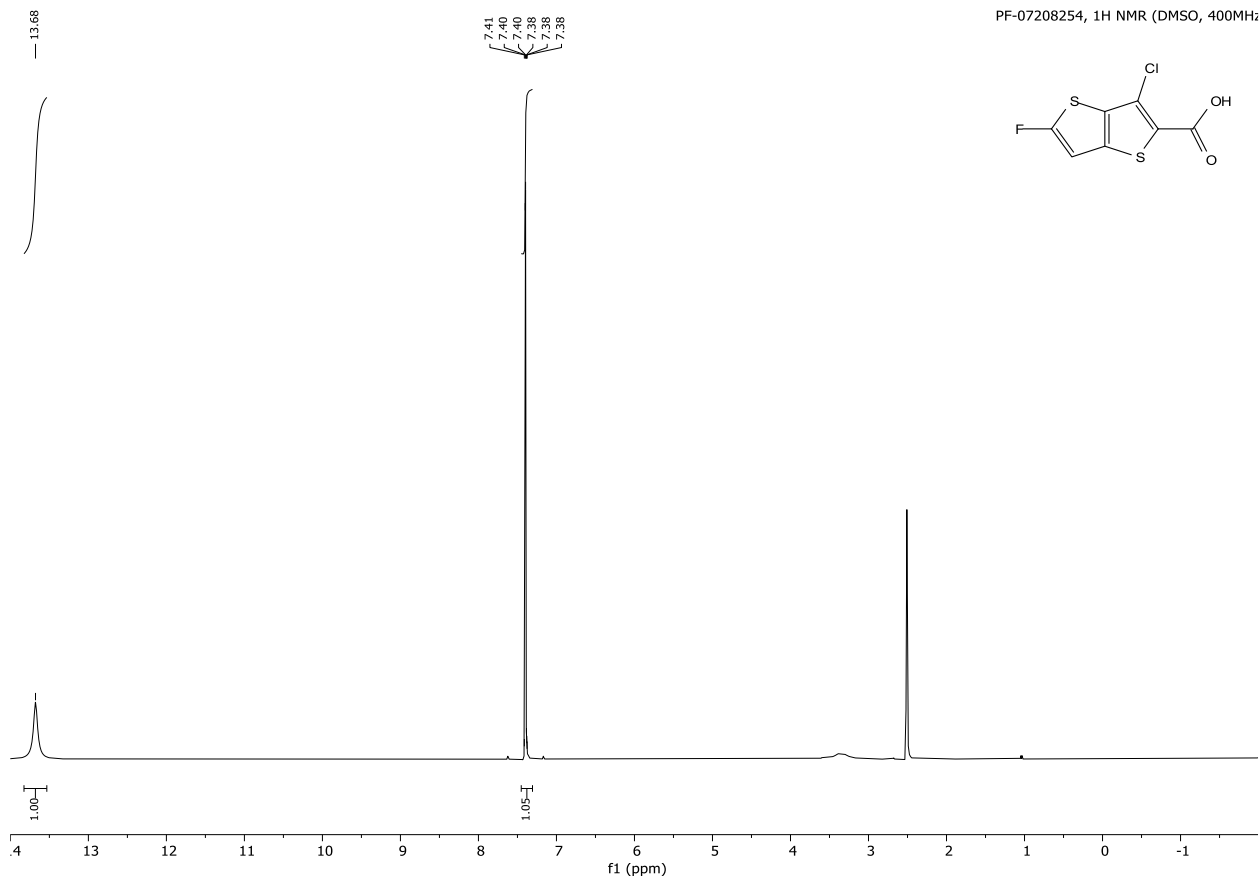

# Supplementary Figure 29. <sup>13</sup>C NMR of PF-07208254

PF-07208254, <sup>13</sup>C NMR (DMSO, 100MHz)

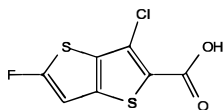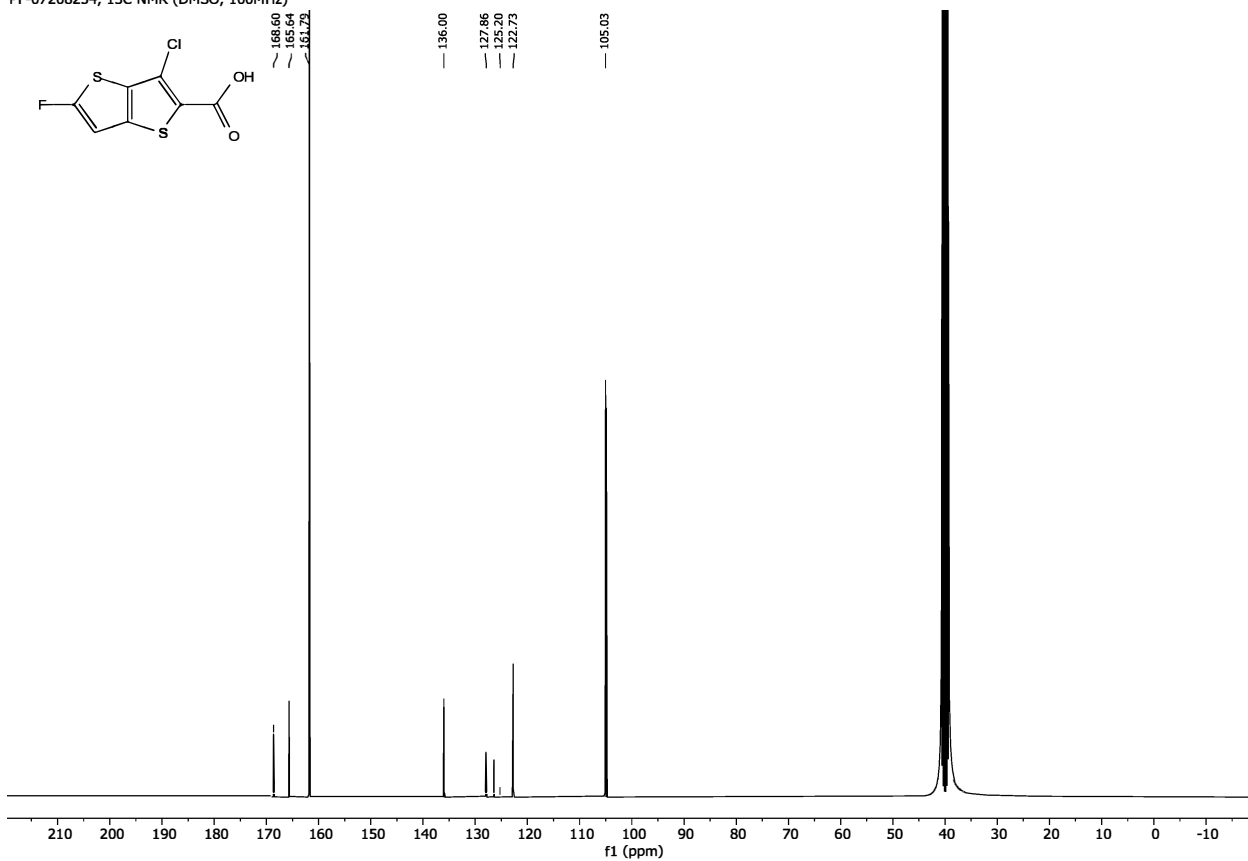

# Supplementary Figure 30. <sup>19</sup>F NMR of PF-07208254

PF-07208254, <sup>19</sup>F NMR (DMSO, 400MHz)

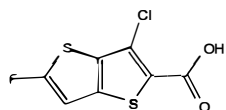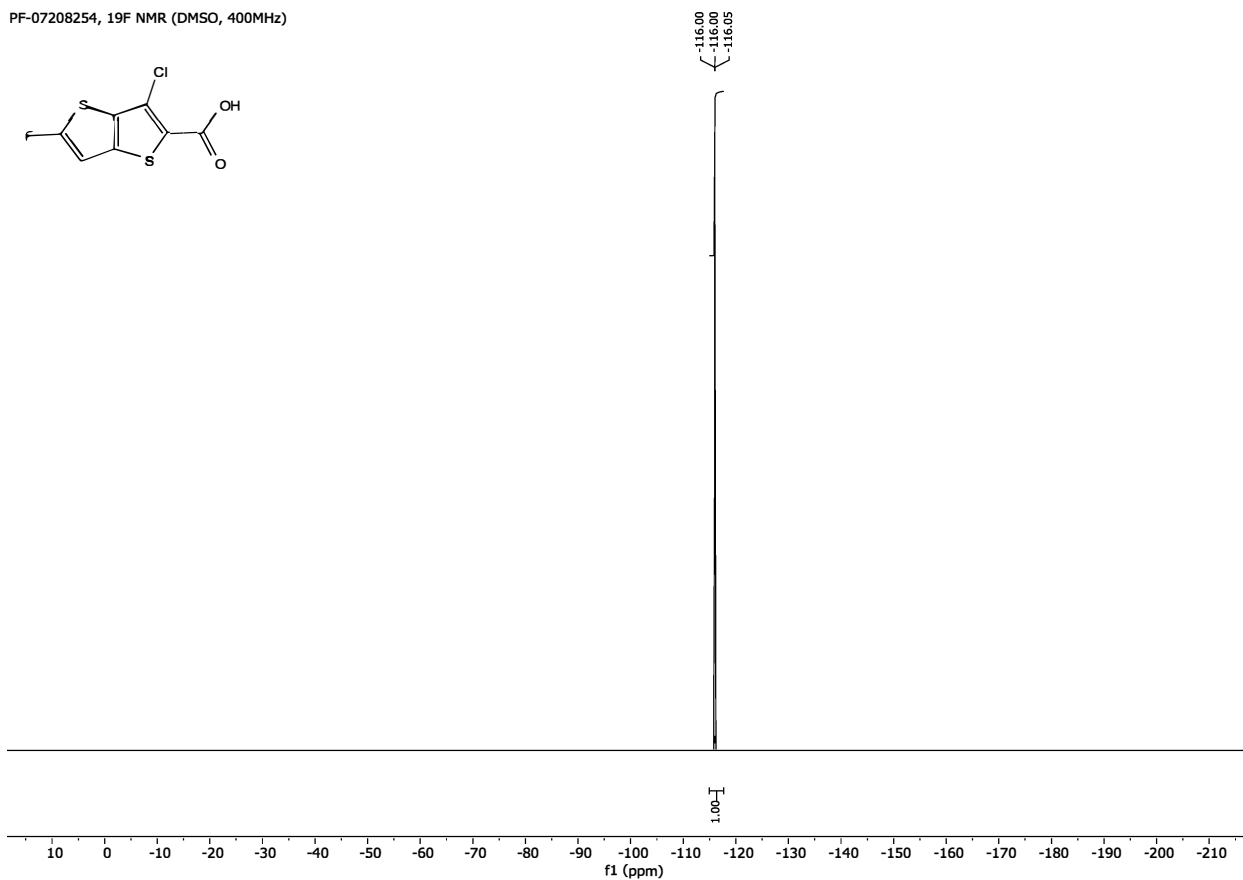



# Supplementary Figure 31. HRMS of PF-07208254

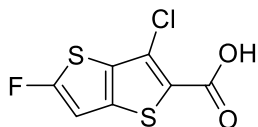

PF-07208254

| Open Access HRMS Sample Report |                         |                    |                            |
|--------------------------------|-------------------------|--------------------|----------------------------|
| Sample ID                      | 00110407-5465-001       | HPLC               | Agilent 1200               |
| Molecular Formula              | C7H2ClFO2S2             | Mass Spectrometer  | Sciex 5600+ QToF           |
| Submittor                      | Martinez Alsina, Luis A | DAD                | 190-400 nm, reported 270nm |
| Run Date                       | 4/4/2023                | MS Scan            | 100-2000 amu               |
| Analyst                        | Quinn, Alandra          | Acquisition Method | HRMS-3min gradient AQ      |
| Analyst's CeN                  | 00714673-0163           | eWB Archive Ref    | 00713459-0292              |

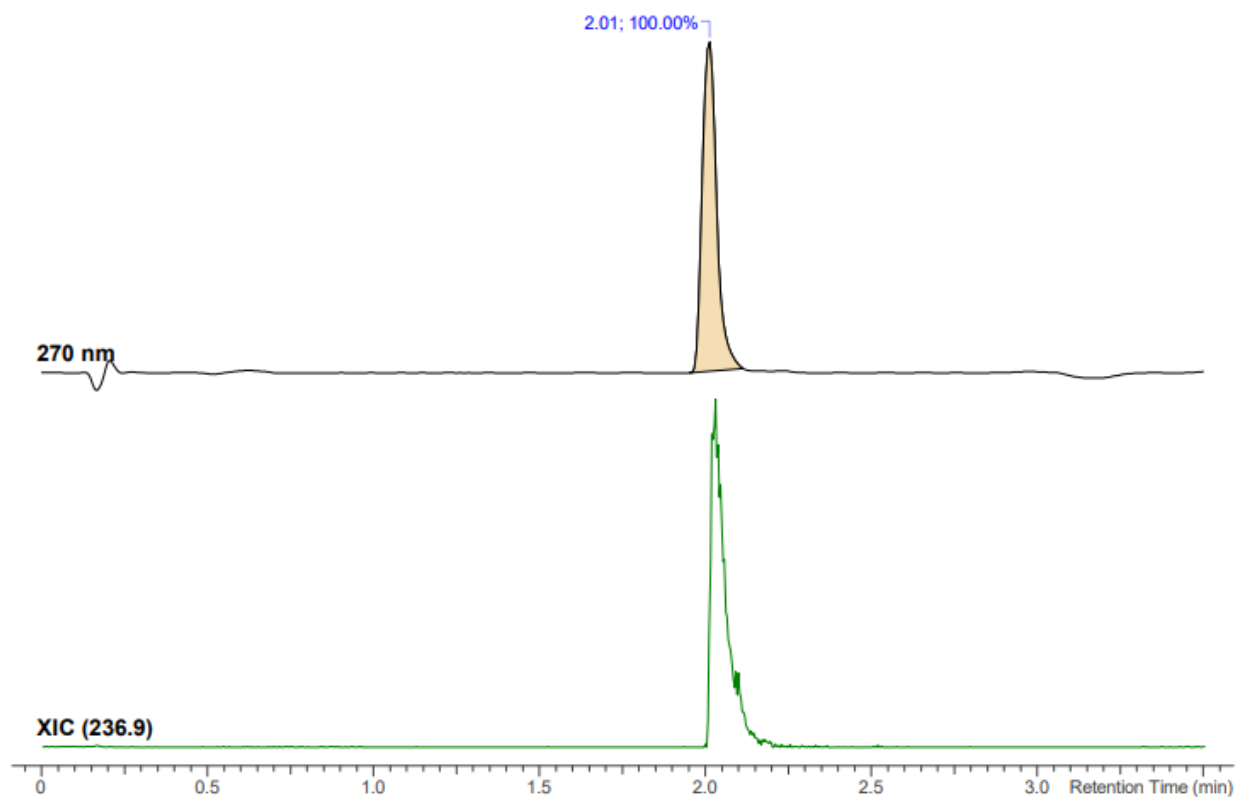

| No. | Peak Name   | tR (min) | Area (%) |
|-----|-------------|----------|----------|
| 1   | C7H2ClFO2S2 | 2.01     | 100.00   |

● Spectrum from 00110407-5465-001\_2.wiff (sample 1) - 00110407-5465-001, +TOF MS (100 - 2000) from 2.012 to 2.096 min  
 ● Isotopic Distribution for C7H2ClFO2S2 H +

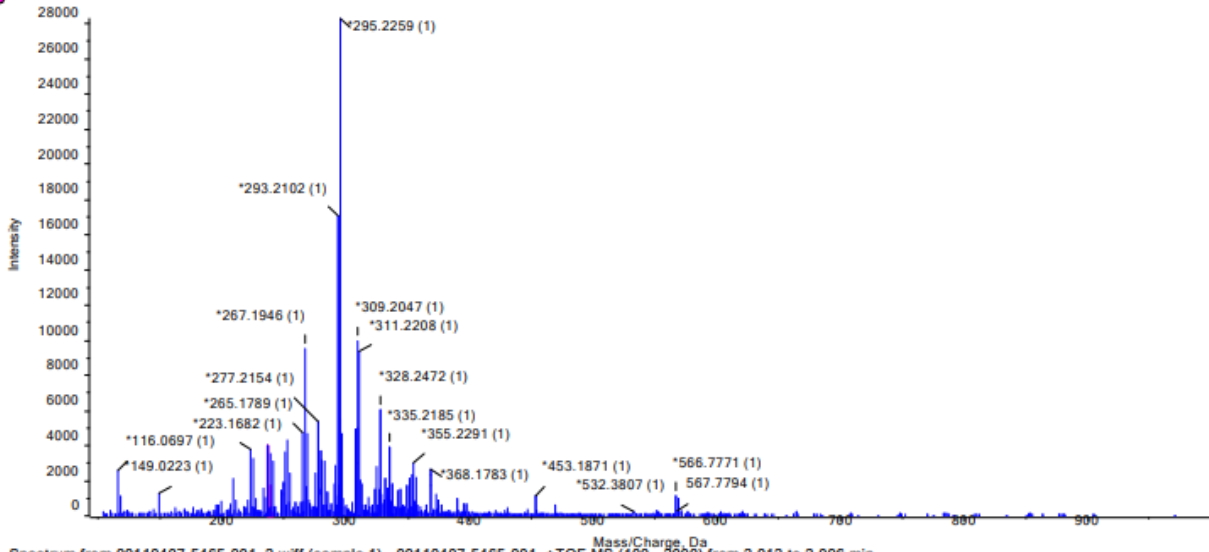

● Spectrum from 00110407-5465-001\_2.wiff (sample 1) - 00110407-5465-001, +TOF MS (100 - 2000) from 2.012 to 2.096 min  
 ● Isotopic Distribution for C7H2ClFO2S2 H +

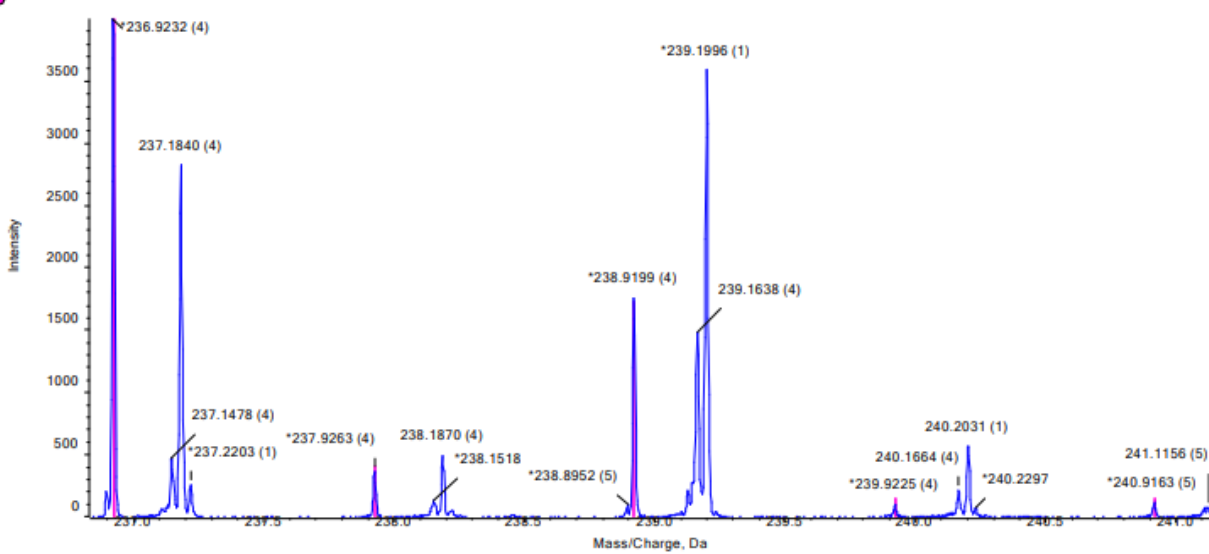

| Peak at 2.01 min in UV |        |                   |             |                    |                 |             |                 |                       |
|------------------------|--------|-------------------|-------------|--------------------|-----------------|-------------|-----------------|-----------------------|
| Mass/Charge (Da)       | Height | Relative % Height | Compound    | Peak Type          | Theoretical m/z | Error (ppm) | Theoretical m/z | Theoretical Intensity |
| 236.9232               | 3998   | 100.0             | C7H2ClFO2S2 | [M+H] <sup>+</sup> | 236.9242        | -4.1        | 236.9242        | 100.0                 |
| 237.9263               | 367    | 9.2               |             |                    |                 |             | 237.9269        | 9.5                   |
| 238.9199               | 1760   | 44.0              |             |                    |                 |             | 238.9211        | 41.6                  |
| 239.9225               | 99     | 2.5               |             |                    |                 |             | 239.9238        | 3.8                   |
| 240.9163               | 116    | 2.9               |             |                    |                 |             | 240.9178        | 3.4                   |
|                        |        |                   |             |                    |                 |             |                 |                       |

# Supplementary Figure 32. HPLC of PF-07208254



PF-07208254

connecting discovery to pharm sci

| SAMPLE INFORMATION |                             |                    |                           |
|--------------------|-----------------------------|--------------------|---------------------------|
| Sample Name:       | PF-07208254-00-0026         | Acquired By:       | LiC03                     |
| Vial:              | 1:A,2                       | Date Acquired:     | 14-Feb-20 12:40:27 PM EST |
| Injection #:       | 1                           | Acq. Method Set:   | GRO343M3_10pt3_MSA_RP18   |
| Injection Volume:  | 1.00 ul                     | Date Processed:    | 14-Feb-20 1:40:28 PM EST  |
| Run Time:          | 10.3 Minutes                | Processing Method: | GRO343_UPLC_PM            |
| Sample Set Name:   | GRO343_CL_ETS 02142020 Run1 | Channel Name:      | PDA 210 nm                |

Auto-Scaled Chromatogram

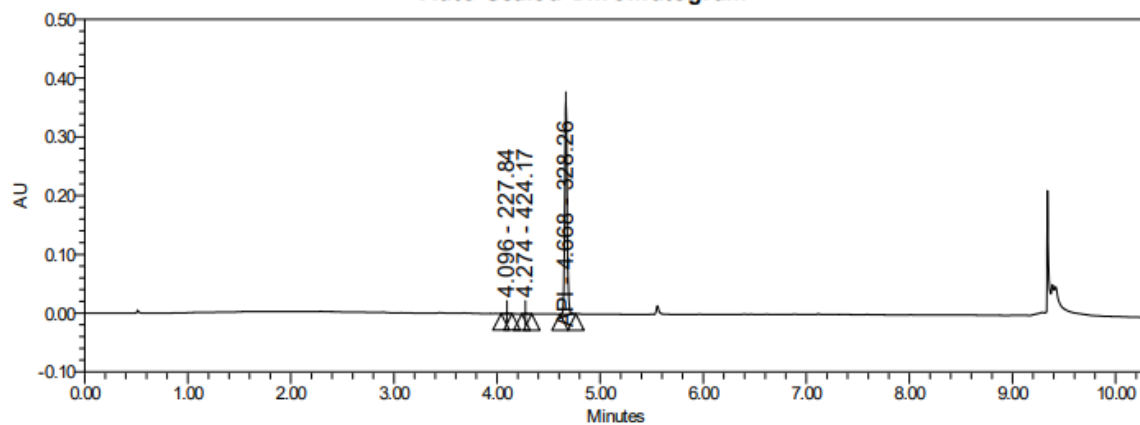

Sample Name PF-07208254-00-0026; Vial 1:A,2; Injection 1; Channel PDA Ch1 210nm@4.8nm; Date Acquired 14-Feb-20 12:40:27 PM EST

Zoomed Chromatogram

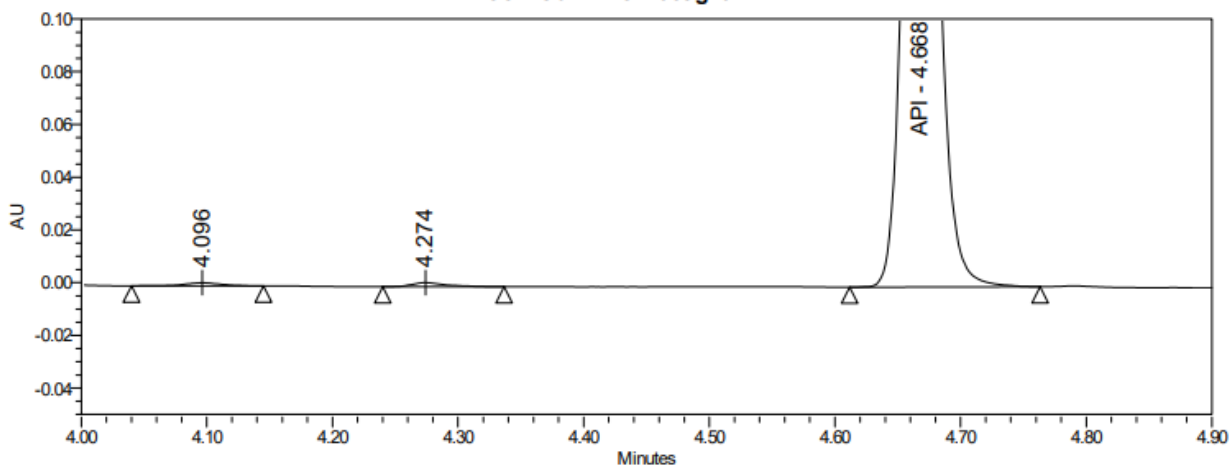

## SAMPLE INFORMATION

---

|                   |                             |                    |                           |
|-------------------|-----------------------------|--------------------|---------------------------|
| Sample Name:      | PF-07208254-00-0026         | Acquired By:       | LiC03                     |
| Vial:             | 1:A,2                       | Date Acquired:     | 14-Feb-20 12:40:27 PM EST |
| Injection #:      | 1                           | Acq. Method Set:   | GRO343M3_10pt3_MSA_RP18   |
| Injection Volume: | 1.00 ul                     | Date Processed:    | 14-Feb-20 1:40:28 PM EST  |
| Run Time:         | 10.3 Minutes                | Processing Method: | GRO343_UPLC_PM            |
| Sample Set Name:  | GRO343_CL_ETS 02142020 Run1 | Channel Name:      | PDA 210 nm                |

### Area % Results

Result Id 95855

#### Peak Results

|   | PeakName | RT    | Area   | % Area | Height | USP Tailing | s/n | USP s/n | USP Resolution |
|---|----------|-------|--------|--------|--------|-------------|-----|---------|----------------|
| 1 |          | 4.096 | 2416   | 0.41   | 1201   |             |     |         |                |
| 2 |          | 4.274 | 2938   | 0.50   | 1560   |             |     |         |                |
| 3 | API      | 4.668 | 582040 | 99.09  | 360389 |             |     |         |                |

# Supplementary Figure 33. 1H NMR of compound S9

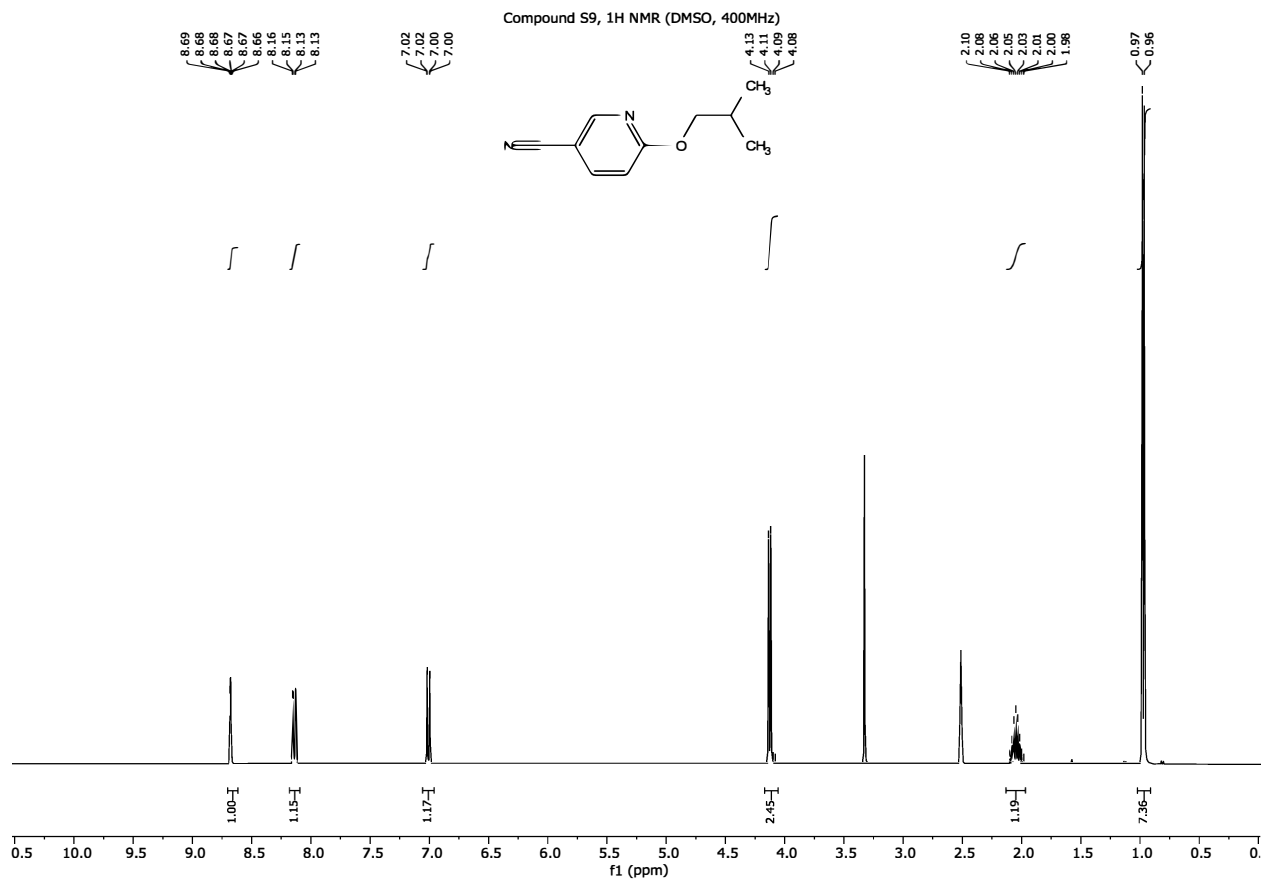

# Supplementary Figure 34. <sup>13</sup>C NMR of compound S9

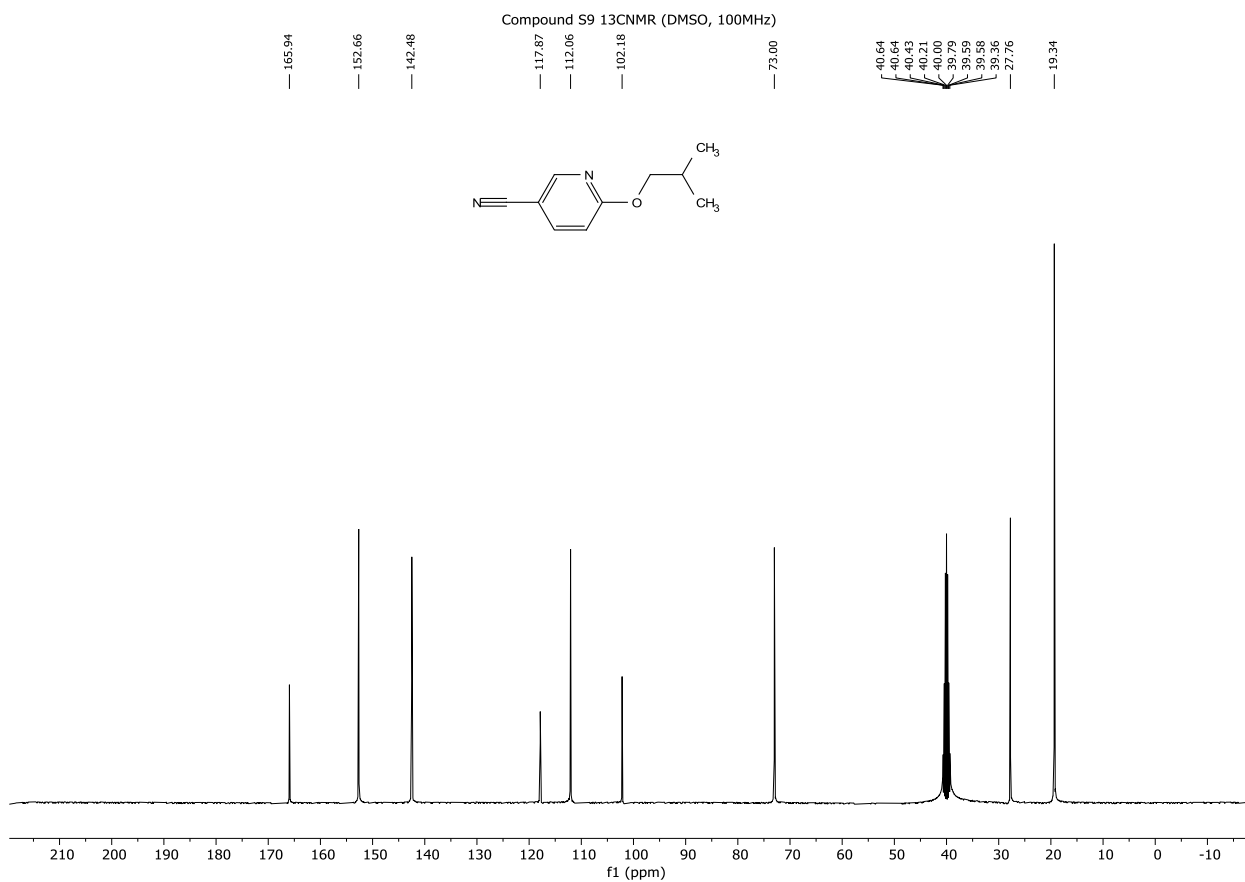

# Supplementary Figure 35. HRMS of compound S9

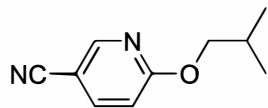

**S9**

| Open Access HRMS Sample Report |                   |                    |                            |
|--------------------------------|-------------------|--------------------|----------------------------|
| Sample ID                      | 00110580-3414-006 | HPLC               | Agilent 1200               |
| Molecular Formula              | C10H12N2O         | Mass Spectrometer  | Sciex 5600+ QToF           |
| Submittor                      | Martinez, Luis    | DAD                | 190-400 nm, reported 270nm |
| Run Date                       | 4/27/2023         | MS Scan            | 100-2000 amu               |
| Analyst                        | Quinn, Alandra    | Acquisition Method | HRMS-3min gradient AQ      |
| Analyst's CeN                  | 00714673-0166     | eWB Archive Ref    | 00713459-0294              |

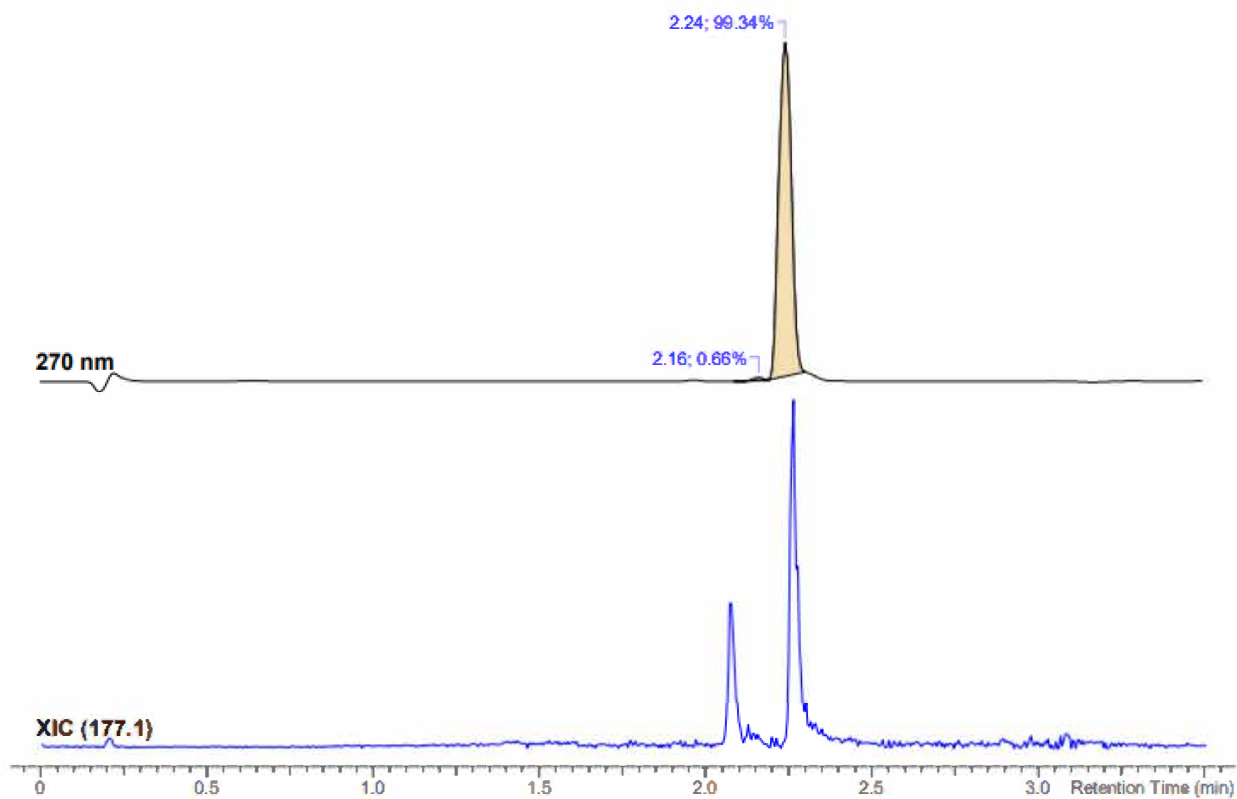

| No. | Peak Name | tR (min) | Area (%) |
|-----|-----------|----------|----------|
| 1   | unknown   | 2.16     | 0.66     |
| 2   | C10H12N2O | 2.24     | 99.34    |

Spectrum from 00110580-3414-006\_5.wiff (sample 1) - C10H12N2O, +TOF MS (100 - 2000) from 2.241 to 2.306 min  
 Isotopic Distribution for C10H12N2O H +

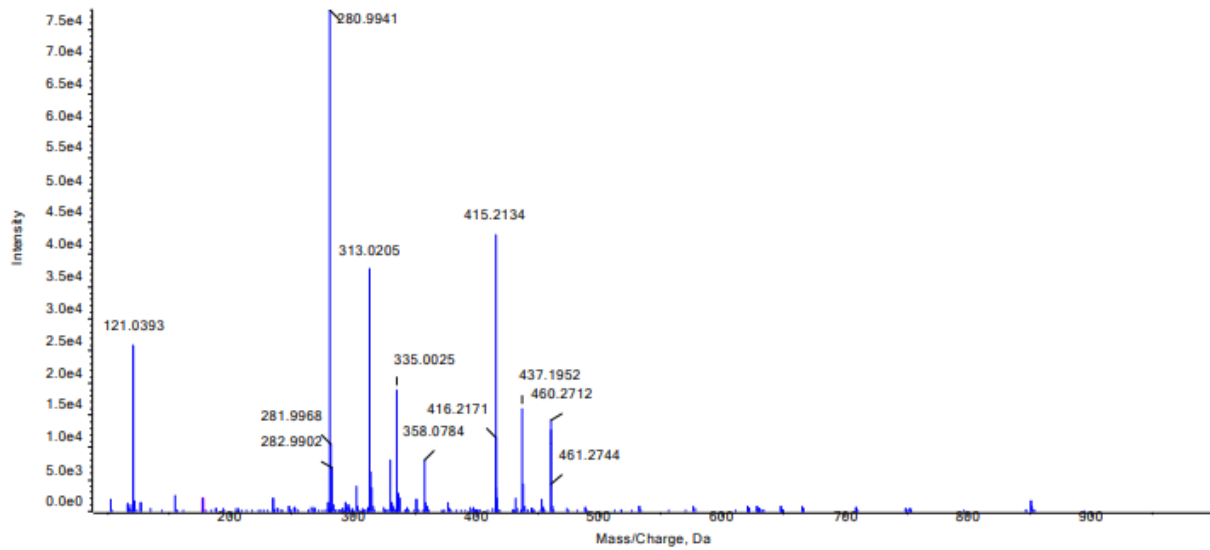

Spectrum from 00110580-3414-006\_5.wiff (sample 1) - C10H12N2O, +TOF MS (100 - 2000) from 2.241 to 2.306 min  
 Isotopic Distribution for C10H12N2O H +

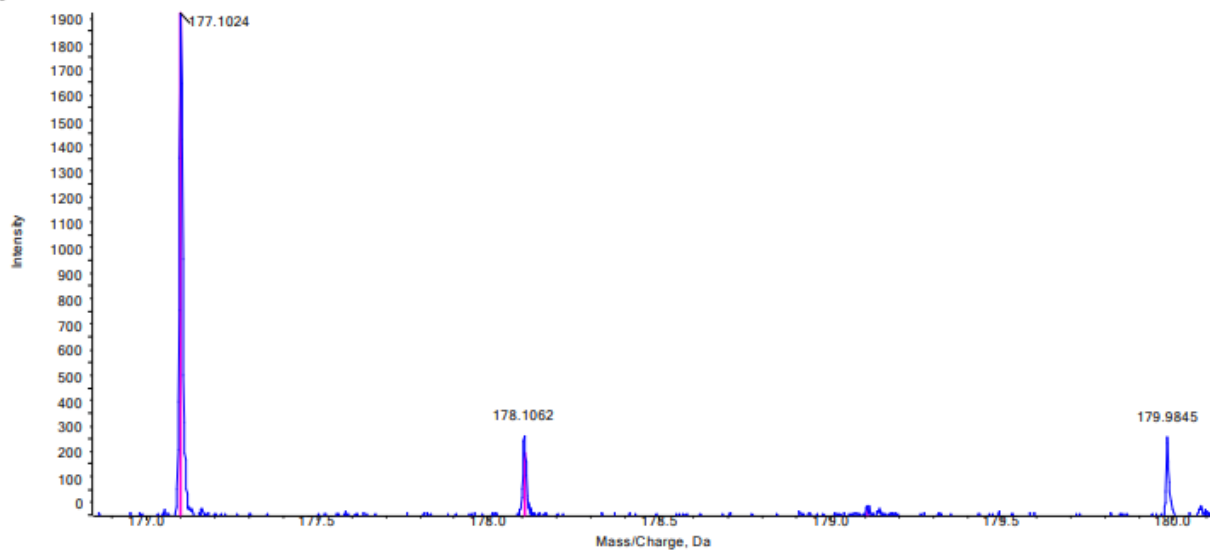

| Peak at 2.24 min in UV |        |                   |           |                    |                 |             |                 |                       |
|------------------------|--------|-------------------|-----------|--------------------|-----------------|-------------|-----------------|-----------------------|
| Mass/Charge (Da)       | Height | Relative % Height | Compound  | Peak Type          | Theoretical m/z | Error (ppm) | Theoretical m/z | Theoretical Intensity |
| 177.1024               | 1969   | 100.0             | C10H12N2O | [M+H] <sup>+</sup> | 177.1022        | 0.8         | 177.1022        | 100.0                 |
| 178.1062               | 310    | 15.8              |           |                    |                 |             | 178.1052        | 12.0                  |
| 179.1076               | 39     | 2.0               |           |                    |                 |             | 179.1078        | 0.9                   |





=====  
 Area Percent Report  
 =====

Sorted By : Signal  
 Multiplier : 1.0000  
 Dilution : 1.0000  
 Do not use Multiplier & Dilution Factor with ISTDs

Signal 1: DAD1 A, Sig=210,4 Ref=off

| Peak # | RetTime [min] | Type | Width [min] | Area [mAU*s] | Height [mAU] | Area %   |
|--------|---------------|------|-------------|--------------|--------------|----------|
| 1      | 8.798         | BB   | 0.0561      | 1291.38745   | 357.88132    | 100.0000 |

Totals : 1291.38745 357.88132

Signal 2: DAD1 B, Sig=254,4 Ref=off

| Peak # | RetTime [min] | Type | Width [min] | Area [mAU*s] | Height [mAU] | Area %   |
|--------|---------------|------|-------------|--------------|--------------|----------|
| 1      | 8.798         | BB   | 0.0558      | 5101.04199   | 1424.99304   | 100.0000 |

Totals : 5101.04199 1424.99304

Signal 3: DAD1 C, Sig=280,4 Ref=off

| Peak # | RetTime [min] | Type | Width [min] | Area [mAU*s] | Height [mAU] | Area %   |
|--------|---------------|------|-------------|--------------|--------------|----------|
| 1      | 8.798         | BB   | 0.0553      | 2957.12744   | 835.37280    | 100.0000 |

Totals : 2957.12744 835.37280

=====  
 \*\*\* End of Report \*\*\*

# Supplementary Figure 37. 1H NMR of compound S10

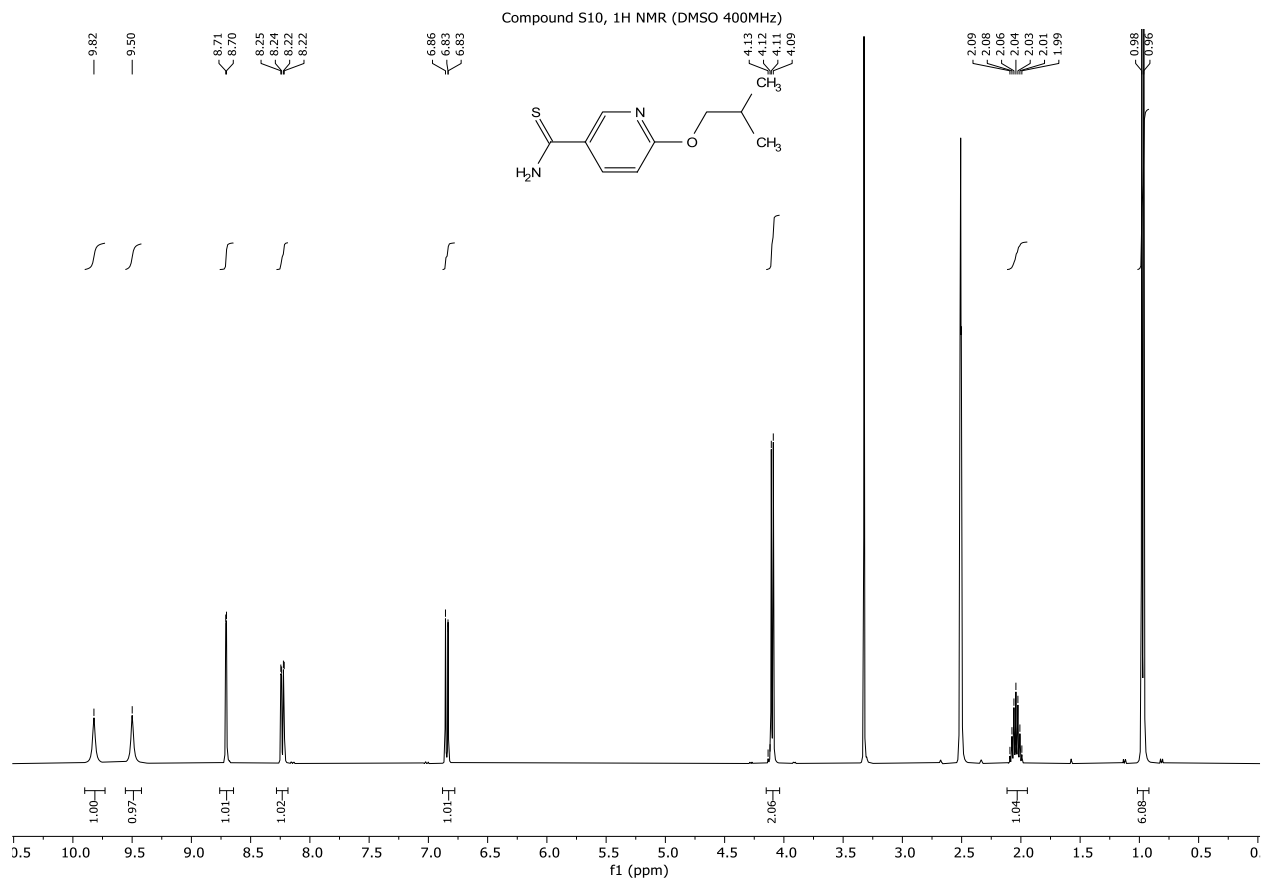

# Supplementary Figure 38. <sup>13</sup>C NMR of compound S10

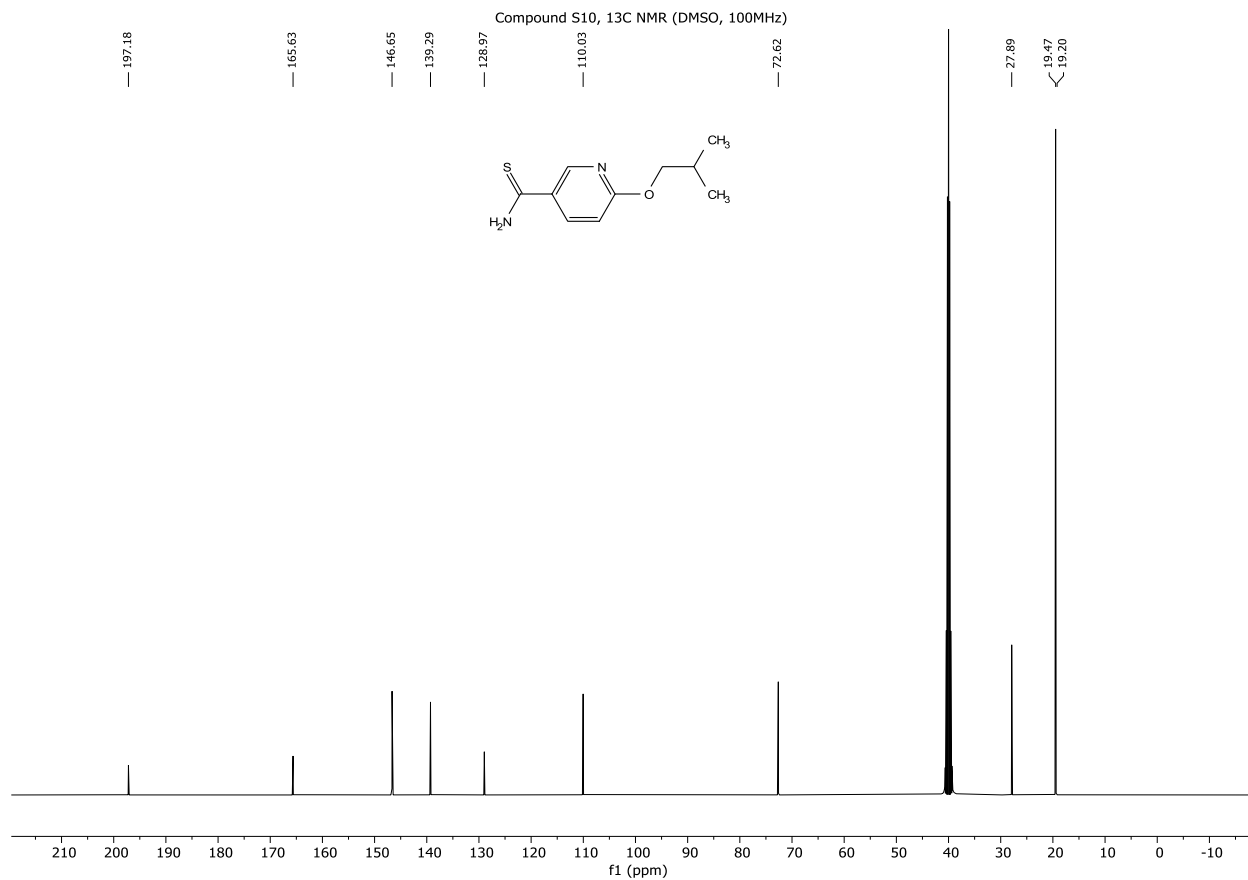

# Supplementary Figure 39. HRMS of compound S10

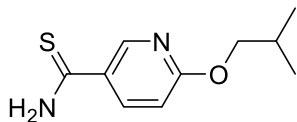

**S10**

## Open Access HRMS Sample Report

|                   |                   |                    |                            |
|-------------------|-------------------|--------------------|----------------------------|
| Sample ID         | 00110512-3609-003 | HPLC               | Agilent 1200               |
| Molecular Formula | C10H14N2OS        | Mass Spectrometer  | Sciex 5600+ QToF           |
| Submittor         | Martinez, Luis    | DAD                | 190-400 nm, reported 270nm |
| Run Date          | 4/27/2023         | MS Scan            | 100-2000 amu               |
| Analyst           | Quinn, Alandra    | Acquisition Method | HRMS-3min gradient AQ      |
| Analyst's CeN     | 00714673-0166     | eWB Archive Ref    | 00713459-0294              |

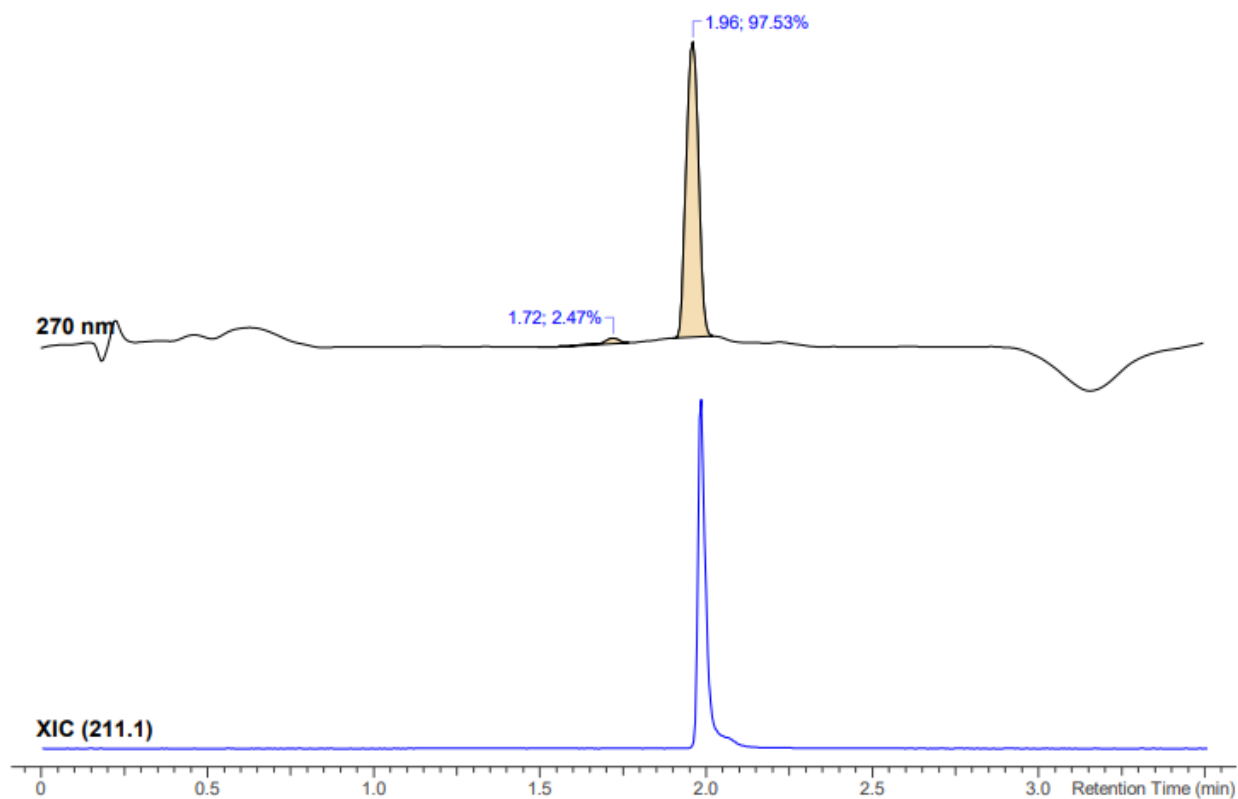

| No. | Peak Name  | tR (min) | Area (%) |
|-----|------------|----------|----------|
| 1   | unknown    | 1.72     | 2.47     |
| 2   | C10H14N2OS | 1.96     | 97.53    |

● Spectrum from 00110512-3609-003.wiff (sample 1) - C<sub>10</sub>H<sub>14</sub>N<sub>2</sub>O<sub>5</sub>, +TOF MS (100 - 2000) from 1.934 to 2.027 min  
 ● Isotopic Distribution for C<sub>10</sub>H<sub>14</sub>N<sub>2</sub>O<sub>5</sub> H<sup>+</sup>

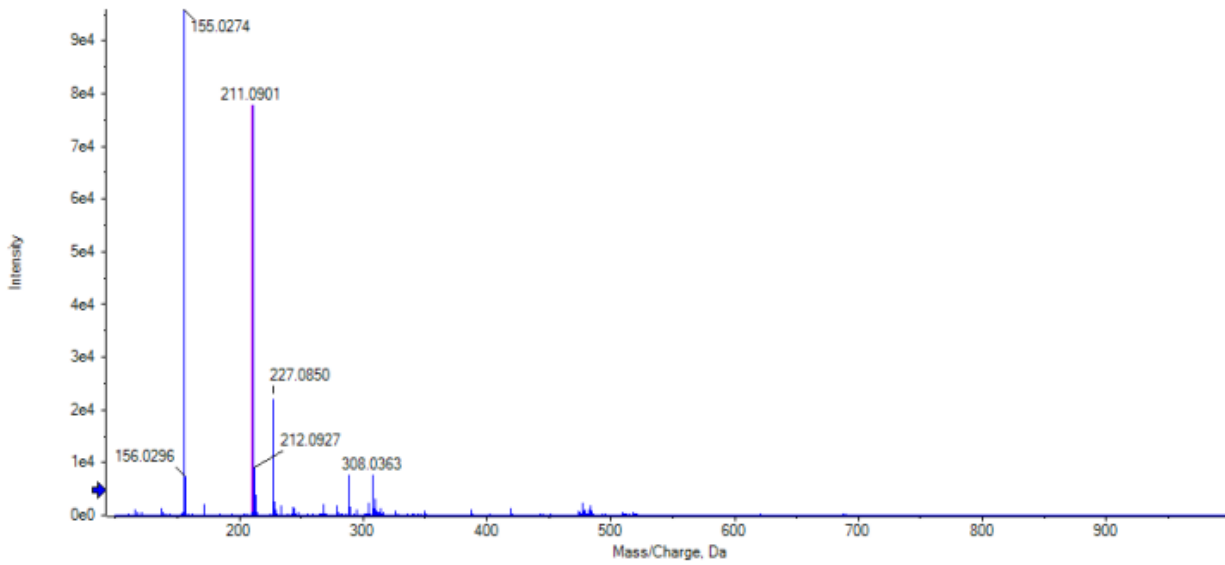

● Spectrum from 00110512-3609-003.wiff (sample 1) - C<sub>10</sub>H<sub>14</sub>N<sub>2</sub>O<sub>5</sub>, +TOF MS (100 - 2000) from 1.934 to 2.027 min  
 ● Isotopic Distribution for C<sub>10</sub>H<sub>14</sub>N<sub>2</sub>O<sub>5</sub> H<sup>+</sup>

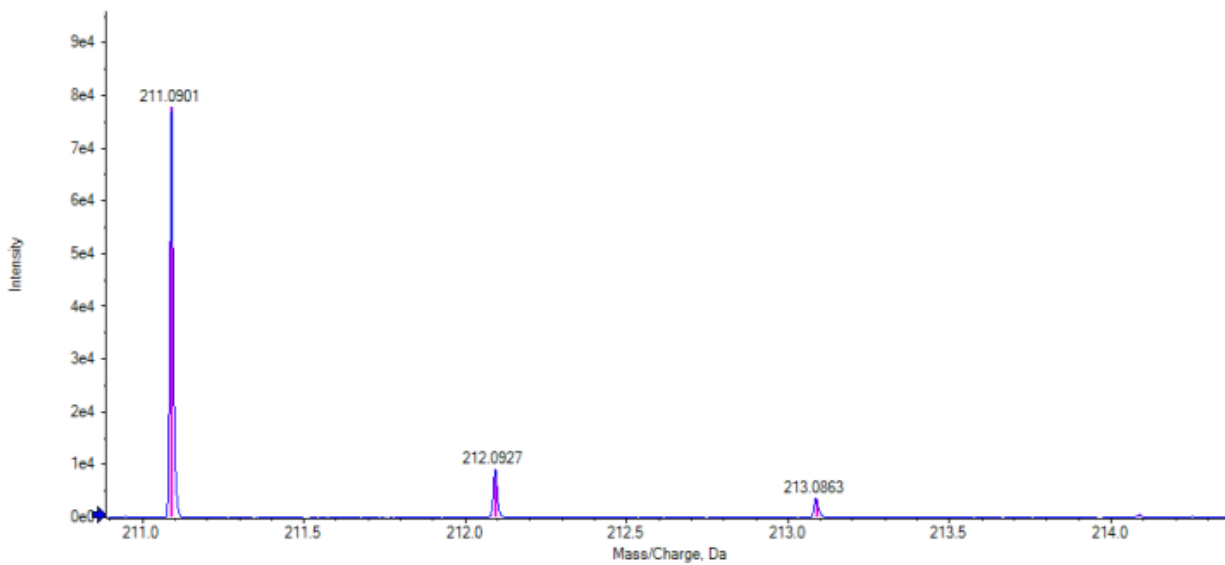

| Peak at 1.96 min in UV |        |                   |                                                               |                    |                 |             |                 |                       |
|------------------------|--------|-------------------|---------------------------------------------------------------|--------------------|-----------------|-------------|-----------------|-----------------------|
| Mass/Charge (Da)       | Height | Relative % Height | Compound                                                      | Peak Type          | Theoretical m/z | Error (ppm) | Theoretical m/z | Theoretical Intensity |
| 211.0901               | 77845  | 100.0             | C <sub>10</sub> H <sub>14</sub> N <sub>2</sub> O <sub>5</sub> | [M+H] <sup>+</sup> | 211.0900        | 0.5         | 211.0900        | 100.0                 |
| 212.0927               | 9088   | 11.7              |                                                               |                    |                 |             | 212.0927        | 12.8                  |
| 213.0863               | 3722   | 4.8               |                                                               |                    |                 |             | 213.0874        | 5.4                   |
| 214.0889               | 532    | 0.7               |                                                               |                    |                 |             | 214.0896        | 0.6                   |



=====  
 Area Percent Report  
 =====

Sorted By : Signal  
 Multiplier : 1.0000  
 Dilution : 1.0000  
 Do not use Multiplier & Dilution Factor with ISTDs

Signal 1: DAD1 A, Sig=210,4 Ref=off

| Peak # | RetTime [min] | Type | Width [min] | Area [mAU*s] | Height [mAU] | Area %   |
|--------|---------------|------|-------------|--------------|--------------|----------|
| 1      | 7.421         | BB   | 0.0652      | 1861.47400   | 441.43124    | 100.0000 |

Totals : 1861.47400 441.43124

Signal 2: DAD1 B, Sig=254,4 Ref=off

| Peak # | RetTime [min] | Type | Width [min] | Area [mAU*s] | Height [mAU] | Area %   |
|--------|---------------|------|-------------|--------------|--------------|----------|
| 1      | 7.421         | BB   | 0.0650      | 1249.24487   | 297.22464    | 100.0000 |

Totals : 1249.24487 297.22464

Signal 3: DAD1 C, Sig=280,4 Ref=off

| Peak # | RetTime [min] | Type | Width [min] | Area [mAU*s] | Height [mAU] | Area %   |
|--------|---------------|------|-------------|--------------|--------------|----------|
| 1      | 7.421         | BB   | 0.0650      | 1533.97607   | 365.13541    | 100.0000 |

Totals : 1533.97607 365.13541

=====  
 \*\*\* End of Report \*\*\*



# Supplementary Figure 41. 1H NMR of compound S11

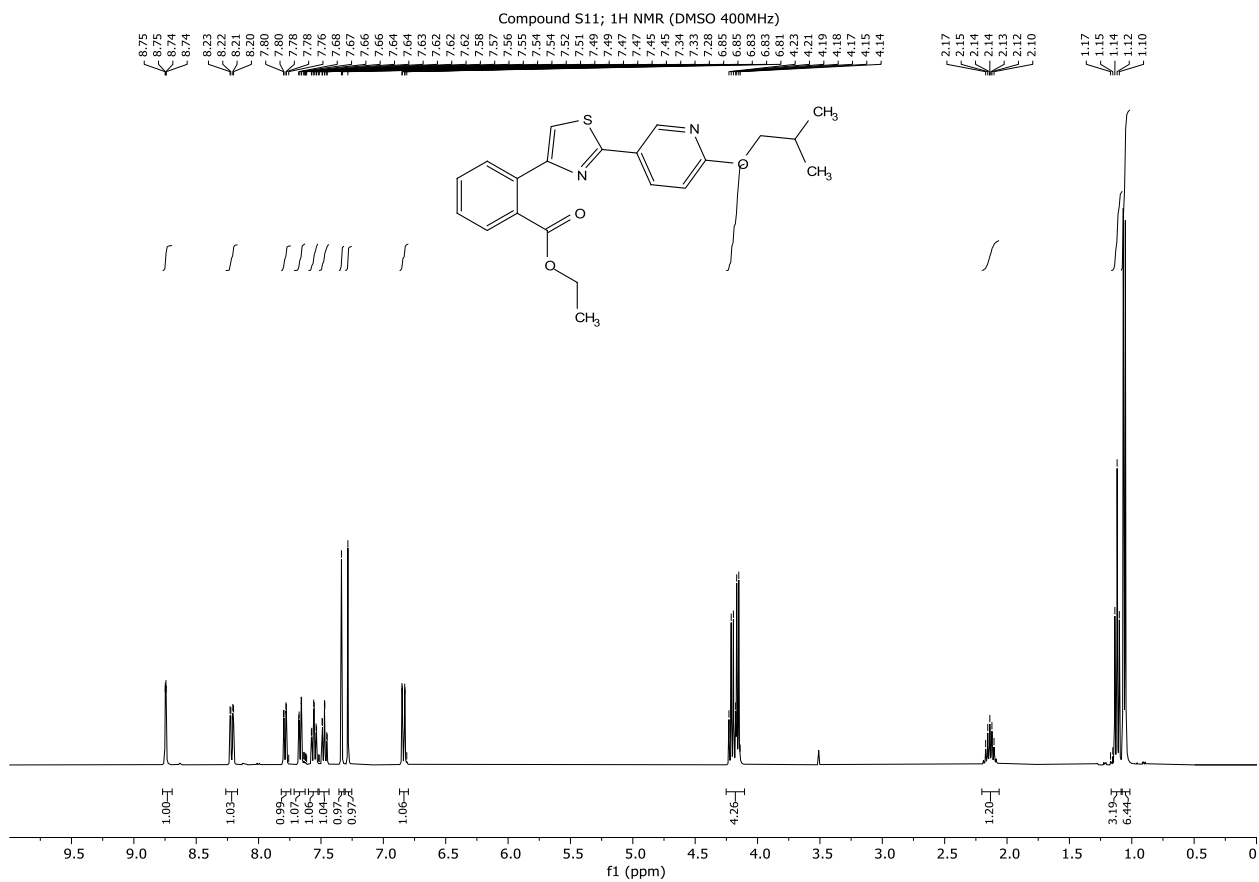

# Supplementary Figure 42. HPLC of compound S11

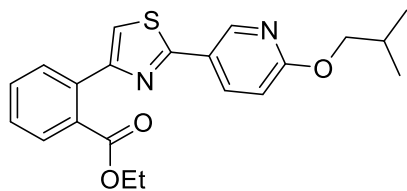

**S11**

```
=====
Acq. Operator   : SYSTEM                      Seq. Line :    3
Acq. Instrument : LC-235GC                   Location  :    2
Injection Date  : 3/25/2019 6:52:20 AM      Inj       :    1
                                           Inj Volume: 5.0 µl
Different Inj Volume from Sample Entry! Actual Inj Volume : 10.0 µl
Sequence File   : C:\Chem32\1\Data\THERMO\TEST 2019-03-25 06-23-17\TEST.S
Method          : C:\Chem32\1\Data\THERMO\TEST 2019-03-25 06-23-17\ACID_CLASSIC.M (Sequence
Method)
Last changed    : 3/25/2019 6:23:18 AM by SYSTEM
Method Info     : ACID METHOD for classic look on new Chemstation software
                  Column: XBridge C18 5 micron (4.6 mm x 150 mm)
                  Flow rate: 1.500 mL/min with solvents containing 0.1% TFA
                  0-1.5 min: 5% acetonitrile/water
                  1.5-10 min: 5-100% acetonitrile water
                  10-11 min: 100% acetonitrile
                  11-12.5 min: 100-5% acetonitrile/water
=====
```

Sample Info : 00110512-3562-004

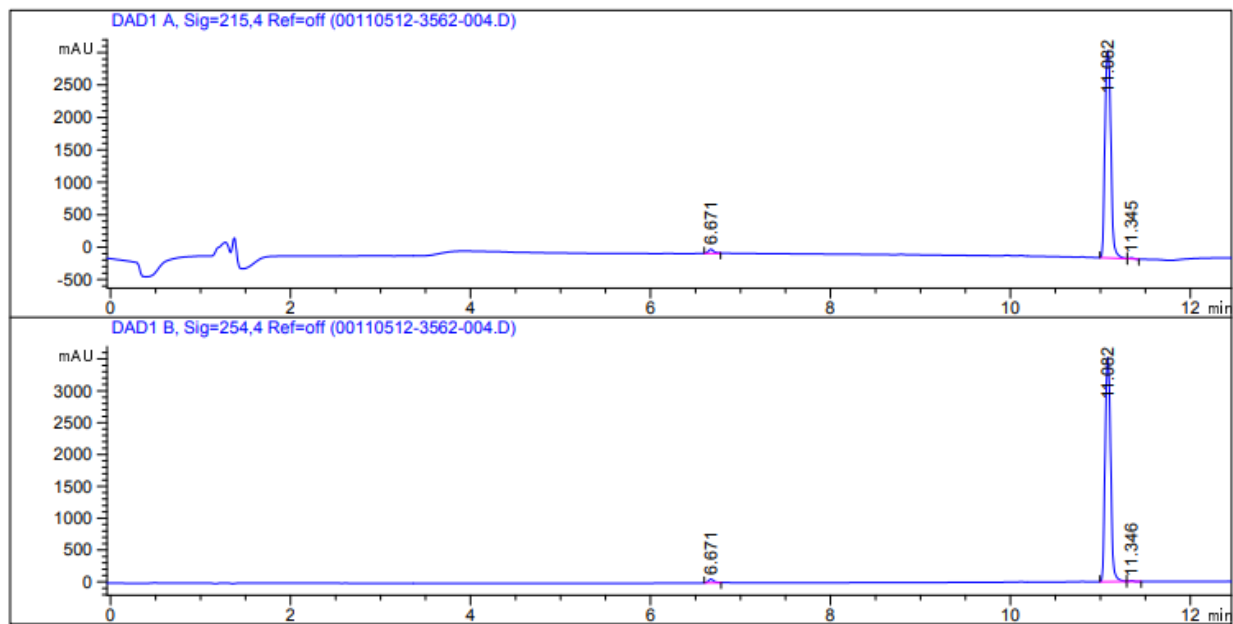

## Area Percent Report

```
=====
Sorted By      : Signal
Multiplier     : 1.0000
Dilution       : 1.0000
Do not use Multiplier & Dilution Factor with ISTDs
=====
```

Signal 1: DAD1 A, Sig=215,4 Ref=off

| Peak # | RetTime [min] | Type | Width [min] | Area [mAU*s] | Height [mAU] | Area %  |
|--------|---------------|------|-------------|--------------|--------------|---------|
| 1      | 6.671         | BB   | 0.0644      | 274.95190    | 63.60682     | 1.8365  |
| 2      | 11.082        | BV   | 0.0732      | 1.46410e4    | 3209.51489   | 97.7920 |
| 3      | 11.345        | VB   | 0.0533      | 55.62463     | 16.49937     | 0.3715  |

Totals : 1.49716e4 3289.62108

Signal 2: DAD1 B, Sig=254,4 Ref=off

| Peak # | RetTime [min] | Type | Width [min] | Area [mAU*s] | Height [mAU] | Area %  |
|--------|---------------|------|-------------|--------------|--------------|---------|
| 1      | 6.671         | BB   | 0.0644      | 252.87498    | 58.50365     | 1.6504  |
| 2      | 11.082        | BB   | 0.0696      | 1.50151e4    | 3532.13159   | 97.9943 |
| 3      | 11.346        | BB   | 0.0574      | 54.44085     | 14.63323     | 0.3553  |

Totals : 1.53225e4 3605.26847

=====  
\*\*\* End of Report \*\*\*

# Supplementary Figure 43. LCMS of compound S11



**S11**

MS Ionization : ESI

Instrument & Column: LCMS-AO(4-302) Chromolith. Flash RP-18e 25-2mm

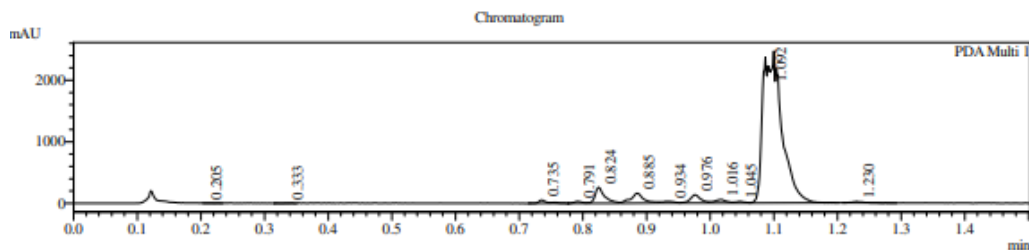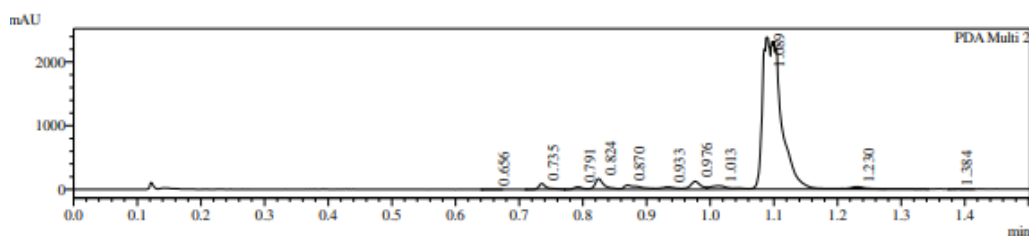

1 PDA Multi 1 / 220nm 4nm

2 PDA Multi 2 / 254nm 4nm

Segment#1 (x10,000,000)

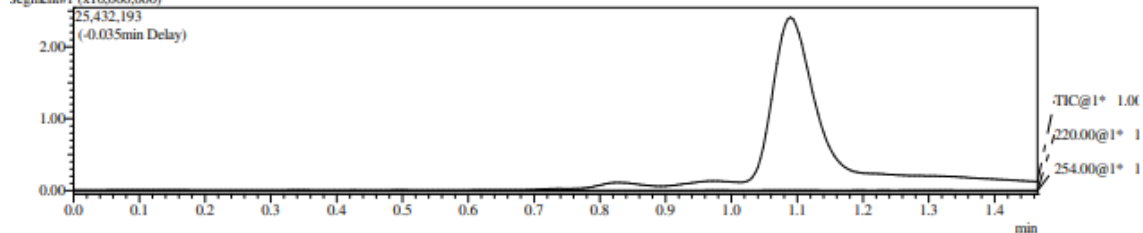

Integration Result

PDA Ch1 220nm 4nm

| Peak# | Ret. Time | Height  | Height % | USP Width | Area    | Area % |
|-------|-----------|---------|----------|-----------|---------|--------|
| 1     | 0.205     | 2209    | 0.075    | 0.011     | 3089    | 0.052  |
| 2     | 0.333     | 2421    | 0.083    | 0.056     | 4759    | 0.080  |
| 3     | 0.735     | 51657   | 1.764    | 0.021     | 51542   | 0.864  |
| 4     | 0.791     | 30427   | 1.039    | 0.026     | 27472   | 0.461  |
| 5     | 0.824     | 251295  | 8.582    | 0.027     | 268431  | 4.501  |
| 6     | 0.885     | 159999  | 5.464    | 0.033     | 226778  | 3.802  |
| 7     | 0.934     | 27653   | 0.944    | 0.050     | 37216   | 0.624  |
| 8     | 0.976     | 132772  | 4.534    | 0.031     | 154079  | 2.583  |
| 9     | 1.016     | 54021   | 1.845    | 0.038     | 71389   | 1.197  |
| 10    | 1.045     | 23064   | 0.788    | 0.025     | 24651   | 0.413  |
| 11    | 1.092     | 2174106 | 74.244   | 0.046     | 5066531 | 84.953 |
| 12    | 1.230     | 18691   | 0.638    | 0.037     | 28020   | 0.470  |

PDA Ch2 254nm 4nm

| Peak# | Ret. Time | Height | Height % | USP Width | Area  | Area % |
|-------|-----------|--------|----------|-----------|-------|--------|
| 1     | 0.656     | 2619   | 0.088    | 0.090     | 3035  | 0.054  |
| 2     | 0.735     | 90238  | 3.026    | 0.021     | 79163 | 1.399  |

| Peak# | Ret. Time | Height  | Height % | USP Width | Area    | Area % |
|-------|-----------|---------|----------|-----------|---------|--------|
| 3     | 0.791     | 37896   | 1.271    | 0.026     | 37006   | 0.654  |
| 4     | 0.824     | 161148  | 5.403    | 0.025     | 163388  | 2.888  |
| 5     | 0.870     | 65664   | 2.202    | 0.048     | 108551  | 1.919  |
| 6     | 0.933     | 37046   | 1.242    | 0.041     | 58674   | 1.037  |
| 7     | 0.976     | 120552  | 4.042    | 0.031     | 139263  | 2.461  |
| 8     | 1.013     | 53342   | 1.789    | 0.056     | 111290  | 1.967  |
| 9     | 1.089     | 2380165 | 79.809   | 0.043     | 4911657 | 86.809 |
| 10    | 1.230     | 32100   | 1.076    | 0.034     | 42757   | 0.756  |
| 11    | 1.384     | 1570    | 0.053    | 0.022     | 3229    | 0.057  |

RetTime: 1.090 DataFile: D:\DATA\1903\190328\00708262-1371-001.lcd

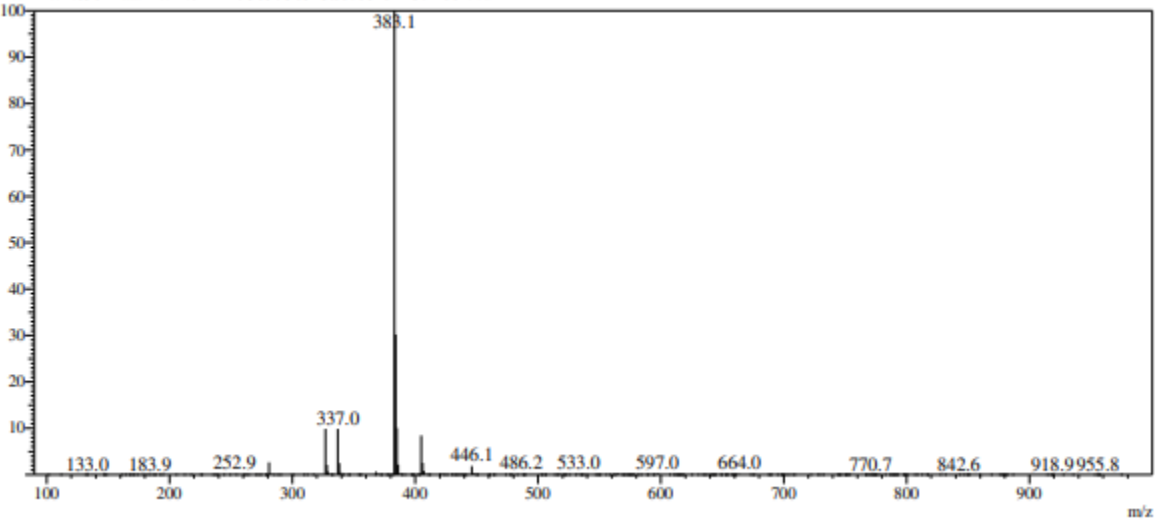

# Supplementary Figure 44. 1H NMR of PF-07238025

PF-07238025, 1H NMR (DMSO 400MHz)

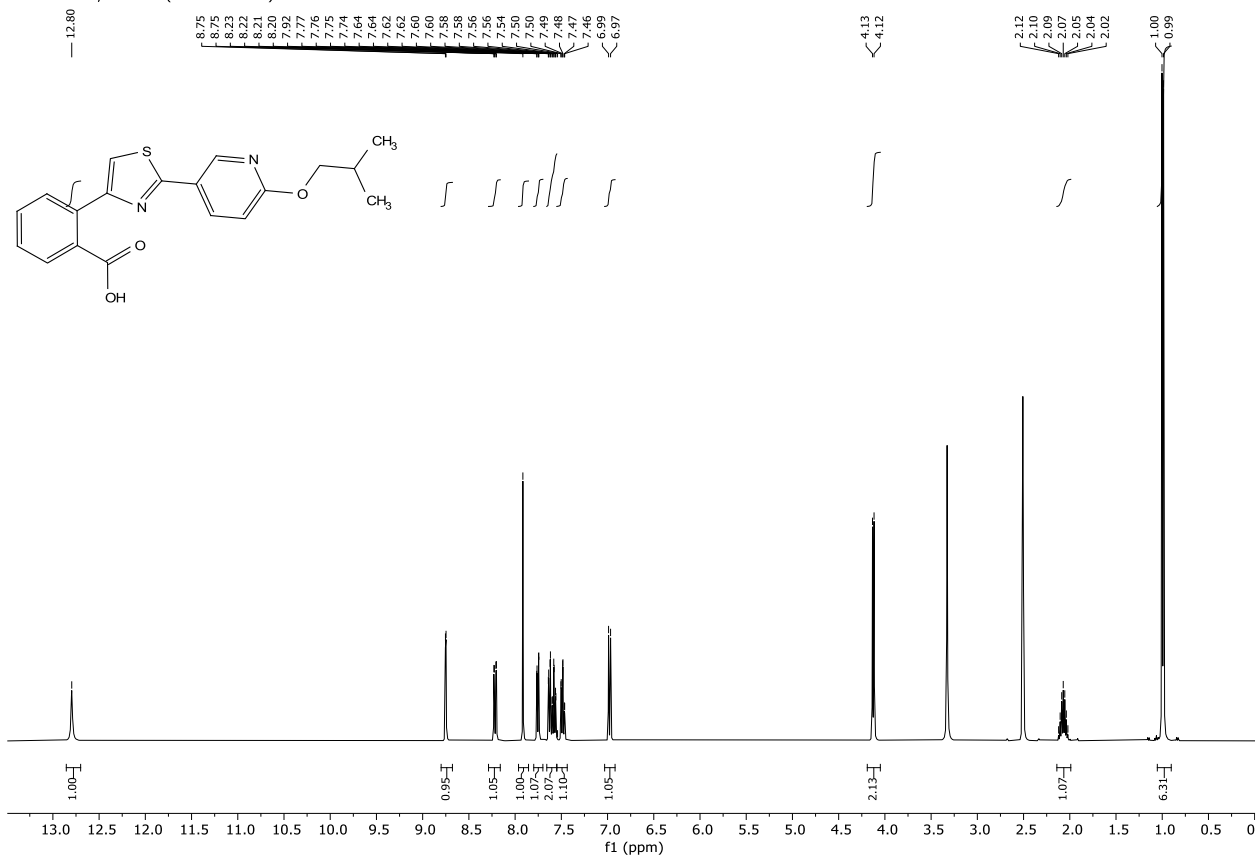

# Supplementary Figure 45. <sup>13</sup>C NMR of PF-07238025

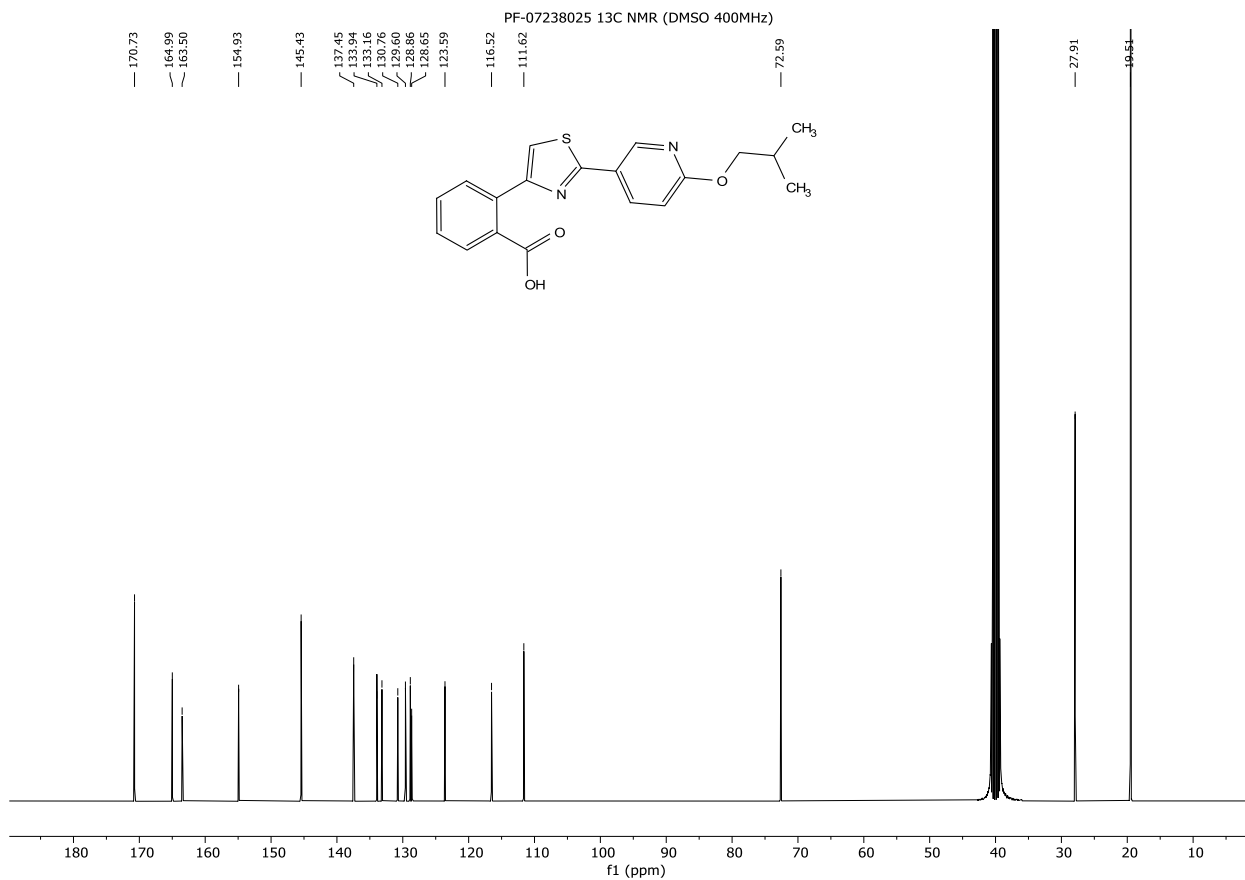

# Supplementary Figure 46. HRMS of PF-07238025

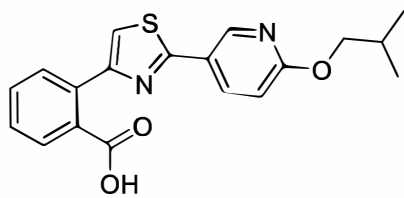

**PF-07238025**

| Open Access HRMS Sample Report |                                                                 |                    |                            |
|--------------------------------|-----------------------------------------------------------------|--------------------|----------------------------|
| Sample ID                      | 00110580-3430-001                                               | HPLC               | Agilent 1200               |
| Molecular Formula              | C <sub>19</sub> H <sub>18</sub> N <sub>2</sub> O <sub>3</sub> S | Mass Spectrometer  | Sciex 5600+ QToF           |
| Submittor                      | Martinez, Luis                                                  | DAD                | 190-400 nm, reported 270nm |
| Run Date                       | 4/27/2023                                                       | MS Scan            | 100-2000 amu               |
| Analyst                        | Quinn, Alandra                                                  | Acquisition Method | HRMS-3min gradient AQ      |
| Analyst's CeN                  | 00714673-0166                                                   | eWB Archive Ref    | 00713459-0294              |

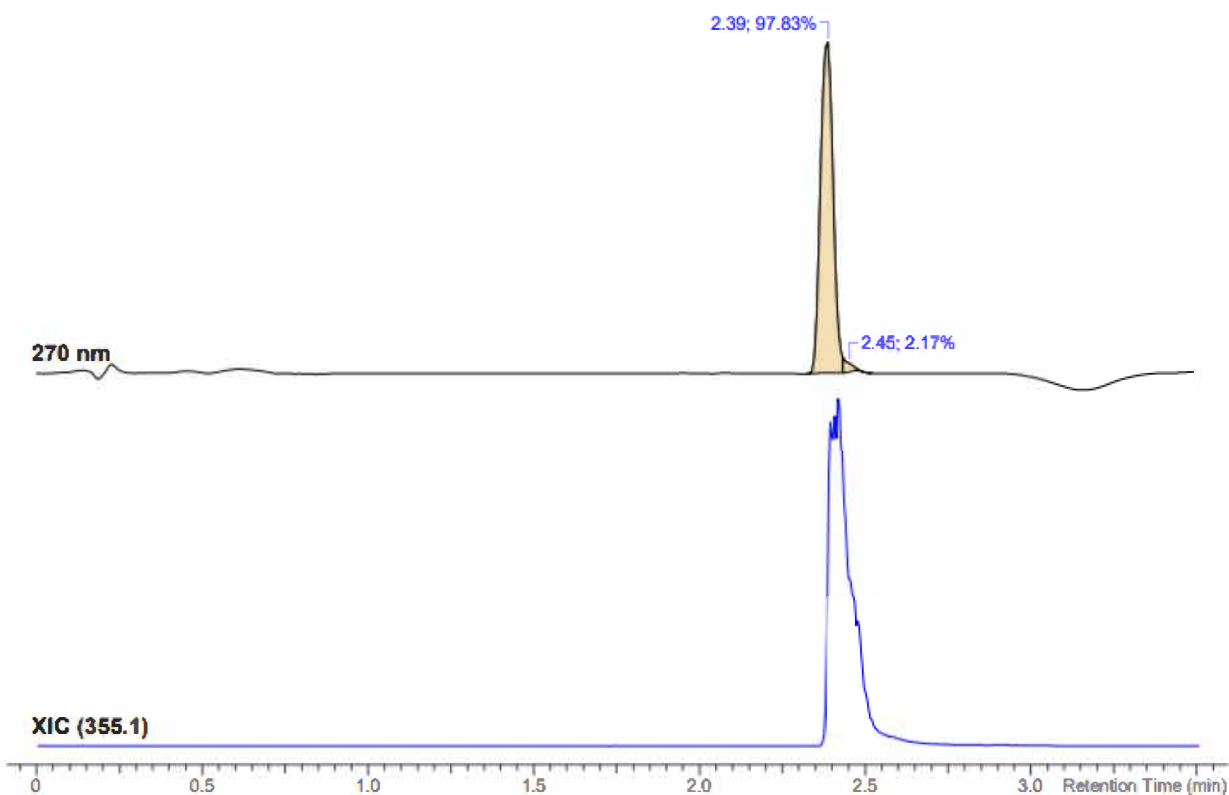

| No. | Peak Name                                                       | tR (min) | Area (%) |
|-----|-----------------------------------------------------------------|----------|----------|
| 1   | C <sub>19</sub> H <sub>18</sub> N <sub>2</sub> O <sub>3</sub> S | 2.39     | 97.83    |
| 2   | unknown                                                         | 2.45     | 2.17     |



● Spectrum from 00110580-3430-001.wiff (sample 1) - C<sub>19</sub>H<sub>18</sub>N<sub>2</sub>O<sub>3</sub>S, +TOF MS (100 - 2000) from 2.381 to 2.455 min  
 ● Isotopic Distribution for C<sub>19</sub>H<sub>18</sub>N<sub>2</sub>O<sub>3</sub>S H<sup>+</sup>

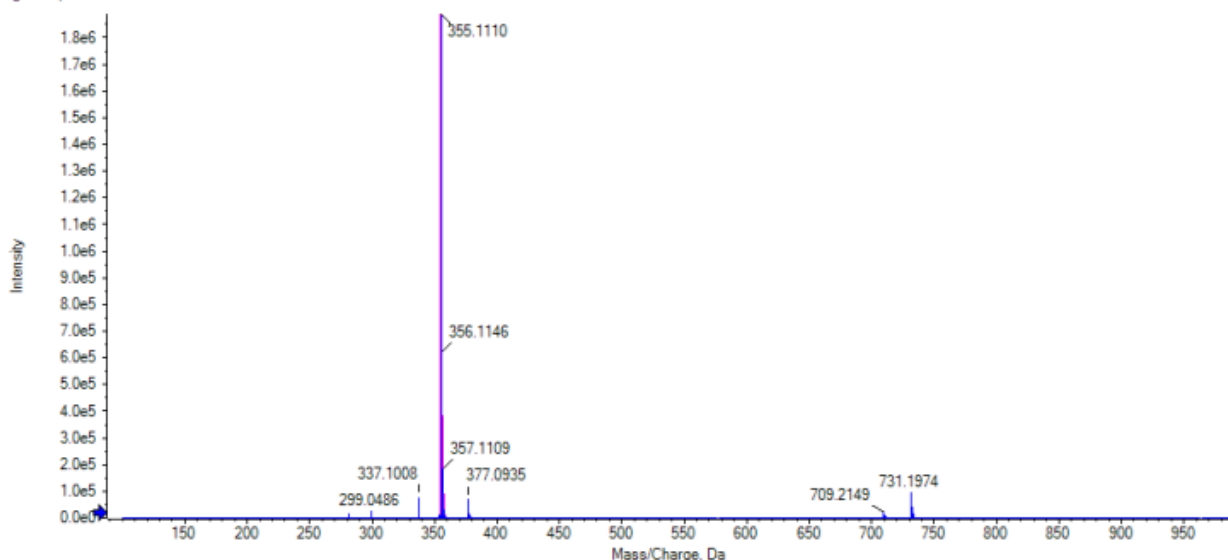

● Spectrum from 00110580-3430-001.wiff (sample 1) - C<sub>19</sub>H<sub>18</sub>N<sub>2</sub>O<sub>3</sub>S, +TOF MS (100 - 2000) from 2.381 to 2.455 min  
 ● Isotopic Distribution for C<sub>19</sub>H<sub>18</sub>N<sub>2</sub>O<sub>3</sub>S H<sup>+</sup>

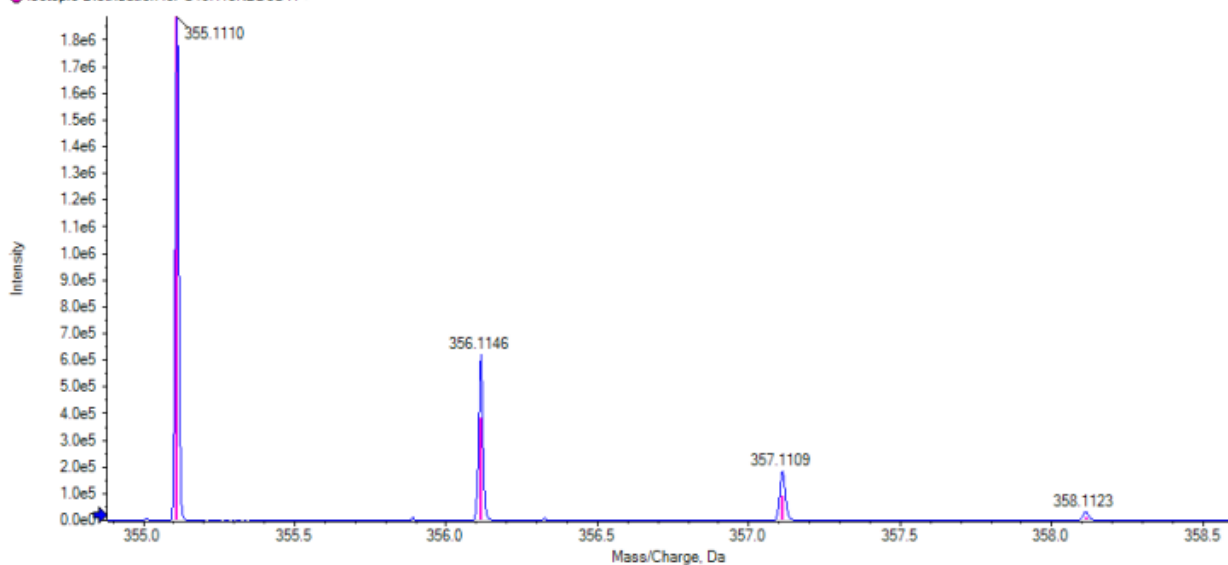

| Peak at 2.39 min in UV |         |                   |                                                                 |                    |                 |             |                 |                       |
|------------------------|---------|-------------------|-----------------------------------------------------------------|--------------------|-----------------|-------------|-----------------|-----------------------|
| Mass/Charge (Da)       | Height  | Relative % Height | Compound                                                        | Peak Type          | Theoretical m/z | Error (ppm) | Theoretical m/z | Theoretical Intensity |
| 355.1110               | 1886716 | 100.0             | C <sub>19</sub> H <sub>18</sub> N <sub>2</sub> O <sub>3</sub> S | [M+H] <sup>+</sup> | 355.1111        | -0.1        | 355.1111        | 100.0                 |
| 356.1146               | 622056  | 33.0              |                                                                 |                    |                 |             | 356.1141        | 23.0                  |
| 357.1109               | 184260  | 9.8               |                                                                 |                    |                 |             | 357.1110        | 7.5                   |
| 358.1123               | 32639   | 1.7               |                                                                 |                    |                 |             | 358.1123        | 1.3                   |



=====  
Area Percent Report  
=====

Sorted By : Signal  
Multiplier : 1.0000  
Dilution : 1.0000  
Do not use Multiplier & Dilution Factor with ISTDs

Signal 1: DAD1 A, Sig=210,4 Ref=off

| Peak # | RetTime [min] | Type | Width [min] | Area [mAU*s] | Height [mAU] | Area %  |
|--------|---------------|------|-------------|--------------|--------------|---------|
| 1      | 1.521         | BB   | 0.3515      | 1026.59692   | 44.11615     | 10.7388 |
| 2      | 9.149         | BB   | 0.0549      | 8533.05957   | 2434.75903   | 89.2612 |

Totals : 9559.65649 2478.87518

Signal 2: DAD1 B, Sig=254,4 Ref=off

| Peak # | RetTime [min] | Type | Width [min] | Area [mAU*s] | Height [mAU] | Area %   |
|--------|---------------|------|-------------|--------------|--------------|----------|
| 1      | 9.149         | BB   | 0.0534      | 6460.28711   | 1915.08313   | 100.0000 |

Totals : 6460.28711 1915.08313

Signal 3: DAD1 C, Sig=280,4 Ref=off

| Peak # | RetTime [min] | Type | Width [min] | Area [mAU*s] | Height [mAU] | Area %   |
|--------|---------------|------|-------------|--------------|--------------|----------|
| 1      | 9.148         | BB   | 0.0533      | 5073.91406   | 1506.82288   | 100.0000 |

Totals : 5073.91406 1506.82288

=====  
\*\*\* End of Report \*\*\*

# Supplementary Figure 48. 1H NMR of compound S12

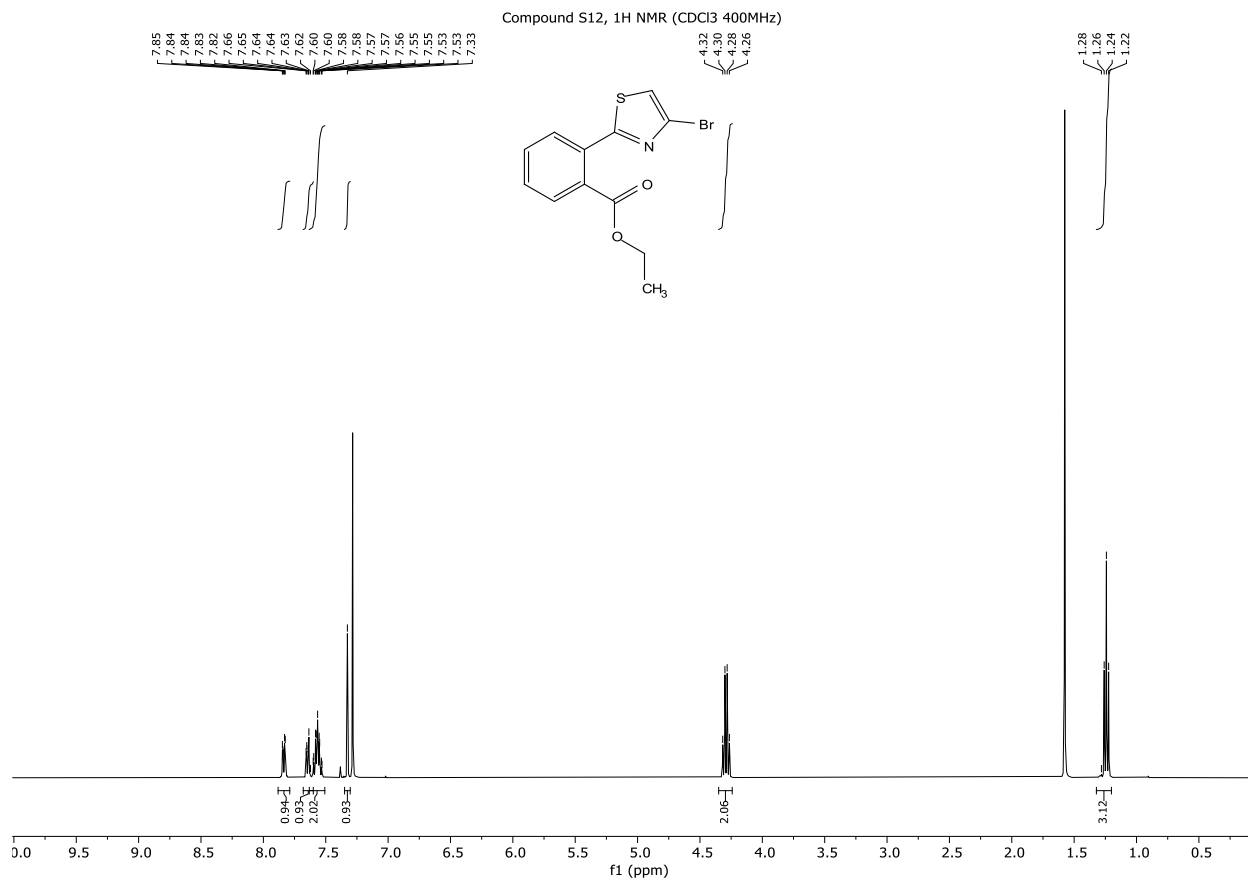

# Supplementary Figure 49. <sup>13</sup>C NMR of compound S12

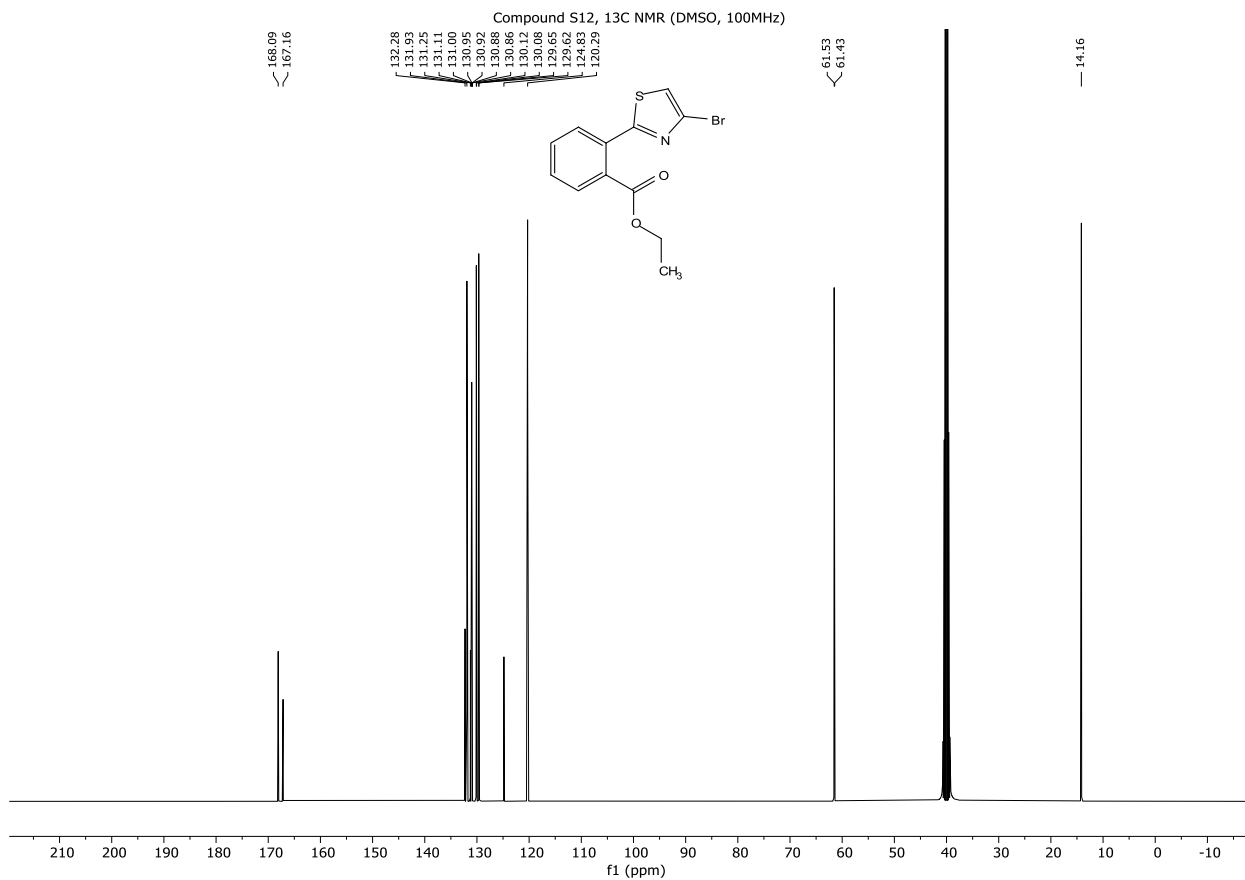

## Supplementary Figure 50. HRMS of compound S12

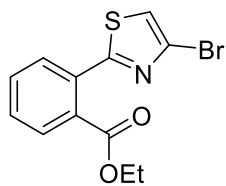

S12

| Open Access HRMS Sample Report |                                                     |                    |                            |
|--------------------------------|-----------------------------------------------------|--------------------|----------------------------|
| Sample ID                      | 00711867-0388-001                                   | HPLC               | Agilent 1200               |
| Molecular Formula              | C <sub>12</sub> H <sub>10</sub> BrNO <sub>2</sub> S | Mass Spectrometer  | Sciex 5600+ QToF           |
| Submittor                      | Martinez, Luis                                      | DAD                | 190-400 nm, reported 270nm |
| Run Date                       | 4/27/2023                                           | MS Scan            | 100-2000 amu               |
| Analyst                        | Quinn, Alandra                                      | Acquisition Method | HRMS-3min gradient AQ      |
| Analyst's CeN                  | 00714673-0166                                       | eWB Archive Ref    | 00713459-0294              |

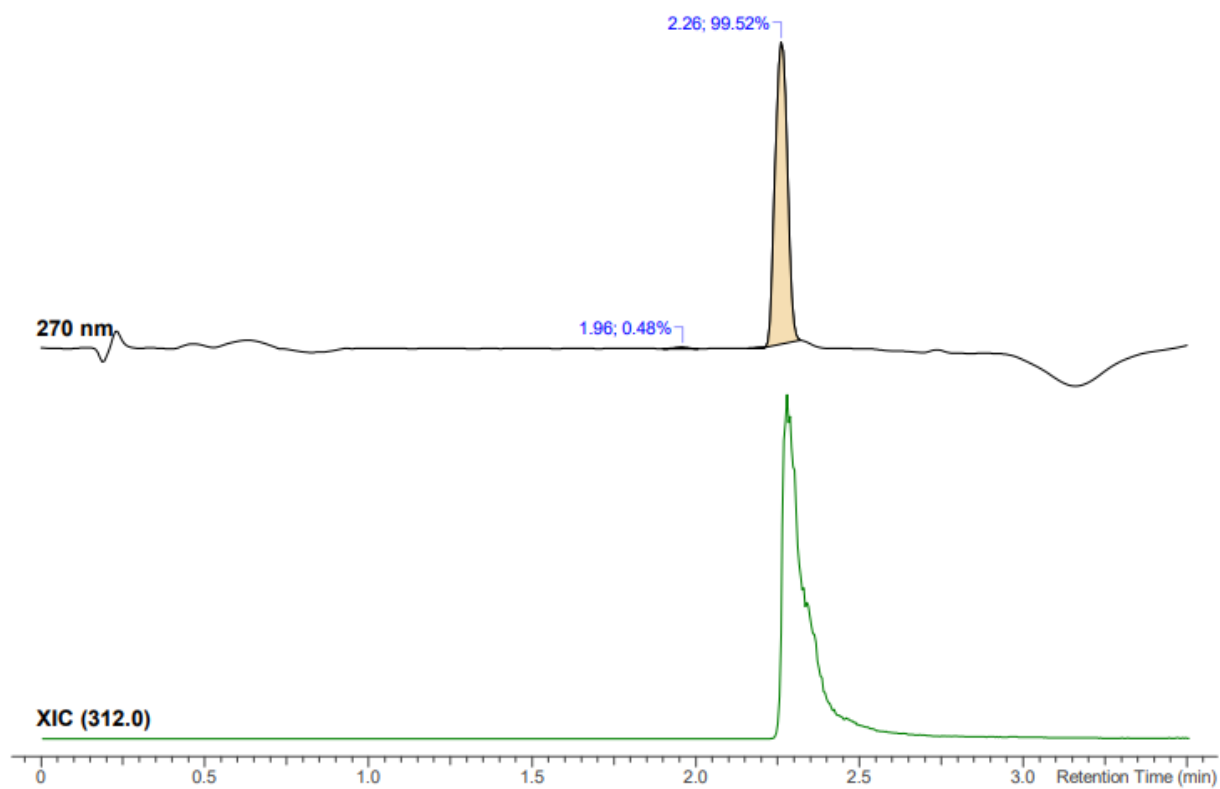

| No. | Peak Name                                           | tR (min) | Area (%) |
|-----|-----------------------------------------------------|----------|----------|
| 1   | unknown                                             | 1.96     | 0.48     |
| 2   | C <sub>12</sub> H <sub>10</sub> BrNO <sub>2</sub> S | 2.26     | 99.52    |

● Spectrum from 00711867-0388-001.wiff (sample 1) - C12H10BrNO2S, +TOF MS (100 - 2000) from 2.264 to 2.325 min  
 ● Isotopic Distribution for C12H10BrNO2S H +

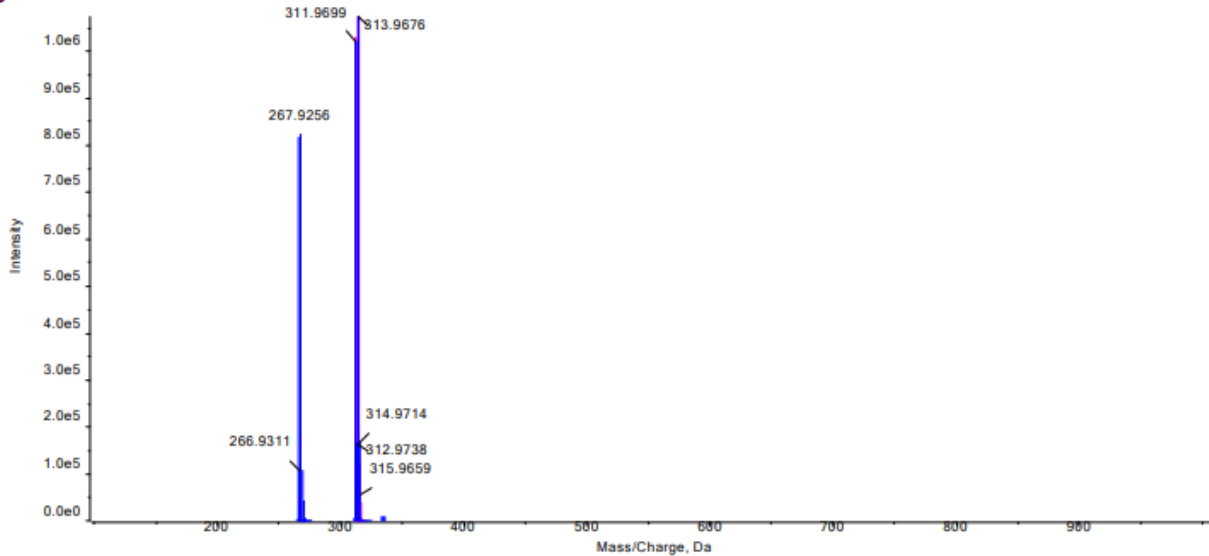

● Spectrum from 00711867-0388-001.wiff (sample 1) - C12H10BrNO2S, +TOF MS (100 - 2000) from 2.264 to 2.325 min  
 ● Isotopic Distribution for C12H10BrNO2S H +

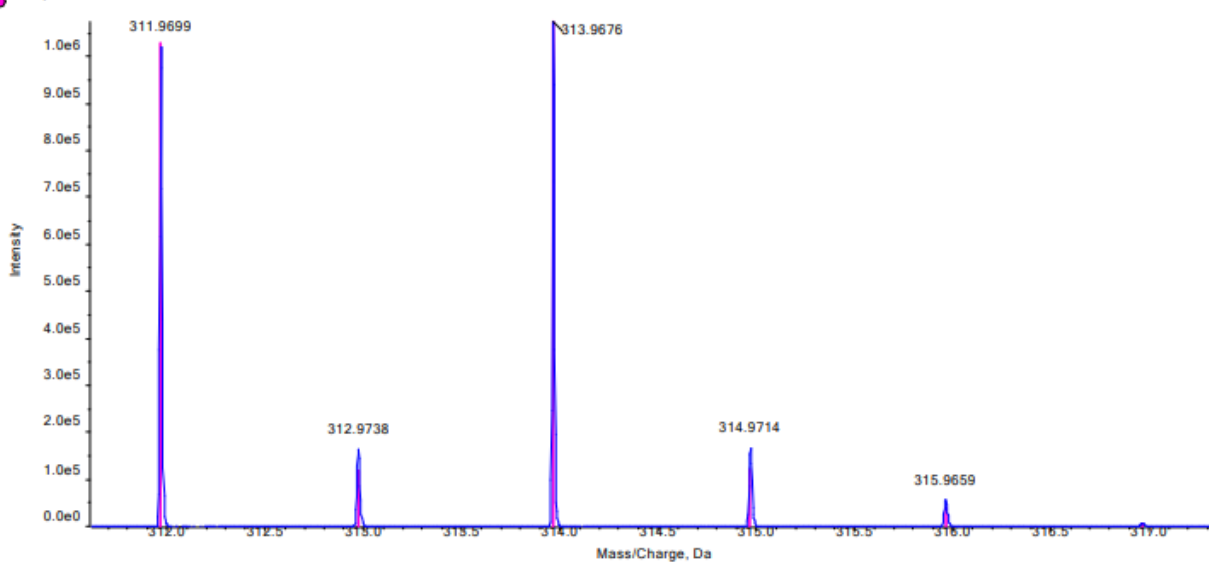

| Peak at 2.26 min in UV |         |                   |              |                    |                 |             |                 |                       |
|------------------------|---------|-------------------|--------------|--------------------|-----------------|-------------|-----------------|-----------------------|
| Mass/Charge (Da)       | Height  | Relative % Height | Compound     | Peak Type          | Theoretical m/z | Error (ppm) | Theoretical m/z | Theoretical Intensity |
| 311.9699               | 1021812 | 95.1              | C12H10BrNO2S | [M+H] <sup>+</sup> | 311.9688        | 3.4         | 311.9688        | 97.0                  |
| 312.9738               | 164442  | 15.3              |              |                    |                 |             | 312.9719        | 14.3                  |
| 313.9676               | 1073990 | 100.0             |              |                    |                 |             | 313.9668        | 100.0                 |
| 314.9714               | 166621  | 15.5              |              |                    |                 |             | 314.9698        | 14.6                  |
| 315.9659               | 57382   | 5.3               |              |                    |                 |             | 315.9650        | 5.6                   |

# Supplementary Figure 51. HPLC of compound S12

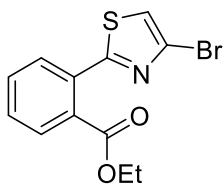

**S12**

```

=====
Acq. Operator   : SYSTEM                      Seq. Line :    5
Sample Operator : SYSTEM
Acq. Instrument : HPLC-233GA                 Location  :   10
Injection Date  : 4/27/2023 1:30:55 PM       Inj       :    1
                                           Inj Volume: 10.000 µl

Acq. Method     : C:\Users\Public\Documents\ChemStation\1\Data\def_LC_2021 2023-04-27 12-29-18\ACID_GRADIENT.M
Last changed    : 6/9/2021 9:16:24 AM by SYSTEM
Analysis Method : C:\Users\Public\Documents\ChemStation\1\Data\def_LC_2021 2023-04-27 12-29-18\ACID_GRADIENT.M (Sequence Method)
Last changed    : 4/28/2023 2:01:26 PM by SYSTEM
                 (modified after loading)

Method Info     : Column: XBridge C18 5 micron (4.6 mm x 150 mm)
                 Flow rate: 1.500 mL/min with solvents containing 0.1% TFA
                 0-1.5 min: 5% acetonitrile/water
                 1.5-10 min: 5-100% acetonitrile water
                 10-11 min: 100% acetonitrile
                 11-12.5 min: 100-5% acetonitrile/water
    
```

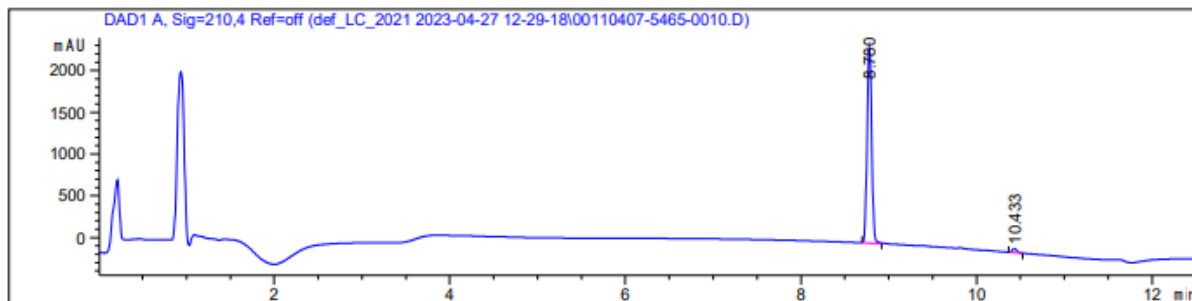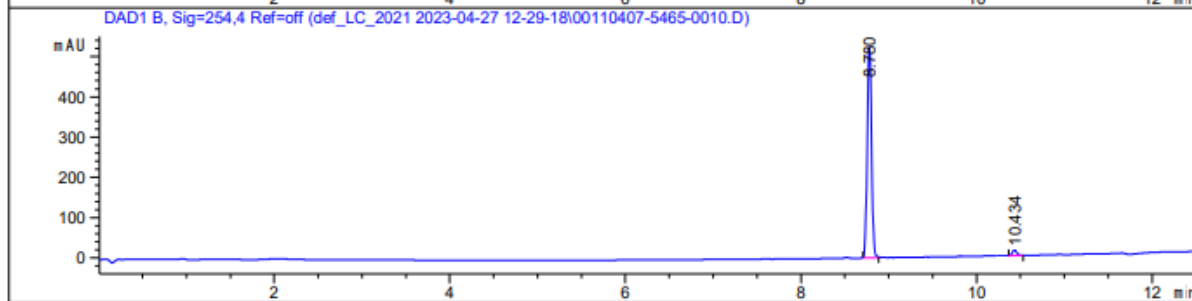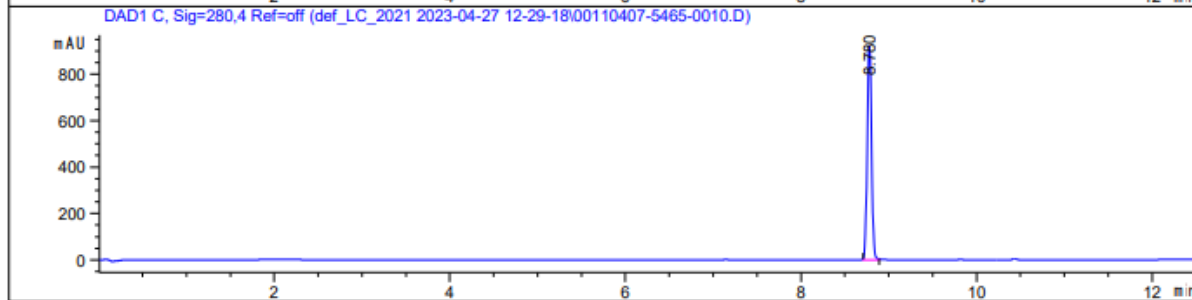



=====  
 Area Percent Report  
 =====

Sorted By : Signal  
 Multiplier : 1.0000  
 Dilution : 1.0000  
 Do not use Multiplier & Dilution Factor with ISTDs

Signal 1: DAD1 A, Sig=210,4 Ref=off

| Peak # | RetTime [min] | Type | Width [min] | Area [mAU*s] | Height [mAU] | Area %  |
|--------|---------------|------|-------------|--------------|--------------|---------|
| 1      | 8.780         | BB   | 0.0568      | 8567.22363   | 2332.77637   | 97.9666 |
| 2      | 10.433        | BB   | 0.0537      | 177.82544    | 52.29279     | 2.0334  |

Totals : 8745.04907 2385.06916

Signal 2: DAD1 B, Sig=254,4 Ref=off

| Peak # | RetTime [min] | Type | Width [min] | Area [mAU*s] | Height [mAU] | Area %  |
|--------|---------------|------|-------------|--------------|--------------|---------|
| 1      | 8.780         | BB   | 0.0542      | 1805.83240   | 523.63135    | 97.4147 |
| 2      | 10.434        | BB   | 0.0533      | 47.92553     | 14.21884     | 2.5853  |

Totals : 1853.75793 537.85019

Signal 3: DAD1 C, Sig=280,4 Ref=off

| Peak # | RetTime [min] | Type | Width [min] | Area [mAU*s] | Height [mAU] | Area %   |
|--------|---------------|------|-------------|--------------|--------------|----------|
| 1      | 8.780         | BB   | 0.0543      | 3189.18506   | 923.13580    | 100.0000 |

Totals : 3189.18506 923.13580

=====  
 \*\*\* End of Report \*\*\*

# Supplementary Figure 52. 1H NMR of compound S13

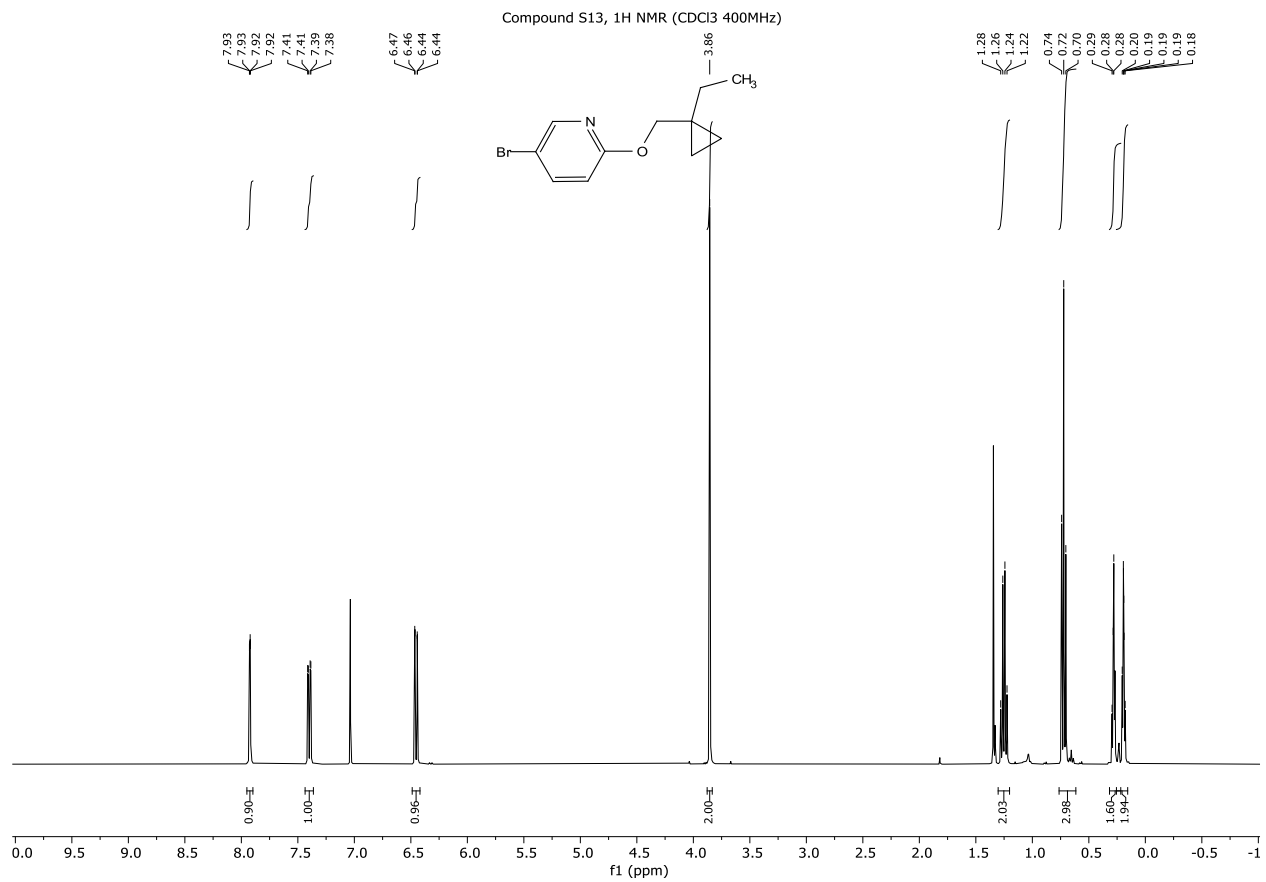

# Supplementary Figure 53. <sup>13</sup>C NMR of compound S13

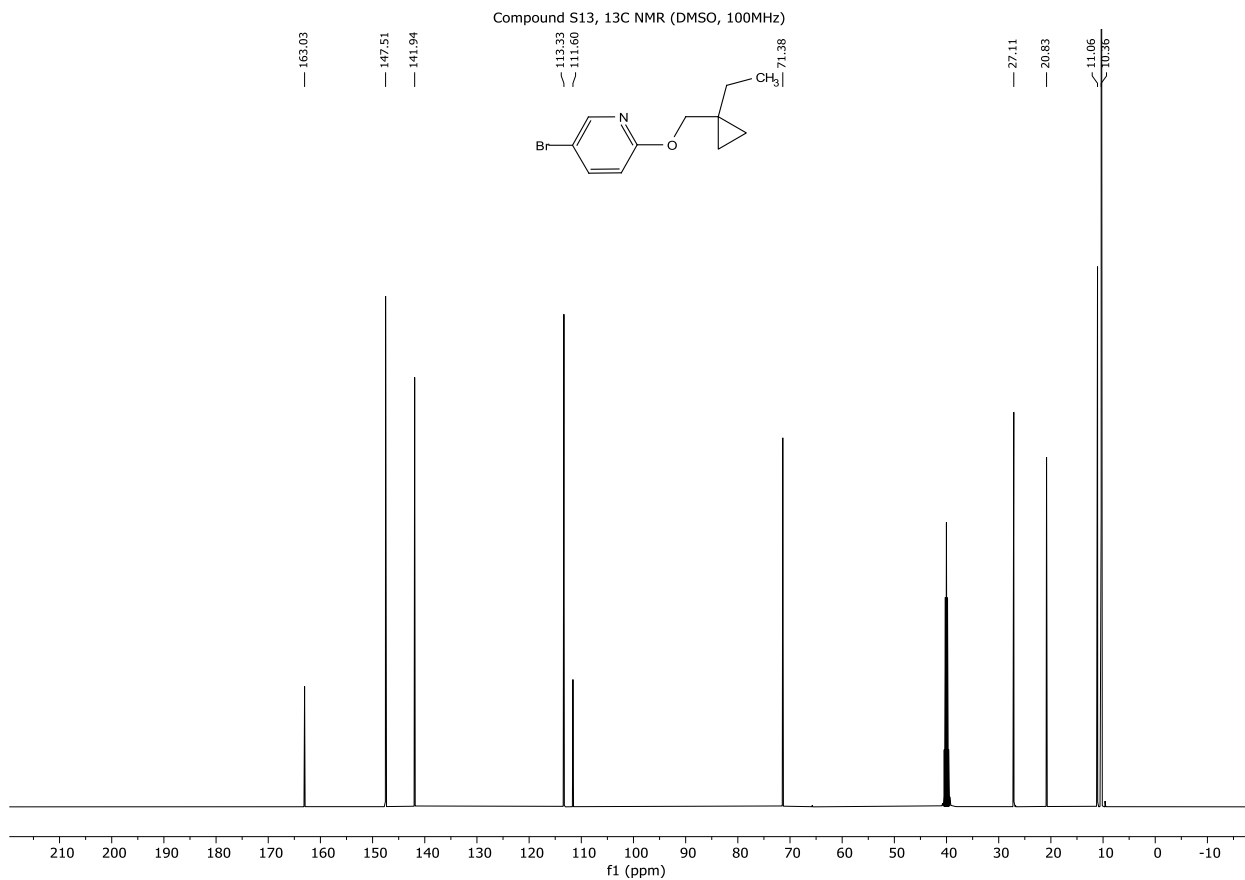

# Supplementary Figure 54. HRMS of compound S13

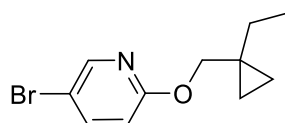

S13

| Open Access HRMS Sample Report |                                      |                    |                            |
|--------------------------------|--------------------------------------|--------------------|----------------------------|
| Sample ID                      | 00180155-0098-001                    | HPLC               | Agilent 1200               |
| Molecular Formula              | C <sub>11</sub> H <sub>14</sub> BrNO | Mass Spectrometer  | Sciex 5600+ QToF           |
| Submittor                      | Martinez, Luis                       | DAD                | 190-400 nm, reported 270nm |
| Run Date                       | 4/27/2023                            | MS Scan            | 100-2000 amu               |
| Analyst                        | Quinn, Alandra                       | Acquisition Method | HRMS-3min gradient AQ      |
| Analyst's CeN                  | 00714673-0166                        | eWB Archive Ref    | 00713459-0294              |

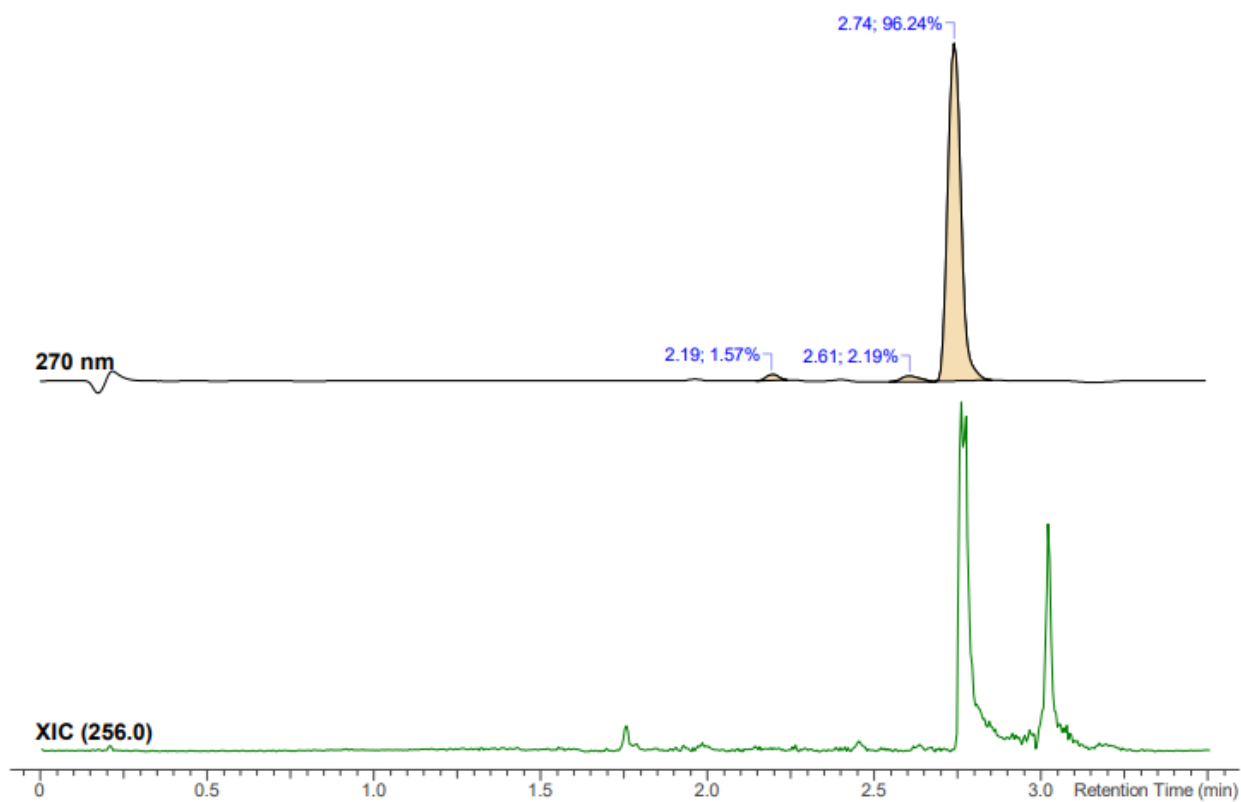

| No. | Peak Name                            | tR (min) | Area (%) |
|-----|--------------------------------------|----------|----------|
| 1   | unknown                              | 2.19     | 1.57     |
| 2   | unknown                              | 2.61     | 2.19     |
| 3   | C <sub>11</sub> H <sub>14</sub> BrNO | 2.74     | 96.24    |

● Spectrum from 00180155-0098-001\_5.wiff (sample 1) - C11H12BrNO, +TOF MS (100 - 2000) from 2.748 to 2.794 min  
 ● Isotopic Distribution for C11H14BrNO H +

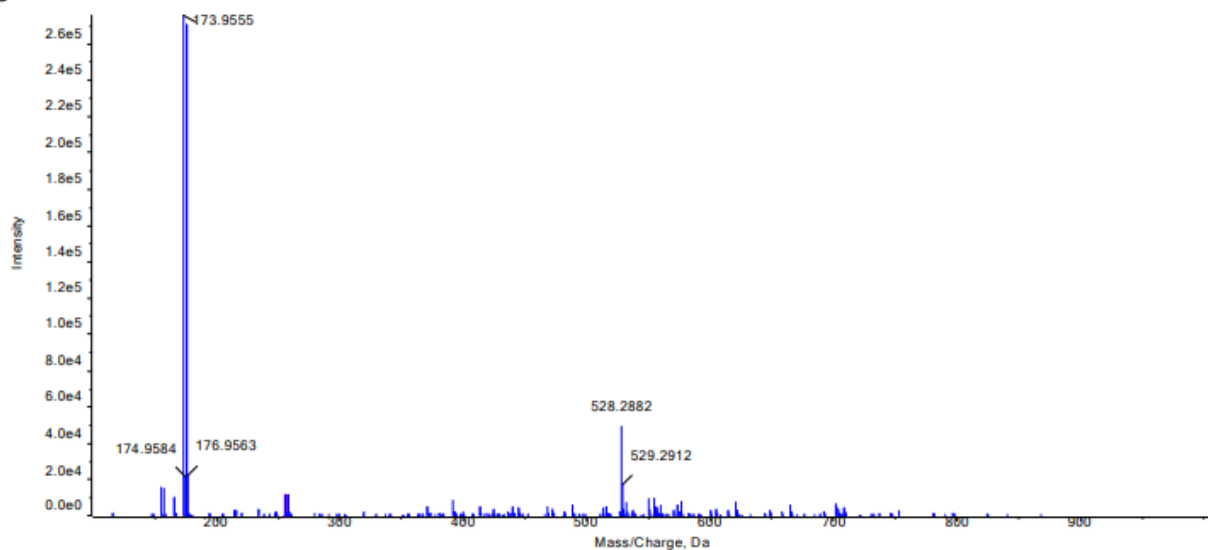

● Spectrum from 00180155-0098-001\_5.wiff (sample 1) - C11H12BrNO, +TOF MS (100 - 2000) from 2.748 to 2.794 min  
 ● Isotopic Distribution for C11H14BrNO H +

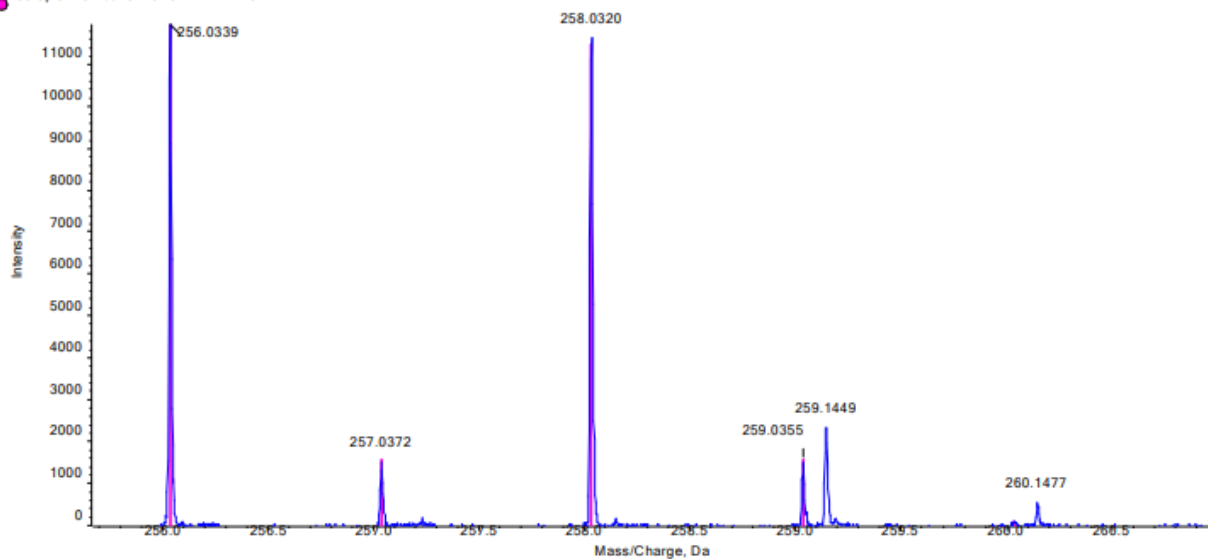

| Peak at 2.74 min in UV |        |                   |            |                    |                 |             |                 |                       |
|------------------------|--------|-------------------|------------|--------------------|-----------------|-------------|-----------------|-----------------------|
| Mass/Charge (Da)       | Height | Relative % Height | Compound   | Peak Type          | Theoretical m/z | Error (ppm) | Theoretical m/z | Theoretical Intensity |
| 256.0339               | 11951  | 100.0             | C11H14BrNO | [M+H] <sup>+</sup> | 256.0332        | 2.8         | 256.0332        | 100.0                 |
| 257.0372               | 1510   | 12.6              |            |                    |                 |             | 257.0364        | 12.8                  |
| 258.0320               | 11641  | 97.4              |            |                    |                 |             | 258.0312        | 98.2                  |
| 259.0355               | 1504   | 12.6              |            |                    |                 |             | 259.0343        | 12.5                  |
| 260.0388               | 93     | 0.8               |            |                    |                 |             | 258.0214        | 0.9                   |



=====  
 Area Percent Report  
 =====

Sorted By : Signal  
 Multiplier : 1.0000  
 Dilution : 1.0000  
 Do not use Multiplier & Dilution Factor with ISTDs

Signal 1: DAD1 A, Sig=210,4 Ref=off

| Peak # | RetTime [min] | Type | Width [min] | Area [mAU*s] | Height [mAU] | Area %  |
|--------|---------------|------|-------------|--------------|--------------|---------|
| 1      | 8.707         | BB   | 0.0581      | 145.41386    | 38.43911     | 1.8333  |
| 2      | 9.411         | BB   | 0.0953      | 91.78696     | 12.84769     | 1.1572  |
| 3      | 10.298        | BB   | 0.0551      | 45.86970     | 13.01597     | 0.5783  |
| 4      | 10.637        | BB   | 0.0550      | 7648.67236   | 2175.46094   | 96.4312 |

Totals : 7931.74288 2239.76370

Signal 2: DAD1 B, Sig=254,4 Ref=off

| Peak # | RetTime [min] | Type | Width [min] | Area [mAU*s] | Height [mAU] | Area %   |
|--------|---------------|------|-------------|--------------|--------------|----------|
| 1      | 10.637        | BB   | 0.0538      | 1003.27765   | 293.85690    | 100.0000 |

Totals : 1003.27765 293.85690

Signal 3: DAD1 C, Sig=280,4 Ref=off

| Peak # | RetTime [min] | Type | Width [min] | Area [mAU*s] | Height [mAU] | Area %  |
|--------|---------------|------|-------------|--------------|--------------|---------|
| 1      | 8.708         | BB   | 0.0569      | 83.47157     | 22.68753     | 1.7387  |
| 2      | 9.246         | BB   | 0.0537      | 38.49805     | 11.30905     | 0.8019  |
| 3      | 10.637        | BB   | 0.0540      | 4678.93945   | 1365.01904   | 97.4594 |

Totals : 4800.90908 1399.01562

=====  
 \*\*\* End of Report \*\*\*

# Supplementary Figure 56. 1H NMR of compound S15

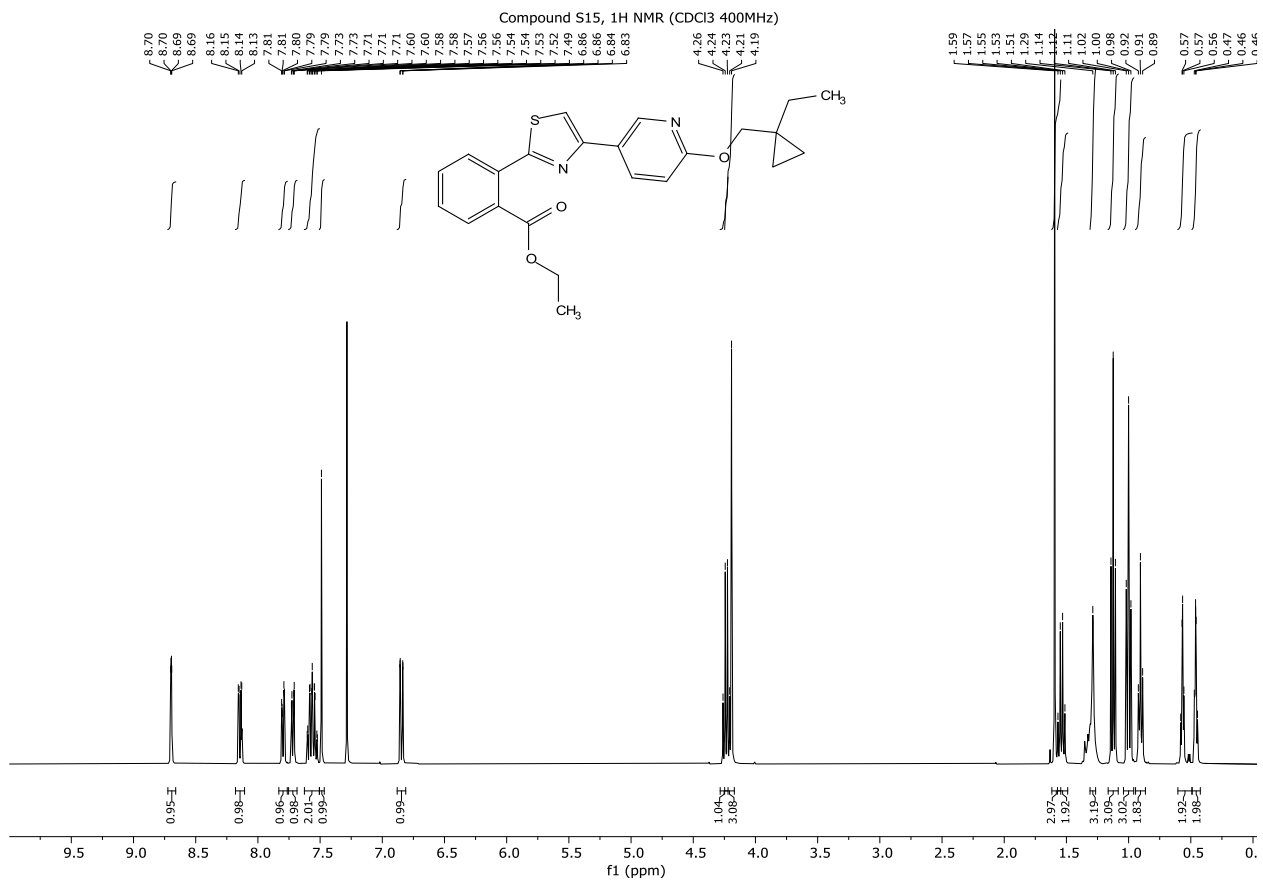



# Supplementary Figure 57. LCMS of compound S15

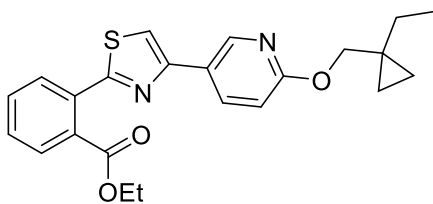

S15

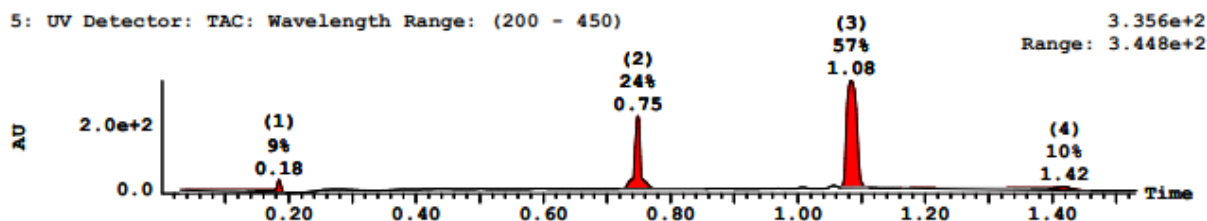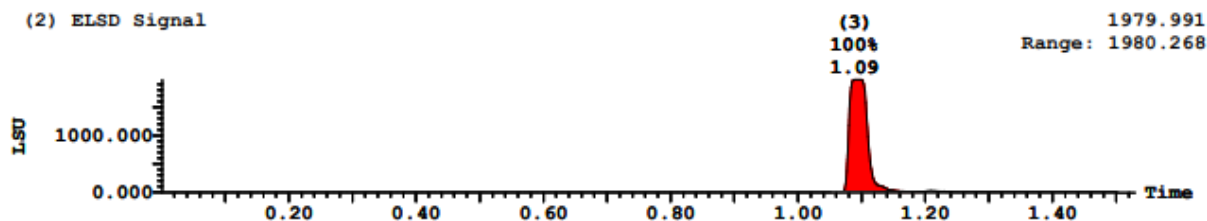

| Peak ID | Time | Mass Found | AreaAbs | Area %Total |
|---------|------|------------|---------|-------------|
| 3       | 1.09 | Not Found  | 65045   | 100.00      |

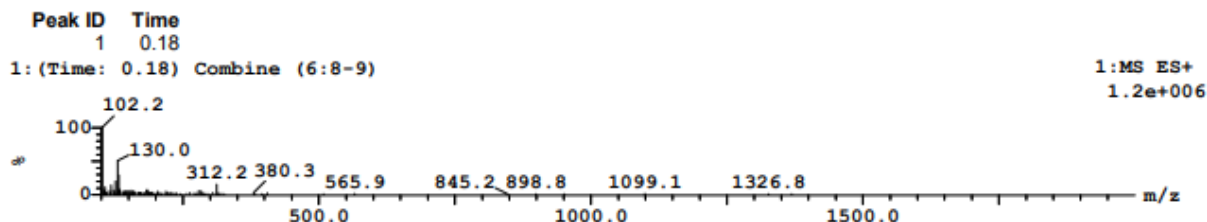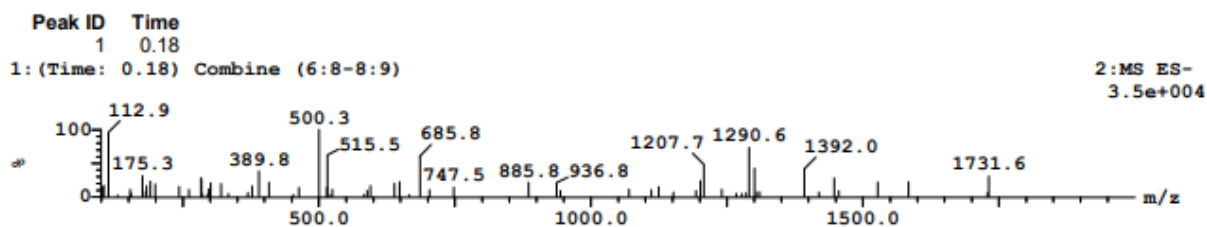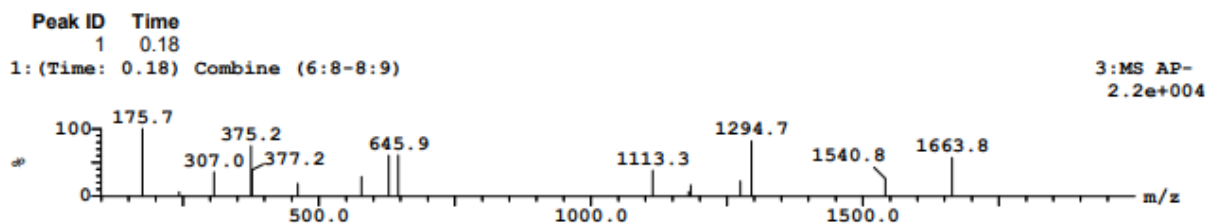

Peak ID Time  
1 0.18  
1: (Time: 0.18) Combine (6:7-8:9) 4:MS AP+  
9.8e+004

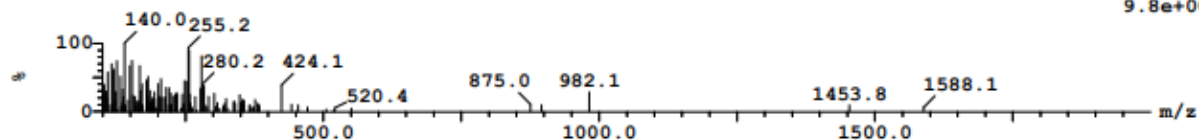

Peak ID Time  
2 0.75  
2: (Time: 0.75) Combine (26:28-(24:25+32:33)) 1:MS ES+  
6.3e+006

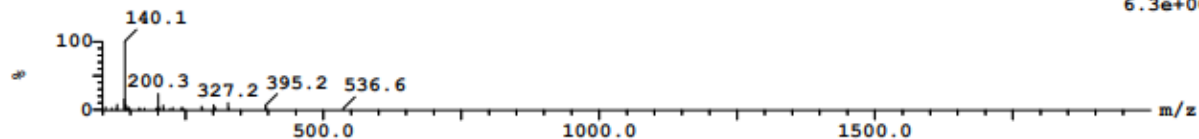

Peak ID Time  
2 0.75  
2: (Time: 0.75) Combine (26:28-(24:25+31:32)) 2:MS ES-  
3.5e+004

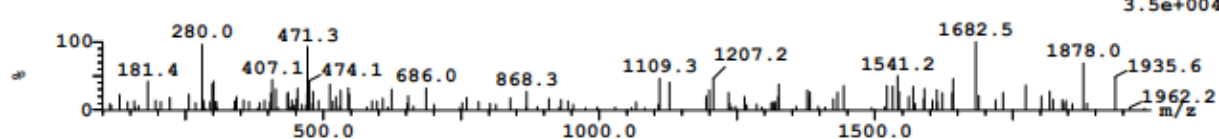

Peak ID Time  
2 0.75  
2: (Time: 0.75) Combine (26:27-(24:25+31:32)) 3:MS AP-  
4.5e+004

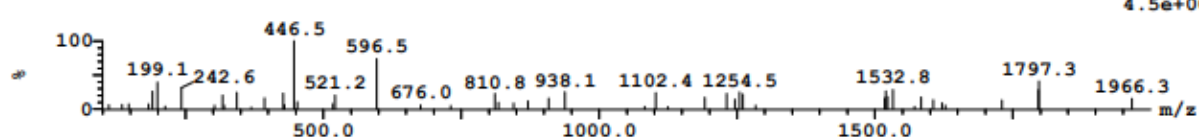

Peak ID Time  
2 0.75  
2: (Time: 0.75) Combine (25:27-(24+31:32)) 4:MS AP+  
6.8e+005

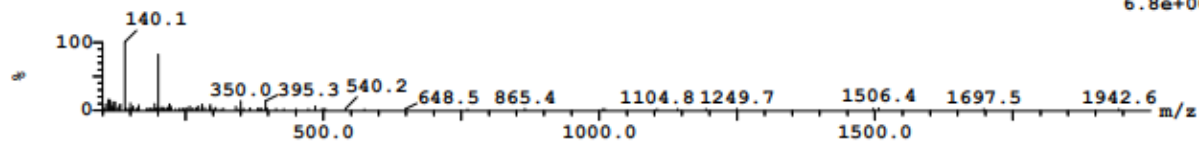

Peak ID Time

3 1.08

3: (Time: 1.09) Combine (38:40-(36:37+44))

1:MS ES+

4.5e+007

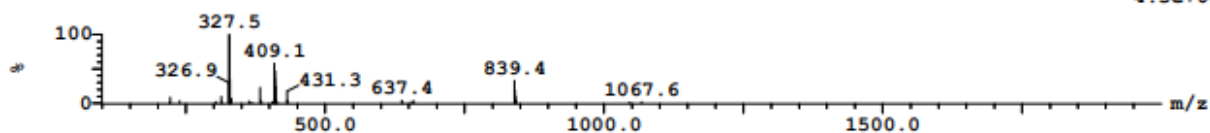

Peak ID Time

3 1.08

3: (Time: 1.09) Combine (38:40-(36:37+43:44))

2:MS ES-

5.6e+004

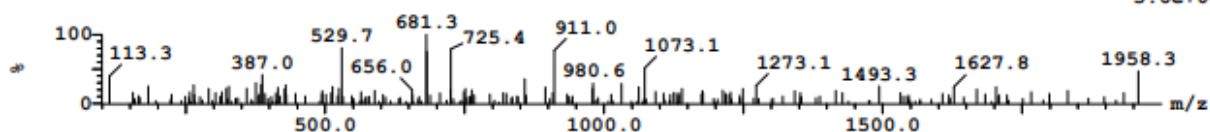

Peak ID Time

3 1.08

3: (Time: 1.09) Combine (38:39-(36+43:44))

3:MS AP-

5.4e+004

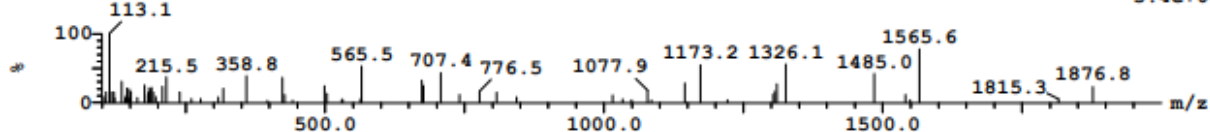

Peak ID Time

3 1.08

3: (Time: 1.09) Combine (37:39-(35:36+43:44))

4:MS AP+

1.7e+007

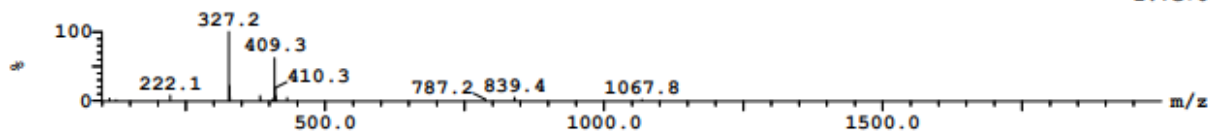

Peak ID Time

4 1.42

4: (Time: 1.42) Combine (50:52-40:41)

1:MS ES+

5.0e+006

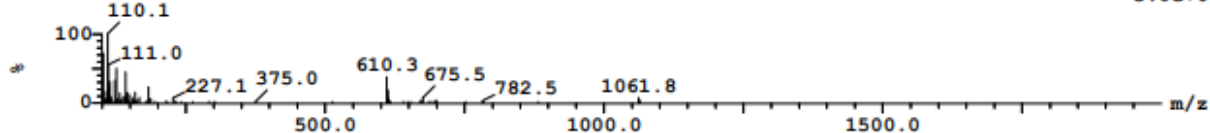

Peak ID Time

4 1.42

4: (Time: 1.42) Combine (50:51-(40+53))

2:MS ES-  
9.7e+004

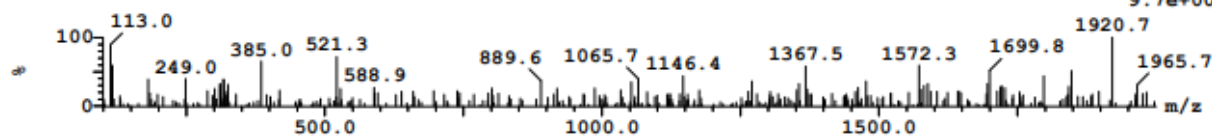

Peak ID Time

4 1.42

4: (Time: 1.42) Combine (49:51-(39:40+53))

3:MS AP-  
1.1e+005

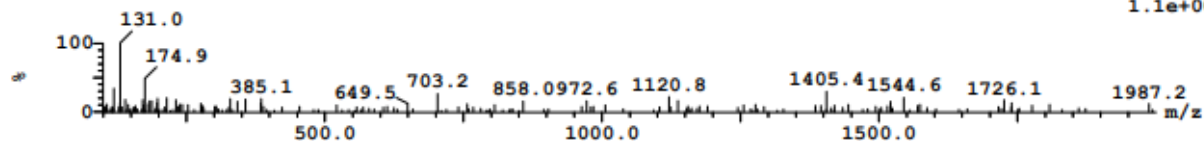

Peak ID Time

4 1.42

4: (Time: 1.42) Combine (49:51-(39:40+52:53))

4:MS AP+  
5.5e+005

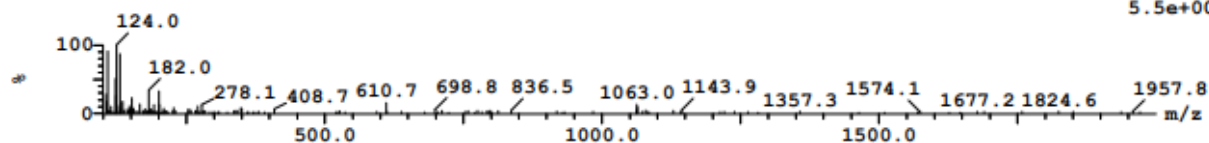

# Supplementary Figure 58. 1H NMR of PF-07247685

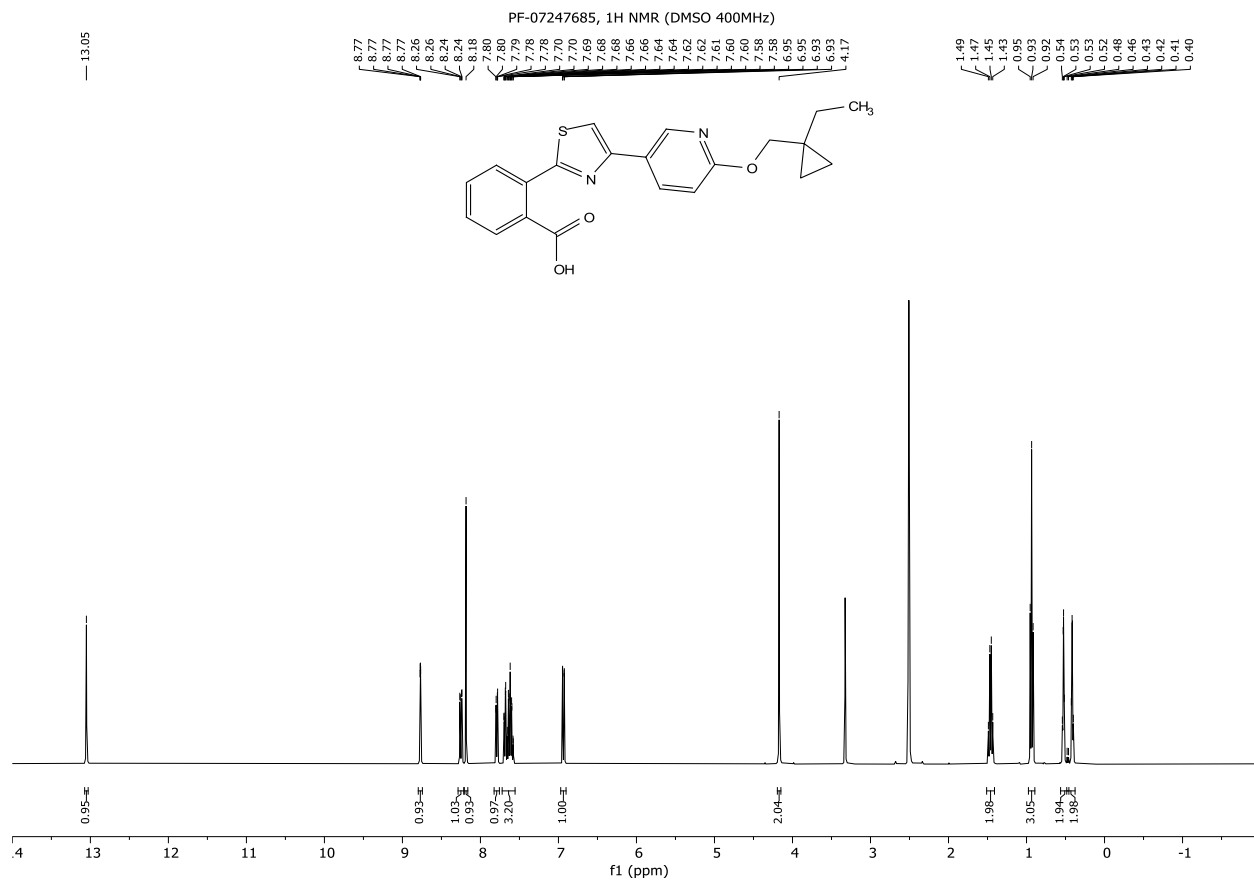

# Supplementary Figure 59. <sup>13</sup>C NMR of PF-07247685

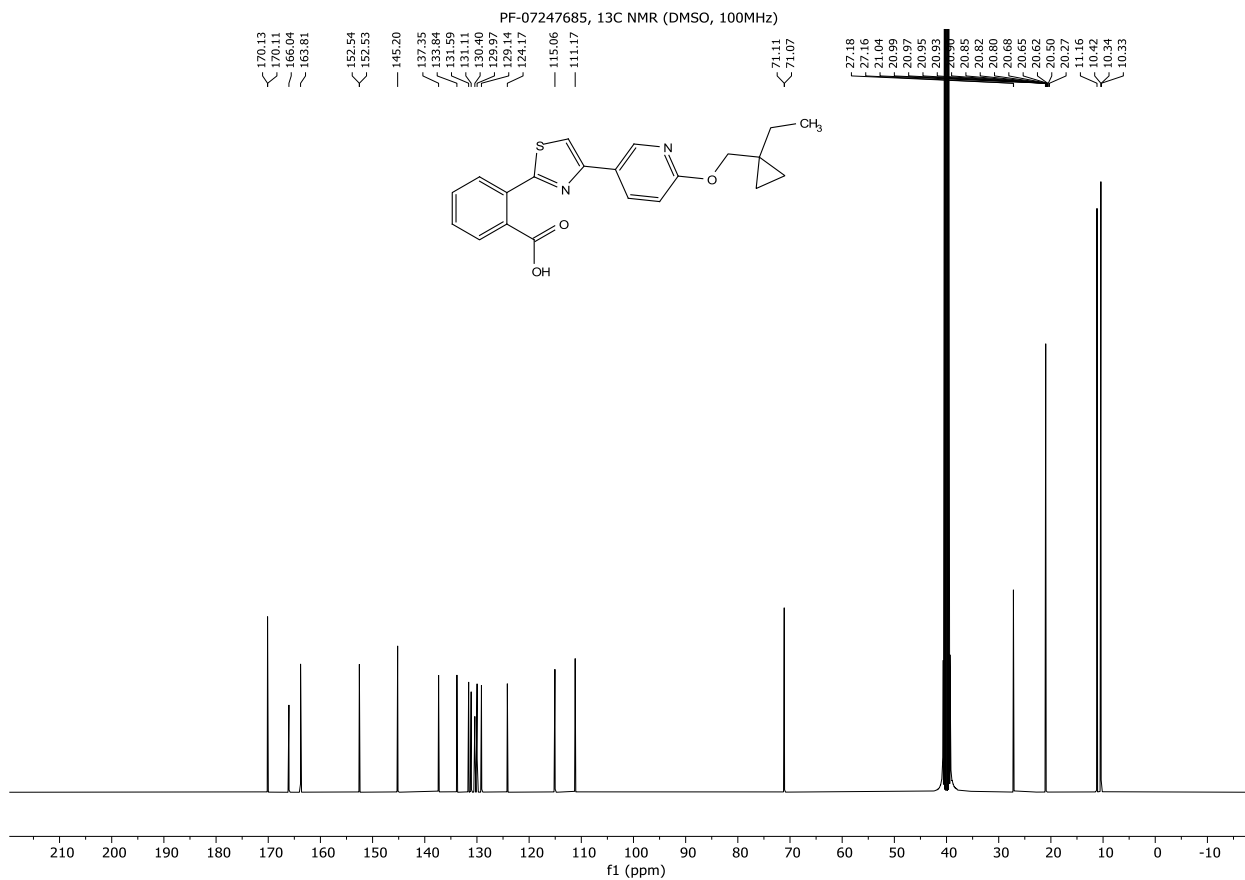

# Supplementary Figure 60. HRMS of PF-07247685

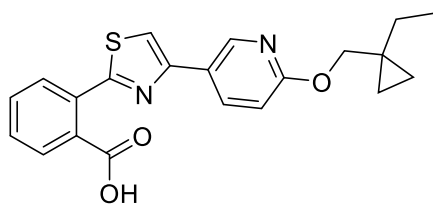

**PF-07247685**

| Open Access HRMS Sample Report |                                                                 |                    |                            |
|--------------------------------|-----------------------------------------------------------------|--------------------|----------------------------|
| Sample ID                      | 00712228-0051-001                                               | HPLC               | Agilent 1200               |
| Molecular Formula              | C <sub>21</sub> H <sub>20</sub> N <sub>2</sub> O <sub>3</sub> S | Mass Spectrometer  | Sciex 5600+ QToF           |
| Submittor                      | Martinez, Luis                                                  | DAD                | 190-400 nm, reported 270nm |
| Run Date                       | 4/27/2023                                                       | MS Scan            | 100-2000 amu               |
| Analyst                        | Quinn, Alandra                                                  | Acquisition Method | HRMS-3min gradient AQ      |
| Analyst's CeN                  | 00714673-0166                                                   | eWB Archive Ref    | 00713459-0294              |

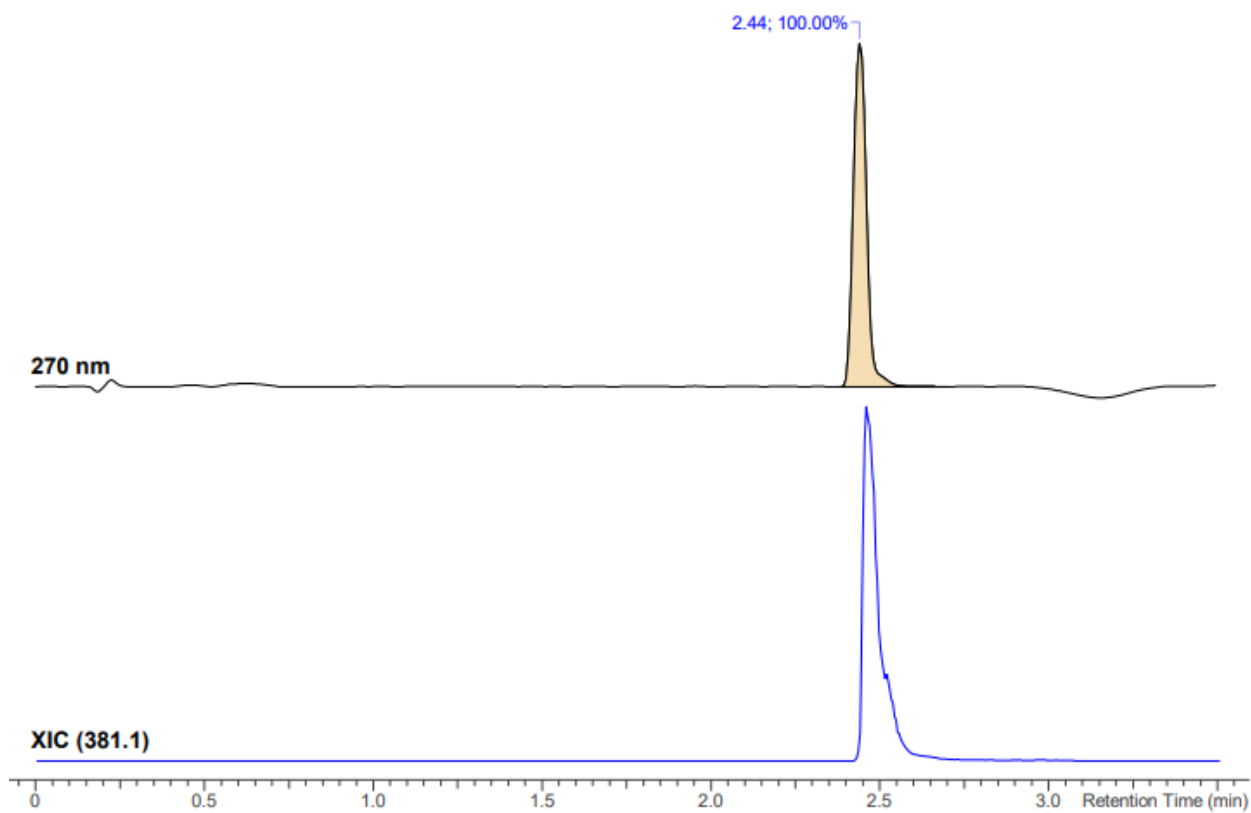

| No. | Peak Name                                                       | tR (min) | Area (%) |
|-----|-----------------------------------------------------------------|----------|----------|
| 1   | C <sub>21</sub> H <sub>20</sub> N <sub>2</sub> O <sub>3</sub> S | 2.44     | 100.00   |

● Spectrum from 00712228-0051-001.wiff (sample 1) - C<sub>21</sub>H<sub>20</sub>N<sub>2</sub>O<sub>3</sub>S, +TOF MS (100 - 2000) from 2.427 to 2.502 min  
 ● Isotopic Distribution for C<sub>21</sub>H<sub>20</sub>N<sub>2</sub>O<sub>3</sub>S H<sup>+</sup>

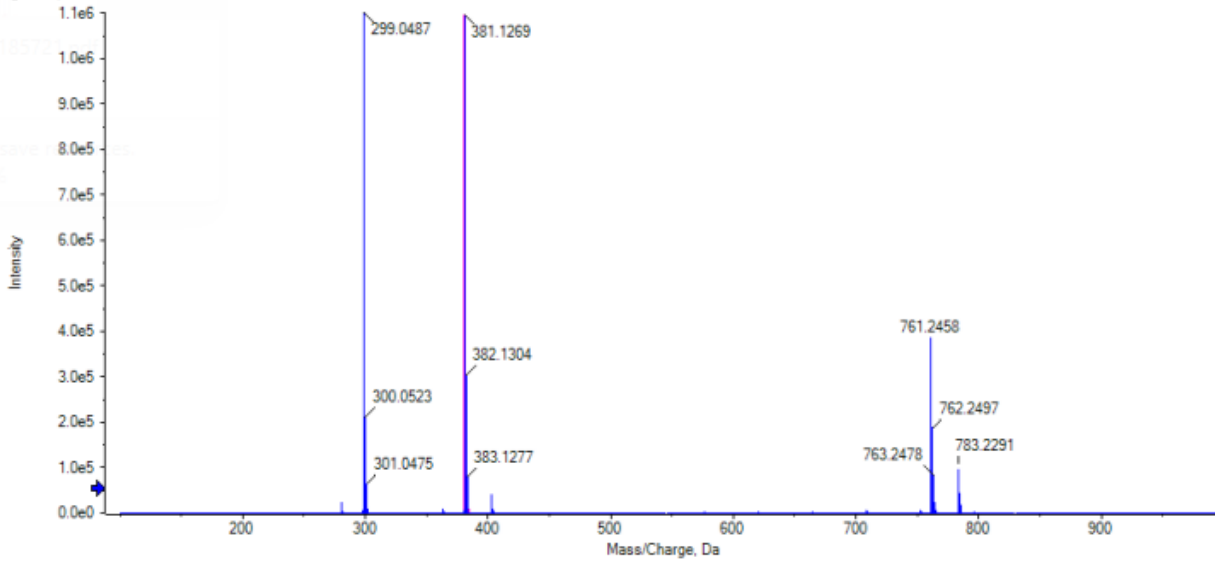

● Spectrum from 00712228-0051-001.wiff (sample 1) - C<sub>21</sub>H<sub>20</sub>N<sub>2</sub>O<sub>3</sub>S, +TOF MS (100 - 2000) from 2.427 to 2.502 min  
 ● Isotopic Distribution for C<sub>21</sub>H<sub>20</sub>N<sub>2</sub>O<sub>3</sub>S H<sup>+</sup>

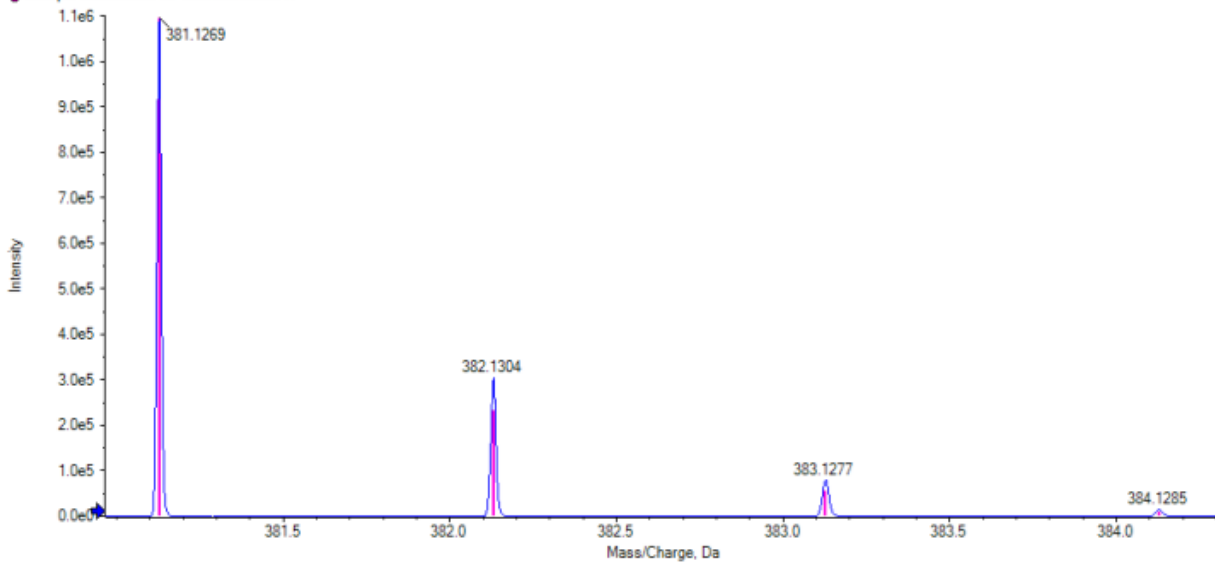

Peak at 2.44 min in UV

| Mass/Charge (Da) | Height  | Relative % Height | Compound                                                        | Peak Type          | Theoretical m/z | Error (ppm) | Theoretical m/z | Theoretical Intensity |
|------------------|---------|-------------------|-----------------------------------------------------------------|--------------------|-----------------|-------------|-----------------|-----------------------|
| 381.1269         | 1097286 | 100.0             | C <sub>21</sub> H <sub>20</sub> N <sub>2</sub> O <sub>3</sub> S | [M+H] <sup>+</sup> | 381.1267        | 0.3         | 381.1267        | 100.0                 |
| 382.1304         | 304353  | 27.7              |                                                                 |                    |                 |             | 382.1298        | 25.2                  |
| 383.1277         | 79446   | 7.2               |                                                                 |                    |                 |             | 383.1271        | 8.1                   |
| 384.1285         | 14392   | 1.3               |                                                                 |                    |                 |             | 384.1282        | 1.5                   |



# Supplementary Figure 61. HPLC of PF-07247685

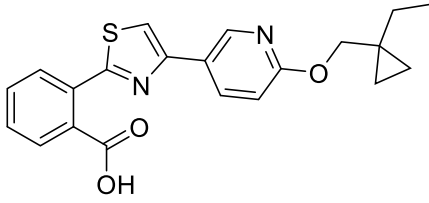

**PF-07247685**

=====  
Acq. Operator : SYSTEM Seq. Line : 2  
Sample Operator : SYSTEM  
Acq. Instrument : HPLC-233GA Location : 7  
Injection Date : 4/27/2023 12:48:32 PM Inj : 1  
Inj Volume : 10.000 µl  
Acq. Method : C:\Users\Public\Documents\ChemStation\1\Data\def\_LC\_2021 2023-04-27 12-29-18\ACID\_GRADIENT.M  
Last changed : 6/9/2021 9:16:24 AM by SYSTEM  
Analysis Method : C:\Users\Public\Documents\ChemStation\1\Data\def\_LC\_2021 2023-04-27 12-29-18\ACID\_GRADIENT.M (Sequence Method)  
Last changed : 4/28/2023 2:01:26 PM by SYSTEM  
(modified after loading)  
Method Info : Column: XBridge C18 5 micron (4.6 mm x 150 mm)  
Flow rate: 1.500 mL/min with solvents containing 0.1% TFA  
0-1.5 min: 5% acetonitrile/water  
1.5-10 min: 5-100% acetonitrile water  
10-11 min: 100% acetonitrile  
11-12.5 min: 100-5% acetonitrile/water

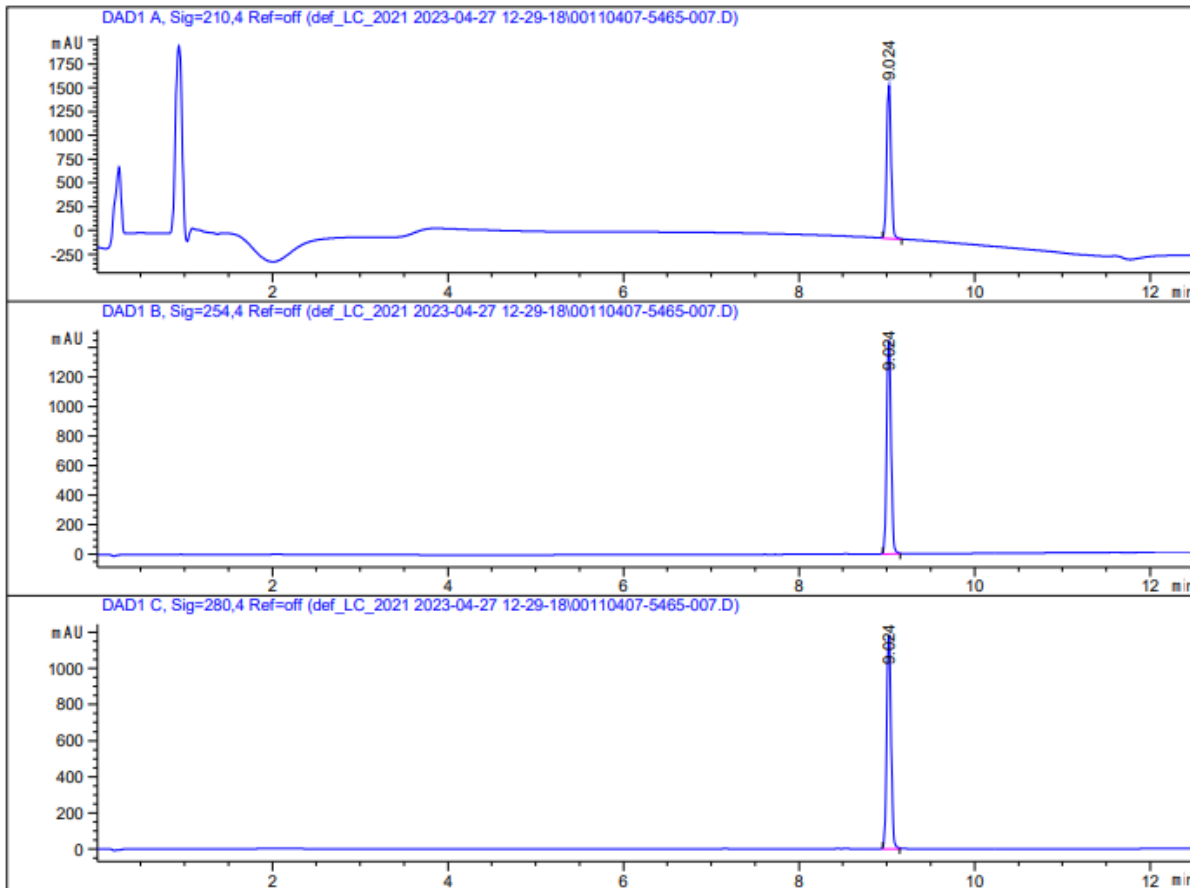

=====  
Area Percent Report  
=====

Sorted By : Signal  
Multiplier : 1.0000  
Dilution : 1.0000  
Do not use Multiplier & Dilution Factor with ISTDs

Signal 1: DAD1 A, Sig=210,4 Ref=off

| Peak # | RetTime [min] | Type | Width [min] | Area [mAU*s] | Height [mAU] | Area %   |
|--------|---------------|------|-------------|--------------|--------------|----------|
| 1      | 9.024         | BB   | 0.0549      | 5616.75732   | 1601.76013   | 100.0000 |

Totals : 5616.75732 1601.76013

Signal 2: DAD1 B, Sig=254,4 Ref=off

| Peak # | RetTime [min] | Type | Width [min] | Area [mAU*s] | Height [mAU] | Area %   |
|--------|---------------|------|-------------|--------------|--------------|----------|
| 1      | 9.024         | BB   | 0.0546      | 5052.00098   | 1450.17712   | 100.0000 |

Totals : 5052.00098 1450.17712

Signal 3: DAD1 C, Sig=280,4 Ref=off

| Peak # | RetTime [min] | Type | Width [min] | Area [mAU*s] | Height [mAU] | Area %   |
|--------|---------------|------|-------------|--------------|--------------|----------|
| 1      | 9.024         | BB   | 0.0546      | 4133.79639   | 1187.12280   | 100.0000 |

Totals : 4133.79639 1187.12280

=====  
\*\*\* End of Report \*\*\*  
=====
